# Supplementary material for: Integrative proteome and metabolome analyses reveal molecular basis of the tail resorption during the metamorphic climax of Nanorana pleskei
Source: Front Cell Dev Biol. 2024 Aug 19;12:1431173. doi: 10.3389/fcell.2024.1431173 (PMC11366584; doi:10.3389/fcell.2024.1431173)
Supplement: Supplementary file 3 [file Table3.XLSX]

## Sheet: MvsR_down_regulated_DEP
Table S3: GO functional enrichment results of down-regulated differentially expressed proteins (DEPs) in M vs R. tip (T), middle (M) and root (R).
ID	Description	GeneRatio	BgRatio	pvalue	p.adjust	qvalue	geneID	Count	Type
GO:0007517	muscle organ development	2/26	16/6817	0.00162442	0.0174486	0.0106335	WG24571/WG16636	2	Biological process
GO:0055114	oxidation-reduction process	2/26	17/6817	0.00183669	0.0174486	0.0106335	WG25161/WG10187	2	Biological process
GO:0006096	glycolytic process	2/26	26/6817	0.00429761	0.0272045	0.0165789	WG05066/WG32495	2	Biological process
GO:0030154	cell differentiation	3/26	97/6817	0.00572727	0.0272045	0.0165789	WG24571/WG16636/WG08071	3	Biological process

## Sheet: MvsR_up_regulated_DEP
Table S3: GO functional enrichment results of up-regulated differentially expressed proteins (DEPs) in M vs R. tip (T), middle (M) and root (R).
ID	Description	GeneRatio	BgRatio	pvalue	p.adjust	qvalue	geneID	Count	Type
GO:0006412	translation	12/173	106/6817	1.34827e-05	0.00151006	0.00134827	WG18920/WG31851/WG04353/WG07114/WG30622/WG15739/WG19677/WG26886/WG02521/WG30786/WG13123/WG02638	12	Biological process
GO:0034314	Arp2/3 complex-mediated actin nucleation	4/173	10/6817	7.46645e-05	0.00327191	0.00292135	WG28884/WG02193/WG17501/WG27569	4	Biological process
GO:0030036	actin cytoskeleton organization	6/173	30/6817	8.76404e-05	0.00327191	0.00292135	WG14848/WG32059/WG29726/WG09846/WG24522/WG30790	6	Biological process
GO:0001731	formation of translation preinitiation complex	4/173	13/6817	0.000239454	0.0067047	0.00598634	WG15340/WG02325/WG03184/WG31506	4	Biological process
GO:0045454	cell redox homeostasis	6/173	44/6817	0.000776395	0.0173913	0.0155279	WG07763/WG08151/WG14250/WG10945/WG05449/WG12100	6	Biological process
GO:0005882	intermediate filament	11/185	32/8537	3.19293e-11	2.58627e-09	1.7141e-09	WG14112/WG25408/WG17318/WG17430/WG26515/WG17441/WG17384/WG19041/WG17350/WG23428/WG03820	11	Cellular component
GO:0005840	ribosome	10/185	81/8537	8.86767e-06	0.000359141	0.000238027	WG18920/WG31851/WG04353/WG07114/WG30622/WG32434/WG15739/WG26886/WG02521/WG13123	10	Cellular component
GO:0005938	cell cortex	5/185	16/8537	1.62892e-05	0.000439808	0.00029149	WG14848/WG26185/WG19765/WG20659/WG11479	5	Cellular component
GO:0030529	ribonucleoprotein complex	7/185	44/8537	3.8964e-05	0.000789022	0.000522938	WG26706/WG19765/WG12282/WG28873/WG27610/WG16271/WG00621	7	Cellular component
GO:0005623	cell	8/185	69/8537	0.000112962	0.00182998	0.00121286	WG07763/WG08151/WG14250/WG10945/WG05449/WG10083/WG22160/WG12100	8	Cellular component
GO:0070062	extracellular vesicular exosome	13/185	186/8537	0.000192948	0.0026048	0.00172638	WG14848/WG09846/WG22220/WG09231/WG09263/WG15739/WG10284/WG14148/WG11731/WG06126/WG30353/WG15483/WG24943	13	Cellular component
GO:0031012	extracellular matrix	6/185	43/8537	0.000298826	0.0032076	0.00212589	WG09846/WG25848/WG15739/WG20068/WG08297/WG00051	6	Cellular component
GO:0022627	cytosolic small ribosomal subunit	4/185	16/8537	0.0003168	0.0032076	0.00212589	WG04353/WG15739/WG19677/WG31506	4	Cellular component
GO:0005635	nuclear envelope	4/185	20/8537	0.000788015	0.00709214	0.00470044	WG03114/WG26045/WG11127/WG06126	4	Cellular component
GO:0030496	midbody	4/185	24/8537	0.00161517	0.0130829	0.00867092	WG26185/WG03114/WG20659/WG11620	4	Cellular component
GO:0005925	focal adhesion	5/185	42/8537	0.00200989	0.0148001	0.00980903	WG14848/WG22465/WG09846/WG09263/WG15739	5	Cellular component
GO:0019013	viral nucleocapsid	3/185	13/8537	0.00243969	0.0164679	0.0109144	WG12282/WG27610/WG16271	3	Cellular component
GO:0005852	eukaryotic translation initiation factor 3 complex	3/185	15/8537	0.00375946	0.0234243	0.0155249	WG15340/WG02325/WG23258	3	Cellular component
GO:0003723	RNA binding	34/235	373/8848	2.02623e-10	1.94518e-08	1.68497e-08	WG14848/WG05443/WG11732/WG31851/WG09846/WG26706/WG27273/WG16268/WG18270/WG19765/WG16254/WG20056/WG26515/WG18057/WG15340/WG20701/WG09263/WG15739/WG28873/WG23844/WG06393/WG22872/WG32055/WG02613/WG11731/WG07064/WG06332/WG31506/WG27610/WG28372/WG16271/WG13447/WG24943/WG02638	34	Molecular function
GO:0005198	structural molecule activity	14/235	96/8848	2.04176e-07	9.80043e-06	8.48941e-06	WG03277/WG24567/WG26499/WG14112/WG25408/WG17318/WG17430/WG17441/WG17336/WG17384/WG19041/WG17350/WG23428/WG03820	14	Molecular function
GO:0003779	actin binding	13/235	90/8848	6.29543e-07	2.01454e-05	1.74505e-05	WG14482/WG09846/WG24522/WG02193/WG27733/WG17501/WG15859/WG17375/WG24918/WG27569/WG28582/WG14763/WG16676	13	Molecular function
GO:0003735	structural constituent of ribosome	14/235	108/8848	8.98325e-07	2.15598e-05	1.86757e-05	WG18920/WG31851/WG20851/WG04353/WG07114/WG30622/WG09263/WG15739/WG19677/WG26886/WG02521/WG30786/WG13123/WG02638	14	Molecular function
GO:0051015	actin filament binding	9/235	54/8848	1.05853e-05	0.000203238	0.000176051	WG11617/WG29726/WG14482/WG22098/WG01498/WG25624/WG24918/WG30353/WG11479	9	Molecular function
GO:0045296	cadherin binding	5/235	23/8848	0.000288067	0.00460907	0.0039925	WG14848/WG09846/WG17336/WG06126/WG15483	5	Molecular function
GO:0004298	threonine-type endopeptidase activity	4/235	23/8848	0.00288591	0.0363447	0.0314828	WG15596/WG26526/WG10241/WG08983	4	Molecular function
GO:0009055	electron carrier activity	4/235	24/8848	0.00339188	0.0363447	0.0314828	WG07763/WG10945/WG05449/WG01082	4	Molecular function
GO:0015035	protein disulfide oxidoreductase activity	3/235	12/8848	0.00340732	0.0363447	0.0314828	WG10945/WG05449/WG12100	3	Molecular function
GO:0003743	translation initiation factor activity	5/235	42/8848	0.00483424	0.0464087	0.0402005	WG15340/WG02325/WG30221/WG03184/WG23258	5	Molecular function

## Sheet: TvsM_down_regulated_DEP
Table S3: GO functional enrichment results of down-regulated differentially expressed proteins (DEPs) in T vs M. tip (T), middle (M) and root (R).
ID	Description	GeneRatio	BgRatio	pvalue	p.adjust	qvalue	geneID	Count	Type
GO:0006096	glycolytic process	5/21	26/6817	1.04859e-08	2.20205e-07	1.43492e-07	WG11462/WG19363/WG32495/WG00612/WG06935	5	Biological process
GO:0006094	gluconeogenesis	2/21	11/6817	0.000488901	0.00513346	0.00334511	WG32495/WG06935	2	Biological process
GO:0007517	muscle organ development	2/21	16/6817	0.00105683	0.00739782	0.00482063	WG18045/WG16636	2	Biological process
GO:0010628	positive regulation of gene expression	2/21	25/6817	0.00259831	0.0136411	0.00888894	WG29729/WG27181	2	Biological process
GO:0005975	carbohydrate metabolic process	3/21	114/6817	0.00486364	0.0204273	0.013311	WG24156/WG32188/WG17585	3	Biological process
GO:0044297	cell body	2/20	10/8537	0.000232033	0.00380473	0.00210788	WG29729/WG27181	2	Cellular component
GO:0030027	lamellipodium	2/20	13/8537	0.000400498	0.00380473	0.00210788	WG29729/WG27181	2	Cellular component
GO:0016459	myosin complex	2/20	27/8537	0.00176714	0.0111919	0.0062005	WG01334/WG20351	2	Cellular component
GO:0005829	cytosol	4/20	300/8537	0.00463726	0.022027	0.0122033	WG29729/WG19363/WG32495/WG03042	4	Cellular component
GO:0051015	actin filament binding	4/32	54/8848	3.92578e-05	0.000863672	0.00061986	WG22902/WG03042/WG01334/WG20351	4	Molecular function
GO:0005509	calcium ion binding	6/32	355/8848	0.00149453	0.0164399	0.0117989	WG13107/WG25503/WG26110/WG07826/WG20070/WG05113	6	Molecular function
GO:0051287	NAD binding	2/32	26/8848	0.00390136	0.02861	0.0205335	WG19363/WG17585	2	Molecular function
GO:0003774	motor activity	2/32	32/8848	0.00587419	0.032308	0.0231876	WG01334/WG20351	2	Molecular function

## Sheet: TvsM_up_regulated_DEP
Table S3: GO functional enrichment results of up-regulated differentially expressed proteins (DEPs) in T vs M. tip (T), middle (M) and root (R).
ID	Description	GeneRatio	BgRatio	pvalue	p.adjust	qvalue	geneID	Count	Type
GO:0034314	Arp2/3 complex-mediated actin nucleation	5/195	10/6817	4.08121e-06	0.000501989	0.000455377	WG27569/WG31687/WG02193/WG31689/WG13755	5	Biological process
GO:0001731	formation of translation preinitiation complex	4/195	13/6817	0.000379013	0.0175134	0.0158872	WG13694/WG03184/WG11989/WG02325	4	Biological process
GO:0016192	vesicle-mediated transport	9/195	80/6817	0.000427156	0.0175134	0.0158872	WG24567/WG14148/WG26499/WG20629/WG04242/WG10705/WG32152/WG06294/WG04960	9	Biological process
GO:0006886	intracellular protein transport	11/195	129/6817	0.00110685	0.0283671	0.0257331	WG24567/WG26499/WG08958/WG20629/WG04242/WG10705/WG29628/WG13809/WG32152/WG06294/WG06433	11	Biological process
GO:0006413	translational initiation	4/195	17/6817	0.00115313	0.0283671	0.0257331	WG13694/WG11989/WG15245/WG02325	4	Biological process
GO:0008152	metabolic process	10/195	118/6817	0.0019403	0.0397761	0.0360827	WG22877/WG10516/WG23434/WG14201/WG22220/WG12615/WG01812/WG28719/WG01783/WG32265	10	Biological process
GO:0005882	intermediate filament	6/197	32/8537	7.68513e-05	0.00630181	0.00542004	WG14112/WG19041/WG17318/WG17350/WG17430/WG17441	6	Cellular component
GO:0005852	eukaryotic translation initiation factor 3 complex	4/197	15/8537	0.000307498	0.00752836	0.00647497	WG13694/WG11989/WG15245/WG02325	4	Cellular component
GO:0070062	extracellular vesicular exosome	13/197	186/8537	0.000357345	0.00752836	0.00647497	WG14148/WG30569/WG00533/WG10465/WG03595/WG27404/WG09846/WG09739/WG22220/WG10284/WG22355/WG31689/WG15483	13	Cellular component
GO:0005925	focal adhesion	6/197	42/8537	0.000367237	0.00752836	0.00647497	WG10465/WG03595/WG09846/WG09739/WG02241/WG09776	6	Cellular component
GO:0008305	integrin complex	4/197	17/8537	0.000517074	0.00756715	0.00650833	WG15696/WG15537/WG02241/WG27637	4	Cellular component
GO:0005829	cytosol	17/197	300/8537	0.000553694	0.00756715	0.00650833	WG14148/WG30569/WG10237/WG03114/WG08958/WG10465/WG08741/WG28337/WG28224/WG13809/WG10681/WG09846/WG10284/WG06433/WG29061/WG09508/WG18436	17	Cellular component
GO:0015629	actin cytoskeleton	4/197	18/8537	0.000652888	0.00764811	0.00657797	WG10237/WG27772/WG02485/WG09776	4	Cellular component
GO:0016282	eukaryotic 43S preinitiation complex	3/197	10/8537	0.00128845	0.0132066	0.0113587	WG13694/WG11989/WG02325	3	Cellular component
GO:0033290	eukaryotic 48S preinitiation complex	3/197	11/8537	0.00174164	0.0158682	0.0136479	WG13694/WG11989/WG02325	3	Cellular component
GO:0005739	mitochondrion	12/197	206/8537	0.00287733	0.0220503	0.0189649	WG24567/WG14148/WG10465/WG28224/WG23633/WG09739/WG03656/WG10284/WG06838/WG28719/WG29316/WG32265	12	Cellular component
GO:0005743	mitochondrial inner membrane	7/197	83/8537	0.00295796	0.0220503	0.0189649	WG19392/WG25736/WG06838/WG14993/WG03437/WG01217/WG02975	7	Cellular component
GO:0045296	cadherin binding	8/251	23/8848	1.27244e-07	1.34878e-05	1.15189e-05	WG30569/WG10237/WG13809/WG09846/WG09739/WG06433/WG17336/WG15483	8	Molecular function
GO:0005198	structural molecule activity	14/251	96/8848	4.57405e-07	2.42425e-05	2.07036e-05	WG24567/WG26499/WG10237/WG08460/WG20629/WG14112/WG10705/WG19041/WG03280/WG17318/WG17336/WG17350/WG17430/WG17441	14	Molecular function
GO:0003779	actin binding	12/251	90/8848	8.02343e-06	0.000283494	0.00024211	WG14482/WG27772/WG27569/WG17375/WG22652/WG09846/WG20978/WG27733/WG02193/WG05537/WG13755/WG02485	12	Molecular function
GO:0051015	actin filament binding	9/251	54/8848	1.79558e-05	0.000475828	0.000406368	WG10237/WG26455/WG14482/WG27772/WG30512/WG15452/WG21590/WG25624/WG18363	9	Molecular function
GO:0003723	RNA binding	25/251	373/8848	5.42105e-05	0.00114926	0.000981495	WG00187/WG31851/WG08200/WG04744/WG10465/WG20864/WG05443/WG03595/WG27562/WG13672/WG09846/WG28372/WG17515/WG09739/WG06393/WG03109/WG29766/WG09603/WG32196/WG32417/WG16617/WG29741/WG29171/WG07070/WG18436	25	Molecular function
GO:0003743	translation initiation factor activity	6/251	42/8848	0.00109265	0.0193035	0.0164856	WG13694/WG23498/WG03184/WG11989/WG15245/WG02325	6	Molecular function
GO:0050660	flavin adenine dinucleotide binding	6/251	48/8848	0.00221847	0.0335939	0.02869	WG01082/WG07763/WG25550/WG16775/WG11727/WG02905	6	Molecular function
GO:0004364	glutathione transferase activity	3/251	11/8848	0.00314357	0.0416523	0.0355719	WG10284/WG01812/WG01783	3	Molecular function

## Sheet: TvsR_down_regulated_DEP
Table S3: GO functional enrichment results of down-regulated differentially expressed proteins (DEPs) in T vs R. tip (T), middle (M) and root (R).
ID	Description	GeneRatio	BgRatio	pvalue	p.adjust	qvalue	geneID	Count	Type
GO:0006096	glycolytic process	7/37	26/6817	4.65016e-11	1.25554e-09	8.81083e-10	WG11462/WG32495/WG19363/WG05066/WG06021/WG00612/WG06935	7	Biological process
GO:0007517	muscle organ development	3/37	16/6817	7.85273e-05	0.00106012	0.000743943	WG18045/WG16636/WG24571	3	Biological process
GO:0006094	gluconeogenesis	2/37	11/6817	0.00152882	0.0137594	0.00965569	WG32495/WG06935	2	Biological process
GO:0055114	oxidation-reduction process	2/37	17/6817	0.00370364	0.0249995	0.0175435	WG25161/WG10187	2	Biological process
GO:0006099	tricarboxylic acid cycle	2/37	24/6817	0.00733893	0.0357749	0.0251052	WG16551/WG00438	2	Biological process
GO:0010628	positive regulation of gene expression	2/37	25/6817	0.00794998	0.0357749	0.0251052	WG29729/WG27181	2	Biological process
GO:0044297	cell body	2/35	10/8537	0.000719847	0.0103178	0.00825421	WG29729/WG27181	2	Cellular component
GO:0005829	cytosol	6/35	300/8537	0.00122909	0.0103178	0.00825421	WG29729/WG32495/WG19363/WG03042/WG25161/WG24571	6	Cellular component
GO:0030027	lamellipodium	2/35	13/8537	0.00123813	0.0103178	0.00825421	WG29729/WG27181	2	Cellular component
GO:0016459	myosin complex	2/35	27/8537	0.00537467	0.0335917	0.0268734	WG01334/WG20351	2	Cellular component
GO:0051015	actin filament binding	6/47	54/8848	3.44298e-07	1.34276e-05	1.15974e-05	WG22902/WG19080/WG03042/WG14440/WG01334/WG20351	6	Molecular function
GO:0051287	NAD binding	3/47	26/8848	0.000335261	0.00653759	0.0056465	WG17585/WG19363/WG16551	3	Molecular function
GO:0000287	magnesium ion binding	4/47	87/8848	0.0011269	0.0146497	0.0126529	WG32188/WG16846/WG06021/WG16551	4	Molecular function
GO:0005509	calcium ion binding	7/47	355/8848	0.00248219	0.0242013	0.0209026	WG13107/WG26110/WG25503/WG20070/WG07826/WG05113/WG12138	7	Molecular function

## Sheet: TvsR_up_regulated_DEP
Table S3: GO functional enrichment results of up-regulated differentially expressed proteins (DEPs) in T vs R. tip (T), middle (M) and root (R).
ID	Description	GeneRatio	BgRatio	pvalue	p.adjust	qvalue	geneID	Count	Type
GO:0006412	translation	34/342	106/6817	3.16116e-19	5.08946e-17	4.39234e-17	WG31851/WG18920/WG15739/WG22084/WG07114/WG20864/WG24581/WG22248/WG04687/WG09733/WG26886/WG04353/WG30622/WG00187/WG02812/WG19677/WG16918/WG06315/WG16080/WG13123/WG30786/WG21480/WG09240/WG00766/WG13820/WG02521/WG26652/WG01516/WG29357/WG13560/WG30114/WG00242/WG15593/WG02638	34	Biological process
GO:0045454	cell redox homeostasis	14/342	44/6817	1.43266e-08	1.15329e-06	9.9532e-07	WG07763/WG08151/WG14250/WG05449/WG29129/WG10945/WG24475/WG11634/WG08191/WG09508/WG19057/WG12103/WG23584/WG12100	14	Biological process
GO:0006413	translational initiation	9/342	17/6817	3.08781e-08	1.65712e-06	1.43014e-06	WG15739/WG21502/WG15340/WG02325/WG31941/WG13694/WG23689/WG29357/WG11989	9	Biological process
GO:0002181	cytoplasmic translation	8/342	14/6817	8.52994e-08	3.4333e-06	2.96303e-06	WG31851/WG20851/WG22248/WG09263/WG09392/WG16918/WG21556/WG13820	8	Biological process
GO:0001731	formation of translation preinitiation complex	6/342	13/6817	1.94043e-05	0.00062482	0.000539237	WG15340/WG03184/WG02325/WG13694/WG31506/WG11989	6	Biological process
GO:0034314	Arp2/3 complex-mediated actin nucleation	5/342	10/6817	6.313e-05	0.00169399	0.00146196	WG28884/WG02193/WG17501/WG27569/WG31687	5	Biological process
GO:0008380	RNA splicing	8/342	34/6817	0.000212871	0.00489604	0.00422541	WG26706/WG11178/WG08200/WG11731/WG23435/WG05493/WG18436/WG24943	8	Biological process
GO:0043161	proteasome-mediated ubiquitin-dependent protein catabolic process	7/342	30/6817	0.000562198	0.0113142	0.00976449	WG10241/WG21132/WG09231/WG32674/WG00927/WG29464/WG10096	7	Biological process
GO:0006511	ubiquitin-dependent protein catabolic process	12/342	87/6817	0.00123799	0.0221463	0.0191129	WG15596/WG26526/WG32493/WG02164/WG17317/WG32674/WG13437/WG29464/WG26178/WG24203/WG10055/WG08983	12	Biological process
GO:0006446	regulation of translational initiation	4/342	13/6817	0.00310128	0.0476048	0.0410843	WG15340/WG02325/WG13694/WG11989	4	Biological process
GO:0030036	actin cytoskeleton organization	6/342	30/6817	0.0032525	0.0476048	0.0410843	WG32059/WG14848/WG09846/WG24522/WG29726/WG30790	6	Biological process
GO:0022627	cytosolic small ribosomal subunit	12/364	16/8537	4.71957e-14	4.62518e-12	3.03046e-12	WG15739/WG22084/WG22248/WG04353/WG00187/WG02812/WG19677/WG06315/WG00766/WG13820/WG31506/WG30114	12	Cellular component
GO:0030529	ribonucleoprotein complex	16/364	44/8537	1.20509e-11	3.25457e-10	2.13242e-10	WG26706/WG19765/WG22248/WG28873/WG30569/WG29760/WG01043/WG21756/WG12282/WG13820/WG09200/WG31960/WG12774/WG27610/WG16271/WG00621	16	Cellular component
GO:0005840	ribosome	21/364	81/8537	1.23995e-11	3.25457e-10	2.13242e-10	WG31851/WG18920/WG15739/WG07114/WG20864/WG24581/WG04687/WG26886/WG04353/WG30622/WG32434/WG00187/WG13123/WG23689/WG13820/WG02521/WG26652/WG01516/WG29357/WG13560/WG15593	21	Cellular component
GO:0022625	cytosolic large ribosomal subunit	12/364	22/8537	1.32839e-11	3.25457e-10	2.13242e-10	WG31851/WG20851/WG09263/WG09392/WG16918/WG16080/WG21556/WG21480/WG09240/WG26652/WG29357/WG00242	12	Cellular component
GO:0070062	extracellular vesicular exosome	30/364	186/8537	2.14722e-10	4.20856e-09	2.75749e-09	WG14848/WG09846/WG14148/WG22220/WG15739/WG10284/WG22248/WG30569/WG21132/WG09263/WG09231/WG17317/WG11731/WG06315/WG32674/WG00927/WG10907/WG06126/WG06507/WG29464/WG00766/WG13820/WG26652/WG21286/WG30353/WG26469/WG29357/WG10055/WG15483/WG24943	30	Cellular component
GO:0005882	intermediate filament	12/364	32/8537	3.14736e-09	5.14069e-08	3.36823e-08	WG14112/WG19041/WG25408/WG17318/WG26515/WG17430/WG17384/WG28529/WG17441/WG24751/WG17350/WG26242	12	Cellular component
GO:0005925	focal adhesion	12/364	42/8537	1.04654e-07	1.46516e-06	9.59985e-07	WG14848/WG22465/WG09846/WG15739/WG22248/WG09263/WG16918/WG06315/WG13820/WG29357/WG02241/WG09776	12	Cellular component
GO:0031012	extracellular matrix	12/364	43/8537	1.39657e-07	1.58175e-06	1.03637e-06	WG09846/WG15739/WG22248/WG25848/WG10907/WG13820/WG20068/WG29357/WG08297/WG08289/WG08294/WG00051	12	Cellular component
GO:0005623	cell	15/364	69/8537	1.45262e-07	1.58175e-06	1.03637e-06	WG07763/WG08151/WG14250/WG05449/WG29129/WG10945/WG11634/WG10083/WG27292/WG09508/WG22160/WG19057/WG12103/WG23584/WG12100	15	Cellular component
GO:0015935	small ribosomal subunit	6/364	10/8537	1.04761e-06	1.02666e-05	6.72677e-06	WG22084/WG22248/WG02812/WG19677/WG06315/WG02638	6	Cellular component
GO:0000502	proteasome complex	7/364	16/8537	1.98308e-06	1.76674e-05	1.15759e-05	WG20848/WG21132/WG00927/WG13437/WG29464/WG12532/WG10055	7	Cellular component
GO:0005844	polysome	6/364	11/8537	2.22207e-06	1.81469e-05	1.189e-05	WG22248/WG09733/WG28873/WG03184/WG10907/WG09200	6	Cellular component
GO:0005829	cytosol	31/364	300/8537	3.96471e-06	2.98878e-05	1.95828e-05	WG28337/WG03114/WG05722/WG09846/WG14148/WG15739/WG16301/WG10284/WG22248/WG10681/WG30569/WG11731/WG03128/WG16765/WG00927/WG10907/WG23435/WG13437/WG29464/WG13820/WG08063/WG09508/WG21286/WG26469/WG29357/WG07448/WG10055/WG11479/WG28070/WG18436/WG12004	31	Cellular component
GO:0005852	eukaryotic translation initiation factor 3 complex	6/364	15/8537	2.08053e-05	0.000145637	9.54229e-05	WG15340/WG02325/WG31941/WG13694/WG23258/WG11989	6	Cellular component
GO:0033290	eukaryotic 48S preinitiation complex	5/364	11/8537	5.12113e-05	0.000334581	0.000219221	WG15340/WG02325/WG13694/WG23689/WG11989	5	Cellular component
GO:0016020	membrane	26/364	272/8537	9.20507e-05	0.00056381	0.000369414	WG14848/WG17316/WG11753/WG14148/WG15739/WG21132/WG09263/WG07896/WG16918/WG17317/WG06315/WG11470/WG00927/WG06507/WG13437/WG29464/WG09772/WG04960/WG26652/WG19392/WG26469/WG29357/WG10055/WG18376/WG02180/WG12004	26	Cellular component
GO:0019013	viral nucleocapsid	5/364	13/8537	0.000132891	0.00072352	0.000474057	WG29760/WG21756/WG12282/WG27610/WG16271	5	Cellular component
GO:0071011	precatalytic spliceosome	5/364	13/8537	0.000132891	0.00072352	0.000474057	WG26706/WG11731/WG23435/WG31960/WG18436	5	Cellular component
GO:0005938	cell cortex	5/364	16/8537	0.000405611	0.0020921	0.00137076	WG14848/WG26185/WG19765/WG20659/WG11479	5	Cellular component
GO:0016282	eukaryotic 43S preinitiation complex	4/364	10/8537	0.000556382	0.00272627	0.00178628	WG15340/WG02325/WG13694/WG11989	4	Cellular component
GO:0071013	catalytic step 2 spliceosome	5/364	19/8537	0.000971375	0.00453308	0.00297012	WG11731/WG23435/WG31960/WG18436/WG24943	5	Cellular component
GO:0005635	nuclear envelope	5/364	20/8537	0.00125038	0.00556989	0.00364944	WG03114/WG26045/WG11127/WG06126/WG30992	5	Cellular component
GO:0005681	spliceosomal complex	5/364	25/8537	0.00359567	0.0153207	0.0100382	WG31693/WG26706/WG11731/WG26469/WG18436	5	Cellular component
GO:0008305	integrin complex	4/364	17/8537	0.00497392	0.0203102	0.0133074	WG15696/WG27637/WG15537/WG02241	4	Cellular component
GO:0015629	actin cytoskeleton	4/364	18/8537	0.0061832	0.0242382	0.0158811	WG29726/WG28873/WG27772/WG09776	4	Cellular component
GO:0042470	melanosome	3/364	10/8537	0.00737489	0.0277977	0.0182133	WG24567/WG09109/WG21286	3	Cellular component
GO:0016363	nuclear matrix	3/364	12/8537	0.0126897	0.0460589	0.0301782	WG11178/WG19392/WG27772	3	Cellular component
GO:0003735	structural constituent of ribosome	38/456	108/8848	1.94426e-22	2.20474e-20	1.83416e-20	WG31851/WG20851/WG18920/WG15739/WG22084/WG07114/WG20864/WG24581/WG22248/WG04687/WG26886/WG04353/WG30622/WG00187/WG02812/WG19677/WG09263/WG09392/WG16918/WG06315/WG16080/WG21556/WG13123/WG30786/WG21480/WG09240/WG00766/WG13820/WG02521/WG26652/WG01516/WG29357/WG32296/WG13560/WG30114/WG00242/WG15593/WG02638	38	Molecular function
GO:0003723	RNA binding	70/456	373/8848	3.55603e-22	2.20474e-20	1.83416e-20	WG05443/WG31851/WG14848/WG09846/WG18270/WG26706/WG11732/WG15739/WG18057/WG20056/WG20701/WG27273/WG19765/WG08200/WG20864/WG05556/WG14218/WG16254/WG26515/WG22248/WG06393/WG16268/WG09733/WG15340/WG28873/WG29760/WG22872/WG32055/WG00187/WG02812/WG09263/WG09392/WG16918/WG11731/WG16080/WG10008/WG21556/WG13064/WG10907/WG04744/WG23435/WG09599/WG02613/WG23844/WG00766/WG07064/WG13820/WG06978/WG26652/WG25417…	70	Molecular function
GO:0003743	translation initiation factor activity	14/456	42/8848	1.06952e-08	4.42068e-07	3.67764e-07	WG21502/WG08368/WG15340/WG03184/WG02325/WG27013/WG31941/WG13694/WG23689/WG30221/WG23498/WG23258/WG03106/WG11989	14	Molecular function
GO:0051015	actin filament binding	13/456	54/8848	2.42632e-06	7.52158e-05	6.25734e-05	WG14482/WG11617/WG22098/WG29726/WG01498/WG25624/WG32653/WG24918/WG27067/WG30353/WG11479/WG27772/WG30350	13	Molecular function
GO:0005198	structural molecule activity	17/456	96/8848	6.75965e-06	0.000140584	0.000116954	WG24567/WG26499/WG03277/WG14112/WG19041/WG25408/WG17318/WG17430/WG17336/WG17384/WG28529/WG17441/WG24751/WG17350/WG26242/WG03280/WG10055	17	Molecular function
GO:0003729	mRNA binding	9/456	28/8848	6.80245e-06	0.000140584	0.000116954	WG19765/WG22248/WG28873/WG09240/WG13820/WG23258/WG19419/WG30114/WG24943	9	Molecular function
GO:0045296	cadherin binding	8/456	23/8848	1.15561e-05	0.000204709	0.000170301	WG14848/WG09846/WG17336/WG30569/WG10907/WG06126/WG26652/WG15483	8	Molecular function
GO:0003779	actin binding	15/456	90/8848	4.92236e-05	0.000762966	0.000634726	WG14482/WG09846/WG24522/WG02193/WG27733/WG17501/WG15859/WG24918/WG27569/WG17375/WG27772/WG28582/WG10783/WG14763/WG16676	15	Molecular function
GO:0004298	threonine-type endopeptidase activity	7/456	23/8848	0.000109895	0.00151411	0.00125962	WG15596/WG26526/WG10241/WG02164/WG05451/WG19910/WG08983	7	Molecular function
GO:0015035	protein disulfide oxidoreductase activity	5/456	12/8848	0.00020831	0.00258305	0.00214889	WG05449/WG10945/WG09508/WG12103/WG12100	5	Molecular function
GO:0051287	NAD binding	6/456	26/8848	0.00172687	0.0194665	0.0161946	WG10681/WG25487/WG03128/WG12840/WG01082/WG30674	6	Molecular function
GO:0030674	protein binding, bridging	4/456	12/8848	0.00247457	0.0255705	0.0212726	WG27067/WG29464/WG19734/WG19731	4	Molecular function
GO:0005544	calcium-dependent phospholipid binding	5/456	20/8848	0.00289423	0.0276065	0.0229663	WG30419/WG30893/WG18438/WG06385/WG07747	5	Molecular function
