# Supplementary material for: Integrative proteome and metabolome analyses reveal molecular basis of the tail resorption during the metamorphic climax of Nanorana pleskei
Source: Front Cell Dev Biol. 2024 Aug 19;12:1431173. doi: 10.3389/fcell.2024.1431173 (PMC11366584; doi:10.3389/fcell.2024.1431173)
Supplement: Supplementary file 7 [file Table1.XLSX]

## Sheet: Sheet 1
Table S1: Detail information of differentially expressed protein (DEP) in three groups. tip (T), middle (M) and root (R). T vs M, T vs R and M vs R.
proteinID	comparison	missingness	diff	CI_2.5	CI_97.5	avg_abundance	t_statistic	pval	adj_pval	B	n_obs	gene_type	log10adj_pval
WG15524	TvsR	complete	-6.08891	-6.52822	-5.64959	21.6401	-28.9537	1.58247e-17	9.0913e-15	30.2093	12	down	14.0414
WG24156	TvsR	complete	-4.29637	-4.607	-3.98574	21.1163	-28.8933	1.64698e-17	9.0913e-15	30.1716	12	down	14.0414
WG14164	TvsR	complete	-5.63064	-6.04876	-5.21252	22.531	-28.1317	2.74456e-17	1.01e-14	29.6884	12	down	13.9957
WG20485	TvsR	complete	-5.29577	-5.70689	-4.88466	21.6963	-26.9099	6.4045e-17	1.76764e-14	28.8815	12	down	13.7526
WG02624	TvsR	complete	-4.72629	-5.11761	-4.33496	20.9593	-25.2304	2.18347e-16	4.82111e-14	27.7026	12	down	13.3169
WG07852	TvsR	complete	-6.32501	-6.85398	-5.79605	22.2646	-24.9791	2.64075e-16	4.85897e-14	27.5187	12	down	13.3135
WG26396	TvsR	complete	-5.45998	-5.92272	-4.99723	20.8105	-24.6485	3.40053e-16	5.36313e-14	27.2738	12	down	13.2706
WG13107	TvsR	complete	-2.97057	-3.22914	-2.712	21.2403	-23.9995	5.63944e-16	7.78243e-14	26.7825	12	down	13.1089
WG26110	TvsR	complete	-6.43907	-7.00718	-5.87097	21.688	-23.6775	7.28303e-16	8.93386e-14	26.5334	12	down	13.049
WG22902	TvsR	complete	-5.23018	-5.69604	-4.76433	21.3396	-23.4534	8.71852e-16	9.62524e-14	26.3579	12	down	13.0166
WG04266	TvsR	complete	-4.50893	-4.91493	-4.10293	21.1303	-23.2002	1.07049e-15	1.07438e-13	26.1574	12	down	12.9688
WG29729	TvsR	complete	-2.68671	-2.93346	-2.43996	23.7459	-22.746	1.55518e-15	1.3706e-13	25.7919	12	down	12.8631
WG28337	TvsR	complete	3.87806	3.51669	4.23942	20.462	22.4188	2.04414e-15	1.58903e-13	25.5238	12	up	12.7989
WG31289	TvsR	complete	-4.85787	-5.31185	-4.40389	20.4903	-22.3538	2.15901e-15	1.58903e-13	25.4701	12	down	12.7989
WG20925	TvsR	complete	-4.86333	-5.32281	-4.40385	20.6869	-22.111	2.65248e-15	1.83021e-13	25.2678	12	down	12.7375
WG14164	TvsM	complete	-5.04341	-5.46153	-4.62528	22.531	-25.1977	2.23793e-16	3.51354e-13	27.5851	12	down	12.4543
WG31450	TvsR	complete	2.63512	2.37625	2.89399	21.1756	21.2649	5.52582e-15	3.58853e-13	24.5445	12	up	12.4451
WG32314	TvsR	complete	-4.25799	-4.6793	-3.83668	21.0105	-21.1126	6.324e-15	3.87872e-13	24.4112	12	down	12.4113
WG10137	TvsR	complete	-5.65221	-6.21928	-5.08514	22.1378	-20.8221	8.20132e-15	4.7654e-13	24.1541	12	down	12.3219
WG24567	TvsR	complete	2.82968	2.54354	3.11582	20.0905	20.6584	9.5086e-15	5.1459e-13	24.0077	12	up	12.2885
WG32221	TvsR	MAR	3.31689	2.99971	3.63408	19.7701	21.9229	1.01083e-14	5.1459e-13	23.9686	11	up	12.2885
WG11462	TvsR	complete	-4.93547	-5.43657	-4.43437	20.86	-20.5753	1.02545e-14	5.1459e-13	23.9329	12	down	12.2885
WG25503	TvsR	complete	-4.75793	-5.24521	-4.27066	24.1433	-20.3978	1.20611e-14	5.78932e-13	23.772	12	down	12.2374
WG31015	TvsR	complete	-2.57156	-2.83694	-2.30617	20.1843	-20.2424	1.39165e-14	6.40161e-13	23.63	12	down	12.1937
WG12823	TvsR	complete	-3.92853	-4.3477	-3.50937	21.7332	-19.5789	2.59337e-14	1.14523e-12	23.0111	12	down	11.9411
WG05443	TvsR	complete	3.4223	3.05431	3.79028	20.7265	19.4281	2.99535e-14	1.27187e-12	22.8676	12	up	11.8956
WG15524	TvsM	complete	-4.76631	-5.20562	-4.32699	21.6401	-22.6646	1.6641e-15	1.30632e-12	25.67	12	down	11.884
WG31004	TvsR	MAR	2.92626	2.62646	3.22605	20.8496	20.463	3.45937e-14	1.40193e-12	22.7609	11	up	11.8533
WG31851	TvsR	complete	2.35055	2.09547	2.60563	21.5756	19.2501	3.55563e-14	1.40193e-12	22.6966	12	up	11.8533
WG26499	TvsR	complete	2.51234	2.23551	2.78918	19.2377	18.9585	4.72355e-14	1.79821e-12	22.4132	12	up	11.7452
WG17310	TvsR	complete	2.67599	2.37864	2.97335	20.4995	18.7996	5.52302e-14	2.03247e-12	22.257	12	up	11.692
WG31418	TvsR	complete	2.77046	2.45961	3.08131	20.5096	18.6183	6.61182e-14	2.35466e-12	22.0771	12	up	11.6281
WG12332	TvsR	complete	-3.61823	-4.02605	-3.21041	20.6983	-18.534	7.19244e-14	2.4503e-12	21.9929	12	down	11.6108
WG14482	TvsR	complete	2.63951	2.34144	2.93757	20.2852	18.499	7.44944e-14	2.4503e-12	21.9578	12	up	11.6108
WG07763	TvsR	complete	4.10634	3.64231	4.57037	19.5535	18.4861	7.54622e-14	2.4503e-12	21.9449	12	up	11.6108
WG20070	TvsR	complete	-4.29863	-4.78575	-3.81152	21.983	-18.4349	7.94454e-14	2.50593e-12	21.8934	12	down	11.601
WG17585	TvsR	complete	-2.8945	-3.22412	-2.56489	20.587	-18.3446	8.70147e-14	2.66845e-12	21.8023	12	down	11.5737
WG28475	TvsR	complete	-5.02293	-5.60214	-4.44373	21.5667	-18.1162	1.09737e-13	3.27433e-12	21.5698	12	down	11.4849
WG02624	TvsM	complete	-3.92149	-4.31281	-3.53016	20.9593	-20.9342	7.41588e-15	3.55679e-12	24.2225	12	down	11.4489
WG04266	TvsM	complete	-4.02526	-4.43125	-3.61926	21.1303	-20.7115	9.06188e-15	3.55679e-12	24.0272	12	down	11.4489
WG18472	TvsR	complete	-4.97413	-5.55152	-4.39673	22.1565	-17.9964	1.24065e-13	3.60441e-12	21.4468	12	down	11.4432
WG26396	TvsM	complete	-4.51975	-4.98249	-4.057	20.8105	-20.404	1.19928e-14	3.72648e-12	23.7536	12	down	11.4287
WG24156	TvsM	complete	-3.00629	-3.31692	-2.69565	21.1163	-20.2174	1.42413e-14	3.72648e-12	23.5855	12	down	11.4287
WG22902	TvsM	complete	-4.42709	-4.89294	-3.96123	21.3396	-19.8522	2.00225e-14	3.9411e-12	23.2518	12	down	11.4044
WG31289	TvsM	complete	-4.31353	-4.76751	-3.85955	20.4903	-19.849	2.0082e-14	3.9411e-12	23.2489	12	down	11.4044
WG32188	TvsR	complete	-2.5794	-2.88185	-2.27695	20.3594	-17.8159	1.49484e-13	4.20335e-12	21.2598	12	down	11.3764
WG07826	TvsR	complete	-5.43861	-6.07696	-4.80025	21.7794	-17.7979	1.52295e-13	4.20335e-12	21.2411	12	down	11.3764
WG09656	TvsR	complete	3.44179	3.03079	3.85279	20.5045	17.4939	2.09289e-13	5.63548e-12	20.9219	12	up	11.2491
WG32059	TvsR	MAR	3.84184	3.45065	4.23302	18.7918	20.763	2.75397e-13	7.239e-12	20.7712	10	up	11.1403
WG32495	TvsR	complete	-4.16154	-4.66735	-3.65573	21.4505	-17.1873	2.89835e-13	7.27443e-12	20.5945	12	down	11.1382
WG10024	TvsR	complete	-4.35812	-4.88783	-3.82841	21.007	-17.187	2.89923e-13	7.27443e-12	20.5942	12	down	11.1382
WG11617	TvsR	complete	2.88225	2.53142	3.23309	21.2006	17.1621	2.97768e-13	7.30525e-12	20.5673	12	up	11.1364
WG27181	TvsR	complete	-4.41242	-4.95106	-3.87377	21.4596	-17.1127	3.13991e-13	7.53579e-12	20.5139	12	down	11.1229
WG20485	TvsM	complete	-3.73991	-4.15102	-3.32879	21.6963	-19.0039	4.51777e-14	7.881e-12	22.4519	12	down	11.1034
WG31693	TvsR	complete	2.83165	2.48392	3.17938	20.0283	17.0115	3.5016e-13	8.22504e-12	20.4042	12	up	11.0849
WG30876	TvsR	complete	4.86142	4.26341	5.45942	21.9861	16.9824	3.61352e-13	8.28579e-12	20.3725	12	up	11.0817
WG14848	TvsR	complete	4.12212	3.61401	4.63023	21.0748	16.9475	3.75262e-13	8.28579e-12	20.3345	12	up	11.0817
WG16846	TvsR	complete	-3.32044	-3.73098	-2.9099	21.041	-16.8958	3.96918e-13	8.35643e-12	20.2779	12	down	11.078
WG26185	TvsR	MAR	3.54497	3.15092	3.93902	20.8075	18.9347	3.99321e-13	8.35643e-12	20.375	10	up	11.078
WG05266	TvsR	complete	2.70312	2.36871	3.03753	20.4711	16.886	4.01169e-13	8.35643e-12	20.2672	12	up	11.078
WG03114	TvsR	complete	2.50753	2.19639	2.81866	20.9576	16.8358	4.23687e-13	8.42761e-12	20.2122	12	up	11.0743
WG26019	TvsR	complete	2.28903	2.00471	2.57336	20.5421	16.8182	4.3192e-13	8.42761e-12	20.1928	12	up	11.0743
WG15696	TvsR	MAR	3.61738	3.21286	4.0219	20.5781	18.8214	4.41603e-13	8.42761e-12	20.2757	10	up	11.0743
WG03277	TvsR	complete	3.19854	2.80073	3.59635	22.7969	16.7965	4.42231e-13	8.42761e-12	20.169	12	up	11.0743
WG22465	TvsR	MAR	2.68316	2.36566	3.00065	20.0425	17.717	4.42755e-13	8.42761e-12	20.2288	11	up	11.0743
WG15496	TvsR	complete	2.12588	1.86095	2.39081	21.0918	16.7629	4.58791e-13	8.58484e-12	20.132	12	up	11.0663
WG20925	TvsM	complete	-4.13257	-4.59205	-3.67309	20.6869	-18.7886	5.58351e-14	8.76611e-12	22.243	12	down	11.0572
WG24189	TvsR	complete	2.6838	2.34747	3.02013	21.4804	16.6696	5.08236e-13	9.35154e-12	20.0288	12	up	11.0291
WG26014	TvsR	complete	3.1567	2.76017	3.55323	20.0838	16.6303	5.30699e-13	9.4829e-12	19.9852	12	up	11.0231
WG05280	TvsR	complete	2.40698	2.10457	2.70938	20.3986	16.6271	5.32554e-13	9.4829e-12	19.9817	12	up	11.0231
WG13265	TvsR	complete	2.41808	2.11136	2.72479	20.6147	16.4694	6.34133e-13	1.11124e-11	19.8056	12	up	10.9542
WG30043	TvsR	complete	2.07051	1.80615	2.33486	20.2738	16.3619	7.1478e-13	1.21102e-11	19.6848	12	up	10.9168
WG30419	TvsR	complete	1.72856	1.50758	1.94954	20.3285	16.3411	7.31668e-13	1.21102e-11	19.6612	12	up	10.9168
WG08151	TvsR	complete	2.54901	2.22302	2.87501	21.6021	16.3345	7.37068e-13	1.21102e-11	19.6538	12	up	10.9168
WG17316	TvsR	complete	2.04186	1.77931	2.30441	20.682	16.2462	8.13843e-13	1.29651e-11	19.5537	12	up	10.8872
WG10407	TvsR	complete	2.15828	1.88061	2.43596	20.0073	16.2372	8.22061e-13	1.29651e-11	19.5436	12	up	10.8872
WG05722	TvsR	complete	2.91741	2.54107	3.29375	20.2042	16.1943	8.62816e-13	1.32437e-11	19.4947	12	up	10.878
WG09846	TvsR	complete	3.1791	2.76899	3.58922	20.1703	16.1933	8.63721e-13	1.32437e-11	19.4937	12	up	10.878
WG10137	TvsM	complete	-4.95093	-5.518	-4.38386	22.1378	-18.2386	9.68753e-14	1.38268e-11	21.6985	12	down	10.8593
WG18188	TvsR	complete	3.08753	2.68779	3.48726	21.0242	16.1354	9.22148e-13	1.39459e-11	19.4275	12	up	10.8556
WG18270	TvsR	complete	2.14582	1.86758	2.42406	20.7242	16.1108	9.48147e-13	1.41453e-11	19.3995	12	up	10.8494
WG18173	TvsR	complete	2.40763	2.09484	2.72041	20.3536	16.0799	9.81996e-13	1.4455e-11	19.364	12	up	10.84
WG14112	TvsR	complete	2.71889	2.36527	3.07252	20.884	16.0617	1.00245e-12	1.45619e-11	19.3432	12	up	10.8368
WG14298	TvsR	MAR	3.53822	3.12123	3.95521	21.7291	17.8591	1.06243e-12	1.52328e-11	19.4067	10	up	10.8172
WG07852	TvsM	complete	-4.54749	-5.07645	-4.01852	22.2646	-17.9592	1.28908e-13	1.68655e-11	21.4155	12	down	10.773
WG19363	TvsR	complete	-2.4077	-2.72401	-2.09139	22.0663	-15.9012	1.20384e-12	1.70389e-11	19.1581	12	down	10.7686
WG13107	TvsM	complete	-2.20713	-2.4657	-1.94856	21.2403	-17.8316	1.47061e-13	1.77605e-11	21.2849	12	down	10.7505
WG20851	TvsR	complete	2.66046	2.3084	3.01252	21.364	15.7862	1.37387e-12	1.9127e-11	19.0245	12	up	10.7184
WG11753	TvsR	complete	2.8411	2.46359	3.21861	21.3898	15.7216	1.48035e-12	2.01505e-11	18.949	12	up	10.6957
WG08180	TvsR	MAR	3.41385	3.00316	3.82454	20.297	17.4956	1.49669e-12	2.01505e-11	19.0661	10	up	10.6957
WG24522	TvsR	complete	2.60112	2.2535	2.94874	20.1672	15.6314	1.64356e-12	2.18613e-11	18.8432	12	up	10.6603
WG10800	TvsR	MAR	3.45246	3.01158	3.89334	19.8372	16.4168	1.6799e-12	2.20787e-11	18.8911	11	up	10.656
WG18472	TvsM	complete	-4.81899	-5.39639	-4.2416	22.1565	-17.4352	2.22676e-13	2.49352e-11	20.873	12	down	10.6032
WG29729	TvsM	complete	-2.05041	-2.29716	-1.80366	23.7459	-17.359	2.41376e-13	2.49352e-11	20.7928	12	down	10.6032
WG25503	TvsM	complete	-4.03783	-4.52511	-3.55055	24.1433	-17.3106	2.54116e-13	2.49352e-11	20.7416	12	down	10.6032
WG27761	TvsR	complete	-2.72415	-3.09182	-2.35647	19.756	-15.4778	1.96642e-12	2.55403e-11	18.6616	12	down	10.5928
WG10847	TvsR	complete	-2.62192	-2.97642	-2.26742	21.8907	-15.4505	2.03031e-12	2.60636e-11	18.6292	12	down	10.584
WG10133	TvsR	complete	3.26988	2.82695	3.71281	19.0796	15.4218	2.10006e-12	2.66491e-11	18.595	12	up	10.5743
WG14148	TvsR	MAR	3.0644	2.66516	3.46364	20.5569	16.0913	2.37996e-12	2.98239e-11	18.5403	11	up	10.5254
WG16768	TvsR	complete	3.20155	2.76462	3.63848	21.6588	15.3071	2.40428e-12	2.98239e-11	18.458	12	up	10.5254
WG08338	TvsR	complete	2.83136	2.44354	3.21919	19.4728	15.2512	2.56912e-12	3.15146e-11	18.3908	12	up	10.5015
WG11462	TvsM	complete	-4.06372	-4.56482	-3.56262	20.86	-16.9411	3.77874e-13	3.2959e-11	20.3466	12	down	10.482
WG22098	TvsR	complete	2.72324	2.34905	3.09743	20.5299	15.2033	2.71953e-12	3.2993e-11	18.3331	12	up	10.4816
WG22890	TvsR	complete	2.81109	2.42448	3.1977	19.9932	15.1895	2.76455e-12	3.31746e-11	18.3165	12	up	10.4792
WG27132	TvsR	complete	-3.44435	-3.91845	-2.97026	20.7371	-15.177	2.80632e-12	3.33137e-11	18.3013	12	down	10.4774
WG15008	TvsR	complete	3.0653	2.64253	3.48807	19.5293	15.1465	2.91006e-12	3.39862e-11	18.2645	12	up	10.4687
WG29726	TvsR	complete	2.524	2.1757	2.8723	21.0171	15.1384	2.93848e-12	3.39862e-11	18.2546	12	up	10.4687
WG12693	TvsR	MAR	3.14488	2.75073	3.53902	20.7782	16.7937	2.95532e-12	3.39862e-11	18.388	10	up	10.4687
WG05113	TvsR	complete	-4.50297	-5.12533	-3.88061	22.6166	-15.1146	3.02328e-12	3.43939e-11	18.2258	12	down	10.4635
WG22009	TvsR	complete	2.11299	1.82079	2.40519	19.8677	15.1064	3.05308e-12	3.43939e-11	18.2159	12	up	10.4635
WG32026	TvsM	complete	-3.60765	-4.05636	-3.15894	20.6831	-16.7957	4.42619e-13	3.65743e-11	20.189	12	down	10.4368
WG06009	TvsR	complete	3.12512	2.68852	3.56172	21.5225	14.9529	3.67186e-12	4.09468e-11	18.0287	12	up	10.3878
WG25992	TvsR	complete	2.42463	2.08427	2.76498	20.0268	14.8819	4.00138e-12	4.38061e-11	17.9415	12	up	10.3585
WG26706	TvsR	complete	2.54015	2.18355	2.89675	20.2882	14.8806	4.00763e-12	4.38061e-11	17.9399	12	up	10.3585
WG13082	TvsR	complete	2.37895	2.04476	2.71314	21.0982	14.8709	4.05511e-12	4.38906e-11	17.928	12	up	10.3576
WG18045	TvsR	complete	-3.0649	-3.49786	-2.63194	20.3375	-14.788	4.48486e-12	4.80708e-11	17.8258	12	down	10.3181
WG10084	TvsR	complete	4.52117	3.88105	5.1613	20.3741	14.7546	4.6713e-12	4.95877e-11	17.7844	12	up	10.3046
WG11732	TvsR	complete	2.57187	2.20707	2.93667	20.3647	14.7277	4.82773e-12	5.07601e-11	17.751	12	up	10.2945
WG13993	TvsR	complete	2.5527	2.18962	2.91577	20.2965	14.6874	5.07166e-12	5.26407e-11	17.7009	12	up	10.2787
WG27943	TvsR	complete	2.13723	1.83315	2.44131	19.7476	14.6826	5.10195e-12	5.26407e-11	17.6949	12	up	10.2787
WG27308	TvsR	complete	3.62496	3.10792	4.142	21.599	14.646	5.33602e-12	5.4546e-11	17.6493	12	up	10.2632
WG06279	TvsR	MAR	2.18735	1.88858	2.48611	19.4337	15.3486	5.39543e-12	5.46473e-11	17.7144	11	up	10.2624
WG00788	TvsR	complete	2.35899	2.02183	2.69615	20.2372	14.6162	5.53514e-12	5.55527e-11	17.6121	12	up	10.2553
WG31015	TvsM	complete	-2.07755	-2.34293	-1.81216	20.1843	-16.3537	7.21368e-13	5.5943e-11	19.7014	12	down	10.2523
WG28475	TvsM	complete	-4.52519	-5.10439	-3.94598	21.5667	-16.321	7.48282e-13	5.5943e-11	19.6648	12	down	10.2523
WG31317	TvsR	complete	2.23391	1.91333	2.55449	20.6878	14.5569	5.95515e-12	5.91688e-11	17.5379	12	up	10.2279
WG13791	TvsR	complete	1.94021	1.66166	2.21877	20.6977	14.5505	6.00263e-12	5.91688e-11	17.5298	12	up	10.2279
WG26891	TvsR	complete	2.19648	1.8809	2.51206	20.668	14.54	6.0807e-12	5.94079e-11	17.5167	12	up	10.2262
WG18920	TvsR	complete	2.5901	2.21459	2.96561	22.3304	14.4091	7.15386e-12	6.92794e-11	17.3515	12	up	10.1594
WG28884	TvsR	complete	2.70628	2.31348	3.09908	20.4334	14.3928	7.30069e-12	7.0083e-11	17.3309	12	up	10.1544
WG20848	TvsR	complete	2.28552	1.95364	2.61741	19.3937	14.3859	7.3638e-12	7.0083e-11	17.3222	12	up	10.1544
WG27934	TvsR	complete	-2.43117	-2.78707	-2.07528	20.9847	-14.2703	8.50962e-12	8.01768e-11	17.1752	12	down	10.096
WG01498	TvsR	MAR	2.29783	1.97544	2.62023	20.6754	14.942	8.56962e-12	8.01768e-11	17.2464	11	up	10.096
WG25636	TvsR	complete	2.72498	2.32561	3.12435	20.3485	14.2538	8.68801e-12	8.06014e-11	17.1541	12	up	10.0937
WG12790	TvsR	complete	3.43484	2.93061	3.93906	20.4958	14.2305	8.94601e-12	8.17035e-11	17.1243	12	up	10.0878
WG22157	TvsR	complete	3.13455	2.67438	3.59472	20.7867	14.2297	8.95482e-12	8.17035e-11	17.1233	12	up	10.0878
WG06325	TvsR	complete	2.57012	2.19144	2.9488	20.7494	14.1783	9.55482e-12	8.64633e-11	17.0574	12	up	10.0632
WG22220	TvsR	complete	3.04098	2.5922	3.48977	19.9165	14.1553	9.837e-12	8.82931e-11	17.0278	12	up	10.0541
WG19319	TvsR	complete	2.05287	1.74871	2.35702	20.3054	14.0998	1.05531e-11	9.39569e-11	16.9563	12	up	10.0271
WG19741	TvsR	complete	2.33204	1.9861	2.67799	19.6889	14.0822	1.07916e-11	9.53116e-11	16.9336	12	up	10.0209
WG32394	TvsR	MAR	3.181	2.74846	3.61353	20.598	15.4791	1.13426e-11	9.93824e-11	17.04	10	up	10.0027
WG27086	TvsR	complete	3.83273	3.25861	4.40684	19.7014	13.9461	1.28362e-11	1.11584e-10	16.7571	12	up	9.9524
WG26110	TvsM	complete	-4.26047	-4.82857	-3.69236	21.688	-15.6664	1.57802e-12	1.12613e-10	18.9178	12	down	9.94841
WG31557	TvsR	complete	2.4723	2.10115	2.84346	20.5402	13.9152	1.3354e-11	1.15178e-10	16.7168	12	up	9.93863
WG16613	TvsR	complete	2.09133	1.77661	2.40606	21.5151	13.8813	1.39483e-11	1.19371e-10	16.6725	12	up	9.9231
WG10024	TvsM	complete	-3.94004	-4.46976	-3.41033	21.007	-15.5383	1.83194e-12	1.21669e-10	18.7681	12	down	9.91482
WG07826	TvsM	complete	-4.74417	-5.38252	-4.10581	21.7794	-15.5253	1.85991e-12	1.21669e-10	18.7529	12	down	9.91482
WG12617	TvsR	complete	-3.08752	-3.55304	-2.622	20.0239	-13.8553	1.44226e-11	1.22481e-10	16.6385	12	down	9.91193
WG19041	TvsR	complete	2.50145	2.12195	2.88095	20.6194	13.7697	1.61064e-11	1.35737e-10	16.5261	12	up	9.8673
WG05066	TvsR	complete	-2.06477	-2.37939	-1.75016	20.4304	-13.7098	1.74059e-11	1.45577e-10	16.4471	12	down	9.83691
WG31812	TvsR	complete	2.16429	1.83402	2.49457	21.6667	13.6893	1.78751e-11	1.47593e-10	16.42	12	up	9.83093
WG06187	TvsR	complete	2.54495	2.15654	2.93336	20.128	13.6876	1.79144e-11	1.47593e-10	16.4177	12	up	9.83093
WG15596	TvsR	MAR	2.60178	2.22053	2.98304	20.6477	14.3067	1.805e-11	1.47609e-10	16.4915	11	up	9.83089
WG20645	TvsR	complete	2.9029	2.45884	3.34696	19.6032	13.6562	1.86608e-11	1.4945e-10	16.3762	12	up	9.8255
WG15739	TvsR	complete	2.01919	1.7103	2.32808	21.1462	13.6556	1.86775e-11	1.4945e-10	16.3753	12	up	9.8255
WG05454	TvsR	complete	-2.61998	-3.02104	-2.21891	21.702	-13.6465	1.89e-11	1.4945e-10	16.3632	12	down	9.8255
WG12769	TvsR	complete	1.91492	1.62175	2.2081	20.44	13.6448	1.89415e-11	1.4945e-10	16.361	12	up	9.8255
WG22084	TvsR	complete	2.10074	1.7791	2.42237	21.0349	13.6444	1.8952e-11	1.4945e-10	16.3604	12	up	9.8255
WG14250	TvsR	complete	1.78656	1.51262	2.0605	20.6344	13.6239	1.94634e-11	1.50427e-10	16.3333	12	up	9.82267
WG25408	TvsR	MAR	2.28451	1.96335	2.60566	22.3066	14.9721	1.9572e-11	1.50427e-10	16.4907	10	up	9.82267
WG16301	TvsR	complete	1.69855	1.43801	1.95908	20.6434	13.6191	1.9587e-11	1.50427e-10	16.3268	12	up	9.82267
WG11677	TvsR	complete	2.71715	2.30033	3.13397	21.9971	13.6178	1.9621e-11	1.50427e-10	16.3251	12	up	9.82267
WG07114	TvsR	complete	2.5908	2.19292	2.98868	20.8622	13.6026	2.00121e-11	1.52368e-10	16.305	12	up	9.81711
WG18057	TvsR	complete	2.09724	1.77404	2.42045	20.8822	13.5553	2.12906e-11	1.60992e-10	16.2419	12	up	9.7932
WG20056	TvsR	complete	1.93958	1.64042	2.23874	20.2542	13.5439	2.16124e-11	1.6122e-10	16.2266	12	up	9.79258
WG21882	TvsR	MAR	2.56702	2.18687	2.94717	20.6457	14.1565	2.16129e-11	1.6122e-10	16.3086	11	up	9.79258
WG21265	TvsR	complete	1.68789	1.42705	1.94873	20.6366	13.5178	2.23635e-11	1.657e-10	16.1918	12	up	9.78068
WG20701	TvsR	complete	1.814	1.53298	2.09502	20.0587	13.4846	2.33613e-11	1.71939e-10	16.1473	12	up	9.76463
WG17318	TvsR	MAR	3.58839	3.0779	4.09889	22.248	14.7948	2.37743e-11	1.7382e-10	16.2946	10	up	9.7599
WG19046	TvsR	MAR	3.76547	3.20404	4.3269	20.4544	14.0606	2.42678e-11	1.76261e-10	16.191	11	up	9.75384
WG12332	TvsM	complete	-2.96074	-3.36856	-2.55293	20.6983	-15.1661	2.8428e-12	1.78528e-10	18.3269	12	down	9.74829
WG30866	TvsR	complete	3.16789	2.67193	3.66384	21.1953	13.3435	2.815e-11	2.00501e-10	15.9573	12	up	9.69788
WG15500	TvsR	complete	1.53596	1.295	1.77693	19.2784	13.3157	2.92092e-11	2.06711e-10	15.9196	12	up	9.68464
WG16914	TvsR	complete	1.94986	1.64367	2.25605	19.9156	13.3032	2.96987e-11	2.08836e-10	15.9027	12	up	9.68019
WG12629	TvsR	complete	2.60566	2.19571	3.0156	19.1288	13.278	3.07134e-11	2.14605e-10	15.8684	12	up	9.66836
WG12664	TvsR	complete	2.04272	1.72099	2.36445	21.2256	13.2636	3.13092e-11	2.17392e-10	15.8489	12	up	9.66276
WG32026	TvsR	complete	-2.83532	-3.28403	-2.38661	20.6831	-13.2001	3.40803e-11	2.33693e-10	15.7624	12	down	9.63135
WG14713	TvsR	MAR	3.85092	3.28994	4.41189	19.3719	14.4486	3.49654e-11	2.38283e-10	15.9051	10	up	9.62291
WG11178	TvsR	complete	2.13333	1.79452	2.47214	20.9252	13.1535	3.62761e-11	2.45699e-10	15.6987	12	up	9.6096
WG27379	TvsR	complete	2.52782	2.12614	2.92949	20.502	13.1466	3.66131e-11	2.46469e-10	15.6893	12	up	9.60824
WG06838	TvsR	complete	3.32915	2.79988	3.85843	21.2046	13.14	3.69436e-11	2.47186e-10	15.6801	12	up	9.60698
WG18692	TvsR	MAR	4.45398	3.77295	5.13502	21.9145	13.7106	3.72546e-11	2.47766e-10	15.7554	11	up	9.60596
WG01248	TvsR	MAR	3.65862	3.0982	4.21904	19.78	13.6862	3.83987e-11	2.53845e-10	15.7247	11	up	9.59543
WG20975	TvsR	complete	3.19715	2.68596	3.70835	20.0551	13.0653	4.08532e-11	2.68464e-10	15.5775	12	up	9.57111
WG16084	TvsR	complete	1.98444	1.66663	2.30226	22.0907	13.044	4.20447e-11	2.74659e-10	15.5482	12	up	9.56121
WG14846	TvsR	MAR	3.32842	2.83591	3.82092	20.6629	14.2242	4.50879e-11	2.92617e-10	15.6481	10	up	9.5337
WG22534	TvsR	complete	1.67451	1.40519	1.94383	22.2714	12.9885	4.53239e-11	2.92617e-10	15.4716	12	up	9.5337
WG27273	TvsR	complete	2.34131	1.96452	2.71809	20.4209	12.9809	4.57914e-11	2.93917e-10	15.4611	12	up	9.53178
WG11047	TvsR	complete	2.23125	1.87069	2.59182	19.9485	12.9274	4.92499e-11	3.14288e-10	15.3868	12	up	9.50267
WG30893	TvsR	complete	2.38848	2.00172	2.77524	20.7378	12.901	5.10532e-11	3.23923e-10	15.3501	12	up	9.48956
WG20070	TvsM	complete	-3.40149	-3.8886	-2.91438	21.983	-14.5875	5.73479e-12	3.46293e-10	17.6209	12	down	9.46056
WG02193	TvsR	MAR	3.54283	3.0106	4.07507	21.1	14.0102	5.76399e-11	3.63626e-10	15.3995	10	up	9.43935
WG21502	TvsR	complete	1.52352	1.27502	1.77202	20.7034	12.8074	5.80218e-11	3.63955e-10	15.2195	12	up	9.43895
WG21683	TvsR	complete	1.77787	1.4876	2.06815	20.5924	12.7948	5.90367e-11	3.66704e-10	15.2018	12	up	9.43568
WG22877	TvsR	complete	1.92581	1.61136	2.24027	19.7852	12.7937	5.91243e-11	3.66704e-10	15.2003	12	up	9.43568
WG12132	TvsR	MNAR	-5.48057	-6.17569	-4.78545	21.209	-16.85	5.96166e-11	3.67691e-10	15.2893	7	down	9.43452
WG28554	TvsR	complete	2.0038	1.67613	2.33147	19.8244	12.7749	6.06759e-11	3.72146e-10	15.1739	12	up	9.42929
WG19765	TvsR	complete	2.13588	1.78595	2.48581	19.6262	12.7508	6.27208e-11	3.82562e-10	15.14	12	up	9.4173
WG20212	TvsR	complete	2.05713	1.71965	2.39461	19.6107	12.7338	6.42036e-11	3.89455e-10	15.1162	12	up	9.40954
WG12823	TvsM	complete	-2.89484	-3.314	-2.47567	21.7332	-14.4272	6.99423e-12	4.06702e-10	17.4208	12	down	9.39072
WG11352	TvsR	MAR	4.08107	3.46039	4.70176	20.3978	13.839	7.03224e-11	4.2424e-10	15.1981	10	up	9.37239
WG15549	TvsR	complete	1.4046	1.17281	1.63639	20.0245	12.659	7.1189e-11	4.27134e-10	15.0107	12	up	9.36944
WG18900	TvsR	MAR	3.59035	3.04356	4.13714	19.6741	13.8202	7.18771e-11	4.27674e-10	15.1759	10	up	9.36889
WG08200	TvsR	complete	2.32715	1.95716	2.69714	22.4434	13.1861	7.20538e-11	4.27674e-10	15.0595	12	up	9.36889
WG29922	TvsR	complete	1.91093	1.59467	2.2272	20.6358	12.6223	7.49099e-11	4.42249e-10	14.9587	12	up	9.35433
WG20864	TvsR	complete	1.93655	1.61572	2.25737	20.6944	12.6097	7.62315e-11	4.47657e-10	14.9409	12	up	9.34905
WG05556	TvsR	complete	1.81122	1.51077	2.11168	19.8013	12.5933	7.79892e-11	4.54111e-10	14.9176	12	up	9.34284
WG10284	TvsR	complete	2.98001	2.48562	3.47441	21.0616	12.5917	7.81532e-11	4.54111e-10	14.9154	12	up	9.34284
WG15323	TvsR	complete	1.61817	1.34926	1.88708	20.7992	12.5705	8.04943e-11	4.65265e-10	14.8853	12	up	9.3323
WG32314	TvsM	complete	-2.8816	-3.30291	-2.46029	21.0105	-14.288	8.32298e-12	4.66681e-10	17.2454	12	down	9.33098
WG14218	TvsR	complete	1.77738	1.48176	2.07299	20.5048	12.5603	8.16548e-11	4.69515e-10	14.8707	12	up	9.32835
WG18438	TvsR	complete	1.97918	1.64965	2.30872	20.3277	12.5467	8.32154e-11	4.76009e-10	14.8513	12	up	9.32238
WG26526	TvsR	complete	2.41962	2.01619	2.82305	20.5157	12.529	8.52876e-11	4.84929e-10	14.8262	12	up	9.31432
WG24992	TvsR	complete	2.17335	1.81089	2.53581	20.2435	12.526	8.56533e-11	4.84929e-10	14.8219	12	up	9.31432
WG06385	TvsR	complete	2.07996	1.73226	2.42766	20.6336	12.4966	8.92388e-11	5.001e-10	14.78	12	up	9.30094
WG27733	TvsR	MAR	2.9548	2.49724	3.41237	20.1012	13.5918	9.40496e-11	5.24398e-10	14.9034	10	up	9.28034
WG12138	TvsR	complete	-1.94026	-2.26639	-1.61413	20.2848	-12.4283	9.82049e-11	5.44815e-10	14.6822	12	down	9.26375
WG16254	TvsR	MAR	2.64496	2.21648	3.07345	19.7243	12.941	9.87996e-11	5.45374e-10	14.7625	11	up	9.26331
WG22260	TvsR	complete	2.15751	1.79283	2.52218	20.0005	12.3591	1.08251e-10	5.92427e-10	14.5827	12	up	9.22737
WG00945	TvsR	complete	1.72757	1.43554	2.01959	20.085	12.3582	1.08397e-10	5.92427e-10	14.5813	12	up	9.22737
WG24581	TvsR	complete	1.73003	1.43734	2.02271	21.1011	12.348	1.09959e-10	5.97346e-10	14.5667	12	up	9.22377
WG26494	TvsR	complete	2.84553	2.36402	3.32703	20.0183	12.3453	1.10379e-10	5.97346e-10	14.5628	12	up	9.22377
WG03546	TvsR	MAR	2.17708	1.82178	2.53238	19.872	12.8458	1.11827e-10	6.02232e-10	14.6362	11	up	9.22024
WG17501	TvsR	complete	2.31437	1.92214	2.70661	20.5261	12.3261	1.13414e-10	6.07811e-10	14.535	12	up	9.21623
WG14371	TvsR	complete	2.19044	1.81902	2.56185	20.8467	12.3201	1.14392e-10	6.09177e-10	14.5263	12	up	9.21526
WG20659	TvsR	complete	2.39838	1.99163	2.80513	19.9939	12.3177	1.14772e-10	6.09177e-10	14.5229	12	up	9.21526
WG26515	TvsR	MAR	2.30243	1.93998	2.66488	20.9393	13.3704	1.22493e-10	6.47046e-10	14.6353	10	up	9.18907
WG22248	TvsR	complete	1.46948	1.21917	1.71979	20.3729	12.2637	1.23897e-10	6.51342e-10	14.4447	12	up	9.18619
WG06393	TvsR	MAR	2.46981	2.06358	2.87605	20.9335	12.7459	1.2746e-10	6.63756e-10	14.5028	11	up	9.17799
WG16268	TvsR	complete	2.69277	2.23135	3.15418	19.3874	12.1912	1.37365e-10	7.11977e-10	14.3392	12	up	9.14753
WG04687	TvsR	complete	1.51642	1.25615	1.77669	20.5696	12.1713	1.41314e-10	7.29024e-10	14.3103	12	up	9.13726
WG18645	TvsR	complete	1.71685	1.42204	2.01166	20.5265	12.1654	1.42518e-10	7.31813e-10	14.3016	12	up	9.1356
WG15334	TvsR	MAR	2.05491	1.72814	2.38168	19.7069	13.2358	1.44079e-10	7.36404e-10	14.4704	10	up	9.13288
WG08368	TvsR	complete	1.56333	1.29404	1.83262	20.1747	12.1274	1.50476e-10	7.65556e-10	14.246	12	up	9.11602
WG17430	TvsR	complete	3.36713	2.78688	3.94738	20.9817	12.1223	1.51581e-10	7.67637e-10	14.2386	12	up	9.11484
WG06786	TvsR	complete	1.68707	1.39624	1.9779	20.714	12.1181	1.52501e-10	7.68772e-10	14.2324	12	up	9.1142
WG27436	TvsR	MAR	2.9699	2.47439	3.46541	20.3417	12.5652	1.61822e-10	8.11984e-10	14.2592	11	up	9.09045
WG23283	TvsR	complete	1.62085	1.34041	1.9013	20.5497	12.0736	1.62544e-10	8.11984e-10	14.1672	12	up	9.09045
WG15712	TvsR	MAR	3.9683	3.33212	4.60447	20.2001	13.1289	1.64078e-10	8.15957e-10	14.3384	10	up	9.08833
WG05818	TvsR	MAR	2.73675	2.2788	3.19471	20.3322	12.5284	1.69955e-10	8.40478e-10	14.2092	11	up	9.07547
WG17336	TvsR	complete	3.28712	2.7167	3.85754	20.4939	12.0382	1.71041e-10	8.40478e-10	14.1151	12	up	9.07547
WG09733	TvsR	complete	1.68344	1.39128	1.97559	20.1434	12.0372	1.71293e-10	8.40478e-10	14.1136	12	up	9.07547
WG10681	TvsR	MAR	2.33939	1.96161	2.71717	19.2307	13.0336	1.84381e-10	9.00693e-10	14.2198	10	up	9.04542
WG15531	TvsR	complete	1.50694	1.24345	1.77044	19.2909	11.9472	1.95072e-10	9.48722e-10	13.9806	12	up	9.02286
WG26886	TvsR	complete	2.22241	1.83105	2.61376	20.3132	11.863	2.2046e-10	1.06749e-09	13.8555	12	up	8.97164
WG04353	TvsR	complete	2.06988	1.70482	2.43494	20.9463	11.8446	2.26447e-10	1.09169e-09	13.8281	12	up	8.9619
WG28203	TvsR	complete	1.38379	1.1396	1.62799	19.6187	11.8379	2.28656e-10	1.09755e-09	13.8182	12	up	8.95958
WG15340	TvsR	MAR	2.95335	2.46859	3.43811	20.3012	12.8231	2.39134e-10	1.14287e-09	13.9554	10	up	8.942
WG00447	TvsR	complete	1.72407	1.41896	2.02918	19.6809	11.8042	2.40194e-10	1.14299e-09	13.7678	12	up	8.94196
WG28873	TvsR	MAR	2.21393	1.8501	2.57776	20.2001	12.8076	2.43775e-10	1.15505e-09	13.9359	10	up	8.9374
WG30569	TvsR	complete	1.44809	1.1915	1.70467	19.8344	11.7897	2.45329e-10	1.15745e-09	13.7462	12	up	8.9365
WG32188	TvsM	complete	-1.95585	-2.2583	-1.6534	20.3594	-13.509	2.26253e-11	1.22489e-09	16.2352	12	down	8.9119
WG20364	TvsR	complete	2.41006	1.98146	2.83865	19.4901	11.7468	2.61281e-10	1.22747e-09	13.6817	12	up	8.91099
WG19083	TvsR	complete	-2.69061	-3.16924	-2.21199	20.9742	-11.7435	2.62527e-10	1.22809e-09	13.6768	12	down	8.91077
WG26909	TvsR	complete	2.29095	1.88002	2.70189	20.692	11.6463	3.02941e-10	1.41117e-09	13.5303	12	up	8.85042
WG30622	TvsR	complete	1.67607	1.37491	1.97724	20.7594	11.6259	3.12215e-10	1.44826e-09	13.4995	12	up	8.83915
WG07298	TvsR	complete	2.75131	2.25681	3.2458	21.021	11.623	3.13531e-10	1.44828e-09	13.4952	12	up	8.83915
WG07622	TvsR	MAR	-2.47922	-2.87536	-2.08309	21.6901	-13.2315	3.16358e-10	1.45408e-09	13.7358	10	down	8.83741
WG22856	TvsR	complete	3.01155	2.46989	3.55321	21.3725	11.6147	3.17422e-10	1.45408e-09	13.4826	12	up	8.83741
WG05449	TvsR	complete	2.17647	1.78466	2.56827	21.7945	11.6043	3.22329e-10	1.47046e-09	13.4669	12	up	8.83255
WG29760	TvsR	complete	1.4841	1.21669	1.75151	19.7925	11.5937	3.27454e-10	1.48769e-09	13.4507	12	up	8.82749
WG13534	TvsR	complete	1.68037	1.3771	1.98365	19.5874	11.5746	3.36847e-10	1.52409e-09	13.4218	12	up	8.81699
WG19080	TvsR	MAR	-2.77351	-3.25756	-2.28947	19.6325	-12.0123	3.41898e-10	1.54063e-09	13.4954	11	down	8.8123
WG15585	TvsR	complete	3.14214	2.57409	3.71019	19.6276	11.5552	3.46694e-10	1.55589e-09	13.3923	12	up	8.80802
WG13679	TvsR	MAR	3.19455	2.65742	3.73167	20.4796	12.5179	3.50831e-10	1.56809e-09	13.5653	10	up	8.80463
WG06672	TvsR	complete	1.86041	1.52286	2.19796	20.4007	11.5136	3.68854e-10	1.642e-09	13.3289	12	up	8.78463
WG19363	TvsM	complete	-2.00235	-2.31866	-1.68604	22.0663	-13.2242	3.2999e-11	1.72695e-09	15.8532	12	down	8.76272
WG22872	TvsR	complete	1.88889	1.54494	2.23283	20.9917	11.4725	3.92203e-10	1.73892e-09	13.266	12	up	8.75972
WG31717	TvsR	complete	1.5846	1.29588	1.87332	21.2235	11.4652	3.9646e-10	1.75077e-09	13.255	12	up	8.75677
WG27181	TvsM	complete	-3.4002	-3.93884	-2.86155	21.4596	-13.187	3.46843e-11	1.75659e-09	15.8028	12	down	8.75533
WG32434	TvsR	complete	2.02631	1.65693	2.39568	21.33	11.4599	3.99637e-10	1.75776e-09	13.2468	12	up	8.75504
WG32055	TvsR	complete	1.88631	1.54111	2.2315	19.9634	11.4153	4.27231e-10	1.87168e-09	13.1785	12	up	8.72777
WG07588	TvsR	complete	1.42756	1.16489	1.69023	19.3992	11.3534	4.68874e-10	2.046e-09	13.0832	12	up	8.6891
WG28337	MvsR	complete	2.68294	2.32158	3.04431	20.462	15.5099	1.89381e-12	2.04721e-09	18.7193	12	up	8.68884
WG03823	TvsR	MAR	2.04242	1.67892	2.40593	20.6462	11.7791	4.72494e-10	2.05367e-09	13.1646	11	up	8.68747
WG25624	TvsR	MAR	2.97252	2.44287	3.50217	19.6518	11.7656	4.81488e-10	2.08301e-09	13.1453	11	up	8.68131
WG03270	TvsR	MAR	4.9042	4.0628	5.7456	21.4588	12.2678	4.83016e-10	2.08301e-09	13.2395	10	up	8.68131
WG17384	TvsR	MAR	2.67348	2.21394	3.13301	21.3908	12.2449	4.97485e-10	2.13706e-09	13.2094	10	up	8.67018
WG32599	TvsR	complete	1.62899	1.32767	1.93032	22.9728	11.2934	5.13348e-10	2.19665e-09	12.9905	12	up	8.65824
WG08150	TvsR	complete	2.03301	1.65449	2.41153	19.7074	11.22	5.73701e-10	2.44543e-09	12.8766	12	up	8.61165
WG26045	TvsR	complete	2.06675	1.6815	2.452	19.9234	11.207	5.85128e-10	2.48396e-09	12.8564	12	up	8.60486
WG11127	TvsR	complete	2.62485	2.13547	3.11423	20.3289	11.2047	5.8724e-10	2.48396e-09	12.8528	12	up	8.60486
WG10691	TvsR	complete	1.88595	1.53375	2.23815	20.4685	11.1862	6.04024e-10	2.54003e-09	12.8239	12	up	8.59516
WG21813	TvsR	complete	-1.61726	-1.89872	-1.3358	19.9677	-12.094	6.05097e-10	2.54003e-09	12.9469	12	down	8.59516
WG11659	TvsR	MAR	3.61527	2.96142	4.26912	19.8761	11.5916	6.15164e-10	2.5725e-09	12.8948	11	up	8.58964
WG03389	TvsR	complete	1.67408	1.36057	1.9876	20.3586	11.1548	6.33568e-10	2.63947e-09	12.775	12	up	8.57848
WG27156	TvsR	MNAR	4.09441	3.47759	4.71124	20.3512	14.1862	6.37051e-10	2.644e-09	13.1108	7	up	8.57774
WG16624	TvsR	complete	1.87509	1.52365	2.22653	19.6204	11.1458	6.42317e-10	2.65587e-09	12.7609	12	up	8.57579
WG29129	TvsR	MAR	1.66293	1.36075	1.96511	20.05	11.537	6.64679e-10	2.73808e-09	12.8155	11	up	8.56255
WG18573	TvsR	MAR	2.34507	1.93343	2.75671	19.6833	11.9905	6.92869e-10	2.8436e-09	12.8716	10	up	8.54613
WG00187	TvsR	complete	1.3659	1.10847	1.62333	20.9697	11.0842	7.05869e-10	2.88622e-09	12.6643	12	up	8.53967
WG09890	TvsR	complete	1.9315	1.56719	2.29582	19.8957	11.0754	7.15457e-10	2.91463e-09	12.6505	12	up	8.53542
WG05540	TvsR	MAR	2.19489	1.80769	2.58208	19.5132	11.9313	7.48973e-10	3.03995e-09	12.7921	10	up	8.51713
WG10241	TvsR	complete	2.38936	1.93611	2.84261	19.5918	11.0124	7.88131e-10	3.18717e-09	12.5514	12	up	8.49659
WG21132	TvsR	complete	1.8111	1.46691	2.1553	19.2629	10.9921	8.13283e-10	3.27688e-09	12.5192	12	up	8.48454
WG18045	TvsM	complete	-2.62805	-3.06101	-2.19509	20.3375	-12.6803	6.91278e-11	3.39158e-09	15.1037	12	down	8.4696
WG28529	TvsR	complete	1.59905	1.29431	1.90378	20.0216	10.9616	8.52418e-10	3.42207e-09	12.4711	12	up	8.46571
WG26835	TvsR	complete	1.72706	1.39716	2.05697	20.8672	10.936	8.86919e-10	3.54768e-09	12.4304	12	up	8.45006
WG21566	TvsR	MAR	1.92978	1.5727	2.28686	21.3644	11.3299	8.93988e-10	3.56304e-09	12.5122	11	up	8.44818
WG26520	TvsR	complete	2.58139	2.08756	3.07521	20.2987	10.9199	9.09226e-10	3.61074e-09	12.405	12	up	8.4424
WG03184	TvsR	complete	2.43371	1.96774	2.89968	19.8373	10.9107	9.22313e-10	3.64958e-09	12.3903	12	up	8.43776
WG20119	TvsR	MAR	1.94643	1.59691	2.29595	20.5764	11.7211	9.89867e-10	3.90291e-09	12.5075	10	up	8.40861
WG17441	TvsR	complete	4.10776	3.31755	4.89796	23.1821	10.8594	9.98787e-10	3.92406e-09	12.3087	12	up	8.40626
WG03042	TvsR	complete	-1.93265	-2.30482	-1.56048	20.5646	-10.8481	1.01654e-09	3.97129e-09	12.2906	12	down	8.40107
WG22793	TvsR	complete	1.46679	1.18431	1.74927	20.3165	10.8472	1.018e-09	3.97129e-09	12.2892	12	up	8.40107
WG02812	TvsR	complete	1.27179	1.02644	1.51713	20.7446	10.8287	1.04783e-09	4.07327e-09	12.2596	12	up	8.39006
WG26056	TvsR	MAR	2.50205	2.03392	2.97018	21.5592	11.2049	1.0711e-09	4.1491e-09	12.3272	11	up	8.38205
WG01926	TvsR	MAR	3.55973	2.91626	4.20321	20.9278	11.6436	1.09829e-09	4.23955e-09	12.4013	10	up	8.37268
WG30972	TvsR	MNAR	-3.37621	-3.90613	-2.84628	19.6968	-13.6159	1.11289e-09	4.28094e-09	12.585	7	down	8.36846
WG05050	TvsR	complete	1.6267	1.31139	1.94201	20.4195	10.7772	1.13549e-09	4.3527e-09	12.1773	12	up	8.36124
WG30683	TvsR	complete	1.41871	1.14307	1.69434	20.8409	10.7523	1.18074e-09	4.50237e-09	12.1372	12	up	8.34656
WG25487	TvsR	complete	1.5131	1.2191	1.8071	20.0092	10.7512	1.18269e-09	4.50237e-09	12.1355	12	up	8.34656
WG13068	TvsR	complete	2.83798	2.28575	3.39021	20.1125	10.7358	1.21176e-09	4.56582e-09	12.1106	12	up	8.34048
WG04088	TvsR	complete	1.79997	1.44903	2.15091	20.8642	10.7144	1.25306e-09	4.70537e-09	12.0763	12	up	8.32741
WG32493	TvsR	complete	1.38773	1.11708	1.65838	20.5823	10.7112	1.25939e-09	4.71311e-09	12.0711	12	up	8.32669
WG02259	TvsR	complete	2.80543	2.25812	3.35275	18.406	10.7079	1.26592e-09	4.72156e-09	12.0658	12	up	8.32591
WG17437	TvsR	MAR	2.38054	1.94452	2.81656	21.4029	11.4912	1.34916e-09	5.01506e-09	12.1912	10	up	8.29972
WG02164	TvsR	MAR	1.77302	1.43638	2.10966	19.4451	11.0415	1.35991e-09	5.03804e-09	12.0827	11	up	8.29774
WG32221	MvsR	MAR	2.17154	1.85435	2.48872	19.7701	14.3527	1.7085e-11	5.15753e-09	16.5881	11	up	8.28756
WG14848	MvsR	complete	3.32	2.81189	3.82811	21.0748	13.6497	1.88211e-11	5.15753e-09	16.4703	12	up	8.28756
WG32059	MvsR	MAR	3.05304	2.6465	3.45957	18.7918	15.8771	1.90843e-11	5.15753e-09	16.4544	9	up	8.28756
WG23517	TvsR	complete	1.53606	1.23456	1.83756	20.0997	10.643	1.40223e-09	5.16019e-09	11.961	12	up	8.28733
WG04228	TvsR	complete	1.22814	0.987016	1.46926	20.1677	10.6403	1.40826e-09	5.16519e-09	11.9566	12	up	8.28691
WG14774	TvsR	MAR	3.20052	2.61159	3.78945	20.7009	11.4381	1.45019e-09	5.30137e-09	12.1174	10	up	8.27561
WG03928	TvsR	MAR	2.24561	1.83076	2.66045	21.0008	11.3932	1.54192e-09	5.61807e-09	12.0547	10	up	8.25041
WG13602	TvsR	MNAR	3.97877	3.33887	4.61866	19.6866	13.2884	1.54723e-09	5.61887e-09	12.2724	7	up	8.25035
WG08952	TvsR	complete	1.64117	1.31671	1.96564	19.3864	10.5663	1.58327e-09	5.73092e-09	11.8365	12	up	8.24178
WG19677	TvsR	complete	1.78362	1.42838	2.13886	20.8624	10.4888	1.79117e-09	6.42628e-09	11.7101	12	up	8.19204
WG08936	TvsR	complete	1.55987	1.24918	1.87056	20.788	10.4882	1.79284e-09	6.42628e-09	11.7091	12	up	8.19204
WG30564	TvsR	complete	1.35958	1.08757	1.63159	20.8654	10.4415	1.93189e-09	6.85792e-09	11.6325	12	up	8.16381
WG08638	TvsR	complete	1.16668	0.932425	1.40093	19.985	10.4042	2.05092e-09	7.2571e-09	11.5712	12	up	8.13924
WG02449	TvsR	complete	1.83815	1.46851	2.20778	20.6068	10.3884	2.10366e-09	7.40177e-09	11.5452	12	up	8.13066
WG26447	TvsR	complete	1.719	1.3732	2.06479	20.6633	10.3847	2.11619e-09	7.41675e-09	11.5391	12	up	8.12979
WG10420	TvsR	complete	1.53263	1.22381	1.84146	20.6983	10.3674	2.17583e-09	7.60165e-09	11.5106	12	up	8.11909
WG00153	TvsR	complete	1.47689	1.17905	1.77473	19.9224	10.3588	2.20613e-09	7.68305e-09	11.4964	12	up	8.11447
WG15859	TvsR	complete	1.72909	1.38032	2.07785	20.516	10.3569	2.21305e-09	7.68305e-09	11.4932	12	up	8.11447
WG06107	TvsR	MAR	2.96346	2.38331	3.5436	19.6001	10.7089	2.22944e-09	7.71568e-09	11.5762	11	up	8.11263
WG05348	TvsR	MNAR	3.45684	2.88268	4.03101	20.5869	12.8671	2.38894e-09	8.24183e-09	11.8582	7	up	8.08398
WG28338	TvsR	complete	2.00275	1.59683	2.40867	18.824	10.3069	2.3987e-09	8.24973e-09	11.4106	12	up	8.08356
WG05443	MvsR	complete	2.27223	1.90425	2.64022	20.7265	12.8993	5.11721e-11	8.9822e-09	15.4817	12	up	8.04662
WG31004	MvsR	MAR	1.90552	1.60573	2.20532	20.8496	13.3251	6.03705e-11	8.9822e-09	15.3531	11	up	8.04662
WG10800	MvsR	complete	2.66846	2.2481	3.08883	19.8372	13.3081	6.16844e-11	8.9822e-09	15.3352	12	up	8.04662
WG17310	MvsR	complete	1.80898	1.51162	2.10634	20.4995	12.7086	6.64733e-11	8.9822e-09	15.2223	12	up	8.04662
WG10945	TvsR	complete	1.65143	1.31469	1.98816	20.6834	10.2449	2.65205e-09	9.09274e-09	11.3077	12	up	8.04131
WG09263	TvsR	complete	1.88798	1.50274	2.27322	21.154	10.2379	2.68245e-09	9.16848e-09	11.296	12	up	8.0377
WG20030	TvsR	complete	1.85927	1.47944	2.23911	19.7796	10.2256	2.73683e-09	9.32551e-09	11.2754	12	up	8.03033
WG04679	TvsR	complete	1.72155	1.36887	2.07424	20.6317	10.197	2.86705e-09	9.70928e-09	11.2277	12	up	8.01281
WG19721	TvsR	MAR	2.82831	2.28236	3.37426	20.166	10.9037	3.0444e-09	1.02784e-08	11.3589	10	up	7.98808
WG03614	TvsR	MNAR	4.57276	3.79887	5.34666	19.7234	12.6279	3.07354e-09	1.03451e-08	11.6168	7	up	7.98527
WG17176	TvsR	complete	1.80523	1.43323	2.17722	20.5427	10.1375	3.15915e-09	1.06009e-08	11.1283	12	up	7.97466
WG11617	MvsR	complete	2.07712	1.72628	2.42795	21.2006	12.368	1.06904e-10	1.07765e-08	14.7504	12	up	7.96752
WG31812	MvsR	complete	1.95254	1.62227	2.28282	21.6667	12.35	1.09659e-10	1.07765e-08	14.7251	12	up	7.96752
WG07763	MvsR	complete	2.72909	2.26506	3.19312	19.5535	12.286	1.20054e-10	1.08149e-08	14.6351	12	up	7.96598
WG28566	TvsR	complete	1.59878	1.26861	1.92895	20.6331	10.1156	3.27435e-09	1.09542e-08	11.0915	12	up	7.96042
WG16794	TvsR	MAR	4.49239	3.61809	5.36669	20.5878	10.8148	3.45333e-09	1.15181e-08	11.2298	10	up	7.93862
WG25550	TvsR	complete	1.73729	1.3766	2.09798	19.2101	10.0619	3.57603e-09	1.18914e-08	11.0011	12	up	7.92477
WG22465	MvsR	MAR	1.91577	1.59828	2.23327	20.0425	12.6499	1.44635e-10	1.2027e-08	14.4926	11	up	7.91984
WG32653	TvsR	complete	1.55188	1.22933	1.87443	20.0358	10.0509	3.6409e-09	1.20364e-08	10.9827	12	up	7.9195
WG16078	TvsR	complete	1.49663	1.18555	1.80772	20.5456	10.0503	3.64446e-09	1.20364e-08	10.9817	12	up	7.9195
WG05043	TvsR	complete	1.70432	1.35002	2.05862	19.9446	10.049	3.65235e-09	1.20364e-08	10.9795	12	up	7.9195
WG02756	TvsR	complete	1.44032	1.14041	1.74024	21.0269	10.0325	3.7533e-09	1.23323e-08	10.9515	12	up	7.90896
WG15696	MvsR	MAR	2.52732	2.1228	2.93184	20.5781	13.1498	1.59961e-10	1.23512e-08	14.4212	10	up	7.90829
WG09392	TvsR	complete	1.40018	1.10841	1.69195	20.4861	10.025	3.79977e-09	1.24479e-08	10.9389	12	up	7.9049
WG10133	MvsR	complete	2.53073	2.0878	2.97367	19.0796	11.9357	1.9834e-10	1.24905e-08	14.1352	12	up	7.90342
WG30876	MvsR	complete	3.4164	2.81839	4.01441	21.9861	11.9345	1.98695e-10	1.24905e-08	14.1334	12	up	7.90342
WG18188	MvsR	complete	2.28335	1.88361	2.68309	21.0242	11.9327	1.99199e-10	1.24905e-08	14.1309	12	up	7.90342
WG03277	MvsR	complete	2.26667	1.86887	2.66448	22.7969	11.903	2.07982e-10	1.24905e-08	14.0879	12	up	7.90342
WG09231	TvsR	MNAR	3.37446	2.79363	3.95528	20.7923	12.4163	3.8541e-09	1.25885e-08	11.3994	7	up	7.90002
WG07896	TvsR	complete	1.60464	1.26955	1.93973	20.7273	10.0037	3.93532e-09	1.28159e-08	10.9029	12	up	7.89225
WG12248	TvsR	complete	-2.33341	-2.82098	-1.84585	23.3497	-9.99777	3.97416e-09	1.29043e-08	10.8929	12	down	7.88926
WG16918	TvsR	complete	1.57237	1.24357	1.90116	20.6917	9.99005	4.02515e-09	1.30316e-08	10.8798	12	up	7.885
WG25848	TvsR	MAR	4.93259	3.92714	5.93804	21.3935	10.2848	4.2569e-09	1.37015e-08	10.9131	11	up	7.86323
WG22133	TvsR	complete	1.70565	1.34709	2.06422	20.3482	9.93726	4.39248e-09	1.40968e-08	10.7902	12	up	7.85088
WG17317	TvsR	MAR	1.53415	1.2205	1.84781	19.6758	10.2542	4.46334e-09	1.42468e-08	10.8645	11	up	7.84628
WG11731	TvsR	complete	1.88782	1.49056	2.28507	20.6945	9.92738	4.46502e-09	1.42468e-08	10.7734	12	up	7.84628
WG23596	TvsR	complete	1.91436	1.51117	2.31755	21.0481	9.91873	4.52959e-09	1.44111e-08	10.7587	12	up	7.8413
WG21813	MvsR	MAR	-1.90237	-2.21704	-1.58769	19.9677	-12.7242	2.7054e-10	1.5368e-08	13.9079	10	down	7.81338
WG29726	MvsR	complete	1.94379	1.59549	2.29208	21.0171	11.6584	2.9756e-10	1.5368e-08	13.7306	12	up	7.81338
WG13265	MvsR	complete	1.71139	1.40468	2.0181	20.6147	11.6562	2.98545e-10	1.5368e-08	13.7273	12	up	7.81338
WG05113	TvsM	complete	-3.44372	-4.06608	-2.82135	22.6166	-11.5591	3.44688e-10	1.63988e-08	13.4708	12	down	7.78519
WG18920	MvsR	complete	2.07968	1.70417	2.45519	22.3304	11.5695	3.39413e-10	1.66775e-08	13.5992	12	up	7.77787
WG24918	TvsR	complete	2.37365	1.86851	2.87878	20.5129	9.81634	5.37173e-09	1.69925e-08	10.5838	12	up	7.76974
WG15051	TvsR	complete	1.79936	1.4159	2.18282	20.439	9.80253	5.49717e-09	1.73397e-08	10.5601	12	up	7.76096
WG21532	TvsR	MAR	3.27018	2.61347	3.92688	18.1341	10.481	5.58228e-09	1.7558e-08	10.738	10	up	7.75553
WG02662	TvsR	complete	1.97499	1.55264	2.39735	21.7107	9.76852	5.81942e-09	1.82518e-08	10.5017	12	up	7.73869
WG06315	TvsR	complete	1.41639	1.11312	1.71966	21.3139	9.75644	5.93861e-09	1.85729e-08	10.4809	12	up	7.73112
WG01983	TvsR	MAR	3.17694	2.53597	3.8179	20.1196	10.4322	5.99421e-09	1.86615e-08	10.665	10	up	7.72905
WG24475	TvsR	complete	1.579	1.24069	1.9173	20.4814	9.75023	6.00075e-09	1.86615e-08	10.4702	12	up	7.72905
WG20011	TvsR	complete	1.42198	1.11637	1.72758	19.2723	9.7202	6.3114e-09	1.95702e-08	10.4184	12	up	7.70841
WG23345	TvsR	complete	1.74049	1.36632	2.11467	20.049	9.71719	6.34348e-09	1.95702e-08	10.4132	12	up	7.70841
WG16074	TvsR	MNAR	2.84324	2.3351	3.35138	20.5991	11.9581	6.3624e-09	1.95702e-08	10.9157	7	up	7.70841
WG10179	TvsR	complete	2.00125	1.57086	2.43163	18.605	9.71369	6.38094e-09	1.95702e-08	10.4072	12	up	7.70841
WG22586	TvsR	MAR	2.01382	1.59271	2.43492	20.1226	10.0256	6.38158e-09	1.95702e-08	10.4978	11	up	7.70841
WG06009	MvsR	complete	2.38325	1.94665	2.81985	21.5225	11.4032	4.35045e-10	1.98371e-08	13.3512	12	up	7.70252
WG31450	MvsR	complete	1.40911	1.15024	1.66798	21.1756	11.3712	4.56467e-10	1.98371e-08	13.3031	12	up	7.70252
WG13082	MvsR	complete	1.81599	1.4818	2.15018	21.0982	11.3518	4.7002e-10	1.98371e-08	13.2739	12	up	7.70252
WG24567	MvsR	complete	1.55334	1.2672	1.83948	20.0905	11.3403	4.78204e-10	1.98371e-08	13.2566	12	up	7.70252
WG05722	MvsR	complete	2.03874	1.6624	2.41508	20.2042	11.3168	4.95468e-10	1.98371e-08	13.2211	12	up	7.70252
WG07747	TvsR	complete	2.59736	2.03803	3.1567	20.711	9.70072	6.5219e-09	1.99451e-08	10.3847	12	up	7.70016
WG07149	TvsR	complete	2.23088	1.74988	2.71188	18.3399	9.68885	6.65372e-09	2.0292e-08	10.3642	12	up	7.69268
WG19407	TvsR	complete	1.28358	1.00675	1.5604	20.4897	9.68629	6.68246e-09	2.03235e-08	10.3598	12	up	7.692
WG16768	MvsR	complete	2.35711	1.92018	2.79403	21.6588	11.2697	5.32054e-10	2.03942e-08	13.1499	12	up	7.69049
WG14482	MvsR	complete	1.60537	1.30731	1.90344	20.2852	11.2513	5.47116e-10	2.03942e-08	13.122	12	up	7.69049
WG06265	TvsR	MAR	2.00611	1.58512	2.4271	19.4106	9.98997	6.75039e-09	2.04737e-08	10.4401	11	up	7.6888
WG10847	TvsM	complete	-1.92887	-2.28337	-1.57437	21.8907	-11.3665	4.59722e-10	2.12284e-08	13.1776	12	down	7.67308
WG24897	TvsR	complete	1.32112	1.03403	1.60821	19.7514	9.61316	7.562e-09	2.28725e-08	10.2329	12	up	7.64069
WG27569	TvsR	MAR	2.59933	2.0662	3.13247	20.1219	10.2618	7.69921e-09	2.31818e-08	10.4085	10	up	7.63485
WG25713	TvsR	complete	1.33024	1.04083	1.61965	20.5154	9.60201	7.70627e-09	2.31818e-08	10.2135	12	up	7.63485
WG24751	TvsR	complete	1.41014	1.10282	1.71745	21.5523	9.58562	7.9237e-09	2.37711e-08	10.185	12	up	7.62395
WG02325	TvsR	MAR	3.16856	2.51693	3.82019	19.4827	10.2344	8.01884e-09	2.39913e-08	10.3668	10	up	7.61995
WG17375	TvsR	MNAR	3.67256	3.0017	4.34342	20.9472	11.6996	8.50213e-09	2.53685e-08	10.6347	7	up	7.59571
WG16080	TvsR	complete	1.38568	1.08226	1.68911	21.0328	9.54013	8.56121e-09	2.54759e-08	10.1056	12	up	7.59387
WG26014	MvsR	complete	2.1032	1.70667	2.49973	20.0838	11.0802	7.10208e-10	2.55912e-08	12.8608	12	up	7.59191
WG21787	TvsR	complete	1.24056	0.967875	1.51324	20.4158	9.50392	9.1068e-09	2.70266e-08	10.0422	12	up	7.56821
WG32495	TvsM	complete	-2.70792	-3.21373	-2.20211	21.4505	-11.1838	6.06177e-10	2.71914e-08	12.8958	12	down	7.56557
WG28083	TvsR	complete	1.49685	1.16655	1.82714	20.1937	9.46711	9.69849e-09	2.87055e-08	9.97764	12	up	7.54204
WG29903	TvsR	complete	2.9594	2.30534	3.61345	20.2184	9.45218	9.94974e-09	2.93703e-08	9.95139	12	up	7.53209
WG14298	MvsR	MAR	2.34121	1.92422	2.7582	21.7291	11.8172	8.70978e-10	2.94227e-08	12.759	10	up	7.53132
WG04875	TvsR	MNAR	3.65695	2.98053	4.33337	20.1149	11.5541	1.00329e-08	2.95368e-08	10.4739	7	up	7.52964
WG17350	TvsR	MAR	4.26287	3.36916	5.15658	21.8075	10.0394	1.07259e-08	3.14932e-08	10.0686	10	up	7.50178
WG10008	TvsR	complete	1.63018	1.26764	1.99271	19.769	9.3935	1.1005e-08	3.22267e-08	9.84797	12	up	7.49178
WG18297	TvsR	complete	1.45841	1.13386	1.78297	20.0215	9.38713	1.11263e-08	3.24959e-08	9.83672	12	up	7.48817
WG21556	TvsR	complete	1.42807	1.1097	1.74643	20.0912	9.37051	1.14495e-08	3.33515e-08	9.80734	12	up	7.47688
WG13064	TvsR	complete	1.76256	1.3691	2.15603	19.6255	9.35795	1.17003e-08	3.39925e-08	9.78511	12	up	7.46862
WG28074	TvsR	complete	1.58393	1.23005	1.9378	20.208	9.35026	1.18565e-08	3.43559e-08	9.7715	12	up	7.464
WG18173	MvsR	complete	1.61554	1.30275	1.92833	20.3536	10.7897	1.11354e-09	3.50309e-08	12.4102	12	up	7.45555
WG11732	MvsR	complete	1.88214	1.51734	2.24694	20.3647	10.778	1.13421e-09	3.50309e-08	12.3918	12	up	7.45555
WG24189	MvsR	complete	1.73103	1.3947	2.06736	21.4804	10.7518	1.18174e-09	3.54849e-08	12.3506	12	up	7.44996
WG03128	TvsR	complete	1.39116	1.07955	1.70278	20.1812	9.32621	1.23596e-08	3.572e-08	9.72885	12	up	7.44709
WG16765	TvsR	MAR	1.28528	1.00489	1.56566	19.0093	9.60994	1.24064e-08	3.57617e-08	9.81551	11	up	7.44658
WG27013	TvsR	complete	1.2636	0.979999	1.54721	21.5961	9.30762	1.27637e-08	3.66957e-08	9.69585	12	up	7.43539
WG05280	MvsR	complete	1.54898	1.24657	1.85139	20.3986	10.7002	1.28143e-09	3.68854e-08	12.2694	12	up	7.43315
WG09656	MvsR	complete	2.1007	1.6897	2.5117	20.5045	10.6774	1.32815e-09	3.68854e-08	12.2334	12	up	7.43315
WG31851	MvsR	complete	1.30363	1.04855	1.55871	21.5756	10.6762	1.33074e-09	3.68854e-08	12.2315	12	up	7.43315
WG31303	TvsR	MAR	1.47715	1.15397	1.80033	19.9794	9.58205	1.29815e-08	3.7225e-08	9.769	11	up	7.42917
WG04013	TvsR	complete	1.52321	1.18075	1.86567	19.8417	9.29157	1.31238e-08	3.75354e-08	9.6673	12	up	7.42556
WG14713	MvsR	MAR	3.04414	2.48317	3.60511	19.3719	11.4216	1.48333e-09	3.92469e-08	12.2331	10	up	7.4062
WG20645	MvsR	complete	2.25398	1.80992	2.69804	19.6032	10.6035	1.49264e-09	3.92469e-08	12.1163	12	up	7.4062
WG25636	MvsR	complete	2.02096	1.62159	2.42033	20.3485	10.5712	1.57107e-09	3.92469e-08	12.0649	12	up	7.4062
WG27436	MvsR	MAR	2.58386	2.08835	3.07937	20.3417	10.9319	1.59846e-09	3.92469e-08	12.1059	11	up	7.4062
WG26185	MvsR	MAR	2.12634	1.73229	2.5204	20.8075	11.3574	1.61932e-09	3.92469e-08	12.1463	10	up	7.4062
WG31693	MvsR	complete	1.75553	1.40781	2.10326	20.0283	10.5466	1.63377e-09	3.92469e-08	12.0256	12	up	7.4062
WG03591	TvsR	complete	1.50818	1.16759	1.84877	20.138	9.25055	1.40925e-08	4.02019e-08	9.59423	12	up	7.39575
WG29133	TvsR	complete	2.09905	1.62491	2.57319	21.1143	9.24821	1.41498e-08	4.02612e-08	9.59007	12	up	7.39511
WG11470	TvsR	MAR	2.26921	1.78367	2.75476	19.7171	9.83666	1.45767e-08	4.13694e-08	9.75393	10	up	7.38332
WG10084	MvsR	complete	3.20871	2.56859	3.84884	20.3741	10.4715	1.84146e-09	4.32742e-08	11.9055	12	up	7.36377
WG32674	TvsR	MAR	1.88682	1.48131	2.29234	18.892	9.7932	1.55768e-08	4.39816e-08	9.68585	10	up	7.35673
WG21882	MvsR	MAR	1.95973	1.57958	2.33988	20.6457	10.8074	1.92339e-09	4.4238e-08	11.921	11	up	7.3542
WG05266	MvsR	complete	1.66678	1.33237	2.00119	20.4711	10.4121	2.02504e-09	4.56057e-08	11.81	12	up	7.34098
WG16846	TvsM	complete	-2.12828	-2.53882	-1.71774	21.041	-10.8296	1.04637e-09	4.56334e-08	12.3394	12	down	7.34072
WG13123	TvsR	complete	2.0123	1.55358	2.47103	20.3871	9.16394	1.63901e-08	4.61598e-08	9.43925	12	up	7.33574
WG02672	TvsR	complete	1.86281	1.43797	2.28764	19.4798	9.15981	1.6509e-08	4.63765e-08	9.43183	12	up	7.3337
WG11620	TvsR	MAR	1.85602	1.44354	2.2685	19.3156	9.43331	1.65557e-08	4.63896e-08	9.51934	11	up	7.33358
WG15008	MvsR	complete	2.10169	1.67892	2.52445	19.5293	10.385	2.11501e-09	4.66598e-08	11.7664	12	up	7.33106
WG04455	TvsR	complete	1.58735	1.22403	1.95067	20.7384	9.12696	1.74868e-08	4.88746e-08	9.37279	12	up	7.31092
WG14870	TvsR	complete	1.37414	1.05877	1.68951	20.0195	9.1024	1.82571e-08	5.08987e-08	9.32856	12	up	7.29329
WG30894	TvsM	complete	2.05401	1.69442	2.4136	20.1499	12.0763	1.25469e-09	5.32394e-08	12.3362	12	up	7.27377
WG31748	TvsR	MNAR	3.34722	2.76401	3.93043	19.2412	12.4439	1.98031e-08	5.50694e-08	9.89265	7	up	7.25909
WG00927	TvsR	complete	1.54152	1.18584	1.8972	19.7797	9.05384	1.98859e-08	5.51608e-08	9.24087	12	up	7.25837
WG10907	TvsR	complete	1.10156	0.846654	1.35647	21.3519	9.02745	2.08336e-08	5.76448e-08	9.1931	12	up	7.23924
WG26499	MvsR	complete	1.35573	1.0789	1.63256	19.2377	10.2305	2.71484e-09	5.86949e-08	11.5155	12	up	7.2314
WG19371	TvsR	complete	2.61252	2.00682	3.21821	20.2286	9.01043	2.14699e-08	5.9257e-08	9.16223	12	up	7.22726
WG31418	MvsR	complete	1.51755	1.2067	1.82841	20.5096	10.1984	2.86028e-09	5.9486e-08	11.463	12	up	7.22559
WG32394	MvsR	MAR	2.24976	1.81723	2.6823	20.598	10.9476	2.86149e-09	5.9486e-08	11.5818	10	up	7.22559
WG19244	TvsR	complete	-1.47747	-1.82032	-1.13462	20.3276	-9.00246	2.17746e-08	5.9948e-08	9.14777	12	down	7.22223
WG06126	TvsR	complete	1.99626	1.53284	2.45967	21.3786	8.99879	2.19162e-08	6.01184e-08	9.14112	12	up	7.22099
WG20851	MvsR	complete	1.71167	1.35961	2.06374	21.364	10.1565	3.06272e-09	6.10445e-08	11.3942	12	up	7.21435
WG08151	MvsR	complete	1.58366	1.25766	1.90965	21.6021	10.1483	3.10375e-09	6.10445e-08	11.3809	12	up	7.21435
WG09846	MvsR	complete	1.99226	1.58214	2.40237	20.1703	10.1479	3.10587e-09	6.10445e-08	11.3802	12	up	7.21435
WG27067	TvsR	complete	1.2317	0.945184	1.51822	19.9339	8.98044	2.26403e-08	6.18685e-08	9.10777	12	up	7.20853
WG11352	MvsR	MAR	3.20382	2.58313	3.8245	20.3978	10.8642	3.21945e-09	6.21468e-08	11.4648	10	up	7.20658
WG25771	TvsR	complete	1.30494	1.00084	1.60904	21.4012	8.96434	2.32959e-08	6.35029e-08	9.07847	12	up	7.19721
WG30786	TvsR	MNAR	3.00609	2.41308	3.5991	20.0659	10.8337	2.33615e-08	6.35249e-08	9.64838	7	up	7.19706
WG07594	TvsR	MNAR	3.31856	2.66345	3.97367	18.1222	10.826	2.35772e-08	6.39538e-08	9.63936	7	up	7.19413
WG05451	TvsR	complete	1.37482	1.0541	1.69554	20.3737	8.95484	2.36916e-08	6.41067e-08	9.06119	12	up	7.1931
WG30974	TvsR	MNAR	-2.71974	-3.25824	-2.18124	19.9718	-10.7938	2.45108e-08	6.60626e-08	9.60127	7	down	7.18004
WG19350	TvsR	complete	-2.2228	-2.74249	-1.70312	21.5184	-8.93517	2.45341e-08	6.60626e-08	9.02533	12	down	7.18004
WG08322	TvsR	complete	1.18349	0.906509	1.46047	19.787	8.92601	2.4937e-08	6.69842e-08	9.00862	12	up	7.17403
WG24032	TvsR	complete	1.31432	1.00665	1.62199	19.6916	8.92397	2.50279e-08	6.70649e-08	9.00489	12	up	7.1735
WG22098	MvsR	complete	1.80324	1.42905	2.17743	20.5299	10.0671	3.5452e-09	6.72344e-08	11.2471	12	up	7.17241
WG28884	MvsR	complete	1.89013	1.49733	2.28293	20.4334	10.0523	3.63295e-09	6.77107e-08	11.2225	12	up	7.16934
WG31941	TvsR	complete	1.21249	0.928226	1.49676	20.1503	8.91035	2.56418e-08	6.84315e-08	8.98002	12	up	7.16474
WG27637	TvsR	MNAR	4.3981	3.79549	5.0007	21.4149	16.3653	2.61996e-08	6.96973e-08	9.64172	7	up	7.15678
WG04744	TvsR	complete	1.55649	1.19096	1.92202	19.9926	8.89545	2.63318e-08	6.98805e-08	8.95278	12	up	7.15564
WG23435	TvsR	MAR	1.74533	1.35625	2.13441	19.9726	9.4415	2.68563e-08	7.11016e-08	9.12685	10	up	7.14812
WG26494	MvsR	complete	2.30648	1.82497	2.78798	20.0183	10.0067	3.91626e-09	7.17539e-08	11.147	12	up	7.14415
WG06021	TvsR	complete	-1.33174	-1.64512	-1.01836	21.4099	-8.87741	2.71924e-08	7.18191e-08	8.91978	12	down	7.14376
WG26503	TvsR	complete	2.61679	1.99841	3.23516	20.6842	8.84007	2.9069e-08	7.65922e-08	8.8513	12	up	7.11582
WG01043	TvsR	complete	1.13217	0.864338	1.40001	20.6159	8.83051	2.95706e-08	7.77284e-08	8.83375	12	up	7.10942
WG27132	TvsM	complete	-2.37255	-2.84665	-1.89846	20.7371	-10.4543	1.89284e-09	7.82043e-08	11.7347	12	down	7.10677
WG09599	TvsR	complete	1.4208	1.08444	1.75717	21.608	8.82398	2.99189e-08	7.84571e-08	8.82173	12	up	7.10537
WG13694	TvsR	complete	1.08402	0.827271	1.34077	20.2557	8.81999	3.01337e-08	7.88331e-08	8.81439	12	up	7.10329
WG26706	MvsR	complete	1.69458	1.33798	2.05118	20.2882	9.9271	4.46713e-09	7.93687e-08	11.0145	12	up	7.10035
WG24522	MvsR	complete	1.65165	1.30403	1.99927	20.1672	9.92553	4.47871e-09	7.93687e-08	11.0119	12	up	7.10035
WG17222	TvsR	MNAR	2.94801	2.35244	3.54358	20.9121	10.5787	3.18485e-08	8.31223e-08	9.34405	7	up	7.08028
WG06507	TvsR	complete	1.32055	1.00634	1.63476	19.4751	8.77951	3.24036e-08	8.43717e-08	8.73987	12	up	7.0738
WG27618	TvsR	MNAR	3.43079	2.73544	4.12615	19.2243	10.5444	3.32183e-08	8.62894e-08	9.30263	7	up	7.06404
WG30790	TvsR	complete	1.88053	1.43182	2.32924	19.78	8.75492	3.38694e-08	8.77742e-08	8.69448	12	up	7.05663
WG09109	TvsR	complete	1.81385	1.38084	2.24687	20.7403	8.75068	3.41288e-08	8.8154e-08	8.68665	12	up	7.05476
WG13437	TvsR	complete	1.1481	0.873995	1.4222	19.8099	8.74992	3.41756e-08	8.8154e-08	8.68524	12	up	7.05476
WG32433	TvsR	complete	1.40359	1.06824	1.73895	20.1008	8.74345	3.45763e-08	8.89795e-08	8.67328	12	up	7.05071
WG17585	MvsR	complete	-1.5535	-1.88312	-1.22389	20.587	-9.8457	5.11474e-09	8.9178e-08	10.8783	12	down	7.04974
WG22009	MvsR	complete	1.37131	1.07911	1.6635	19.8677	9.80389	5.48472e-09	9.41108e-08	10.8079	12	up	7.02636
WG27761	TvsM	complete	-1.81579	-2.18347	-1.44812	19.756	-10.3168	2.36085e-09	9.50392e-08	11.5092	12	down	7.0221
WG21756	TvsR	complete	1.41234	1.07214	1.75254	20.4656	8.67258	3.92978e-08	1.00547e-07	8.54194	12	up	6.99763
WG13624	TvsR	MAR	3.80328	2.9332	4.67336	21.0738	9.20024	3.93446e-08	1.00547e-07	8.73481	10	up	6.99763
WG01498	MvsR	MAR	1.54257	1.22018	1.86497	20.6754	10.0308	6.32906e-09	1.05257e-07	10.7281	11	up	6.97775
WG30043	MvsR	complete	1.22842	0.964067	1.49277	20.2738	9.70745	6.44834e-09	1.05616e-07	10.6449	12	up	6.97627
WG02613	TvsR	complete	2.25503	1.70945	2.8006	20.017	8.63452	4.21053e-08	1.07354e-07	8.47114	12	up	6.96918
WG14440	TvsR	complete	-1.059	-1.3154	-0.802598	20.122	-8.62817	4.25931e-08	1.08347e-07	8.45933	12	down	6.96518
WG17376	TvsR	complete	1.42861	1.0826	1.77462	21.3852	8.6252	4.28237e-08	1.08683e-07	8.45379	12	up	6.96384
WG04591	TvsR	complete	1.13935	0.863357	1.41535	20.0735	8.62373	4.29381e-08	1.08724e-07	8.45105	12	up	6.96367
WG20687	TvsR	complete	2.01434	1.52574	2.50294	19.3302	8.61237	4.3834e-08	1.10739e-07	8.42986	12	up	6.9557
WG15205	TvsR	complete	1.35287	1.02462	1.68112	19.1977	8.60983	4.40372e-08	1.10998e-07	8.42511	12	up	6.95468
WG27308	MvsR	complete	2.38882	1.87178	2.90586	21.599	9.65163	7.0852e-09	1.12634e-07	10.55	12	up	6.94833
WG12282	TvsR	complete	1.49605	1.13215	1.85996	20.6959	8.58812	4.58121e-08	1.15208e-07	8.38457	12	up	6.93852
WG12901	TvsR	complete	-1.65731	-2.06091	-1.25371	21.1099	-8.57815	4.66522e-08	1.16754e-07	8.36593	12	down	6.93273
WG10903	TvsR	complete	1.07189	0.810417	1.33337	20.0163	8.56372	4.78957e-08	1.19361e-07	8.33894	12	up	6.92314
WG14839	TvsR	MNAR	2.78767	2.2327	3.34264	22.2023	10.8069	4.85838e-08	1.20803e-07	8.97793	7	up	6.91792
WG18900	MvsR	MAR	2.65815	2.11136	3.20494	19.6741	10.232	8.04736e-09	1.25388e-07	10.5526	10	up	6.90174
WG27273	MvsR	complete	1.72632	1.34954	2.10311	20.4209	9.57126	8.11949e-09	1.25388e-07	10.4127	12	up	6.90174
WG29464	TvsR	complete	1.16426	0.877916	1.45059	19.7041	8.49394	5.44162e-08	1.35001e-07	8.20799	12	up	6.86966
WG21480	TvsR	complete	1.1161	0.840998	1.3912	20.5002	8.4752	5.63191e-08	1.39409e-07	8.17272	12	up	6.85571
WG12693	MvsR	MAR	1.89884	1.50469	2.29298	20.7782	10.1398	9.22855e-09	1.40508e-07	10.4159	10	up	6.8523
WG09772	TvsR	MAR	2.23178	1.70773	2.75583	20.349	8.96357	5.76032e-08	1.42268e-07	8.34333	10	up	6.84689
WG26178	TvsR	MAR	1.61461	1.22488	2.00433	20.031	8.68536	5.85474e-08	1.44278e-07	8.22236	11	up	6.8408
WG23844	TvsR	MNAR	3.66525	2.888	4.44251	19.6738	10.078	5.95579e-08	1.46441e-07	8.72686	7	up	6.83434
WG09240	TvsR	complete	1.18659	0.89292	1.48026	20.6851	8.44079	5.99973e-08	1.47193e-07	8.10782	12	up	6.83211
WG11634	TvsR	complete	1.25423	0.942997	1.56546	21.7794	8.41846	6.25162e-08	1.53033e-07	8.06563	12	up	6.81521
WG13711	TvsR	complete	1.19912	0.901028	1.49721	20.4129	8.4034	6.42774e-08	1.56996e-07	8.03713	12	up	6.80411
WG23689	TvsR	complete	1.04316	0.78375	1.30258	19.803	8.40043	6.46304e-08	1.5751e-07	8.03151	12	up	6.80269
WG03100	TvsR	complete	-1.51473	-1.89158	-1.13788	20.6181	-8.39671	6.50758e-08	1.58246e-07	8.02446	12	down	6.80067
WG22157	MvsR	complete	2.06802	1.60785	2.52819	20.7867	9.38807	1.11083e-08	1.65403e-07	10.0968	12	up	6.78146
WG04353	MvsR	complete	1.64004	1.27498	2.0051	20.9463	9.38487	1.11697e-08	1.65403e-07	10.0912	12	up	6.78146
WG13627	TvsR	complete	1.34029	1.00538	1.67519	20.2827	8.3603	6.96054e-08	1.68889e-07	7.95543	12	up	6.7724
WG27086	MvsR	complete	2.57129	1.99718	3.1454	19.7014	9.3561	1.17377e-08	1.70544e-07	10.0412	12	up	6.76816
WG15585	MvsR	complete	2.54288	1.97483	3.11093	19.6276	9.35145	1.18323e-08	1.70544e-07	10.0331	12	up	6.76816
WG27934	TvsM	complete	-1.69224	-2.04813	-1.33634	20.9847	-9.93295	4.42398e-09	1.73641e-07	10.8679	12	down	6.76035
WG00788	MvsR	complete	1.50589	1.16873	1.84305	20.2372	9.33043	1.22698e-08	1.74522e-07	9.99649	12	up	6.75815
WG10407	MvsR	complete	1.2384	0.960728	1.51608	20.0073	9.31678	1.2563e-08	1.75591e-07	9.97267	12	up	6.7555
WG11677	MvsR	complete	1.858	1.44118	2.27482	21.9971	9.31189	1.26699e-08	1.75591e-07	9.96413	12	up	6.7555
WG31450	TvsM	complete	1.22601	0.967139	1.48488	21.1756	9.89362	4.72247e-09	1.80836e-07	10.8012	12	up	6.74272
WG26891	MvsR	complete	1.40259	1.08702	1.71817	20.668	9.28473	1.32804e-08	1.81723e-07	9.91665	12	up	6.74059
WG30221	TvsR	complete	1.49582	1.11983	1.87181	20.9757	8.31083	7.62924e-08	1.84304e-07	7.86133	12	up	6.73447
WG11753	MvsR	complete	1.67362	1.29611	2.05114	21.3898	9.26121	1.38338e-08	1.8693e-07	9.87547	12	up	6.72832
WG16268	MvsR	complete	2.04324	1.58182	2.50465	19.3874	9.25053	1.40928e-08	1.87473e-07	9.85675	12	up	6.72706
WG22260	MvsR	complete	1.61394	1.24926	1.97861	20.0005	9.24533	1.42209e-08	1.87473e-07	9.84763	12	up	6.72706
WG14112	MvsR	complete	1.5616	1.20797	1.91522	20.884	9.22504	1.47321e-08	1.91872e-07	9.812	12	up	6.71699
WG19046	MvsR	MAR	2.54231	1.98088	3.10374	20.4544	9.49321	1.50064e-08	1.93118e-07	9.8606	11	up	6.71418
WG20975	MvsR	complete	2.25298	1.74179	2.76418	20.0551	9.20688	1.52059e-08	1.93383e-07	9.78006	12	up	6.71358
WG00766	TvsR	complete	1.61474	1.20692	2.02256	20.8495	8.27131	8.21114e-08	1.97928e-07	7.78593	12	up	6.70349
WG18674	TvsR	complete	1.25646	0.938905	1.57401	19.6907	8.26561	8.29882e-08	1.99605e-07	7.77504	12	up	6.69983
WG12840	TvsR	complete	1.55566	1.16216	1.94916	20.4938	8.25869	8.40652e-08	2.01757e-07	7.76181	12	up	6.69517
WG23112	TvsM	complete	1.64055	1.29017	1.99094	19.9692	9.78099	5.69908e-09	2.10207e-07	10.6092	12	up	6.67735
WG03991	TvsM	complete	2.39443	1.9697	2.81915	20.3026	12.0484	5.75726e-09	2.10207e-07	10.9247	12	up	6.67735
WG29214	TvsR	complete	-2.08235	-2.59908	-1.56561	20.3687	-8.44822	8.86538e-08	2.12308e-07	7.75831	12	down	6.67303
WG03114	MvsR	complete	1.36025	1.04912	1.67139	20.9576	9.1329	1.73056e-08	2.17528e-07	9.64953	12	up	6.66248
WG12080	TvsM	complete	2.02515	1.66437	2.38593	20.1443	11.9964	6.09784e-09	2.17582e-07	10.8658	12	up	6.66238
WG11636	TvsR	complete	2.54334	1.89578	3.1909	20.2036	8.20477	9.29708e-08	2.22164e-07	7.65852	12	up	6.65333
WG18684	TvsR	MAR	2.42308	1.81969	3.02646	21.3496	8.41883	9.33783e-08	2.22656e-07	7.74298	11	up	6.65237
WG12769	MvsR	complete	1.27743	0.984254	1.5706	20.44	9.10232	1.82597e-08	2.24831e-07	9.59537	12	up	6.64814
WG18270	MvsR	complete	1.21217	0.933933	1.49041	20.7242	9.10098	1.83026e-08	2.24831e-07	9.593	12	up	6.64814
WG10425	TvsR	MAR	2.15138	1.6286	2.67417	19.4831	8.66157	9.46154e-08	2.25119e-07	7.83361	10	up	6.64759
WG30769	TvsR	MAR	1.56605	1.1849	1.94721	19.4769	8.64776	9.68128e-08	2.29852e-07	7.7613	11	up	6.63855
WG28245	TvsR	MAR	1.53761	1.16237	1.91285	19.5384	8.62465	1.0061e-07	2.37844e-07	7.77051	10	up	6.62371
WG16613	MvsR	complete	1.36434	1.04961	1.67907	21.5151	9.05584	1.9816e-08	2.40686e-07	9.51281	12	up	6.61855
WG03129	TvsR	MNAR	2.42512	1.88855	2.96169	19.992	9.65918	1.02425e-07	2.41619e-07	8.18981	7	up	6.61687
WG12597	TvsR	complete	1.72976	1.28622	2.17331	20.1694	8.14684	1.0364e-07	2.43962e-07	7.5471	12	up	6.61268
WG31286	TvsR	complete	1.78236	1.32498	2.23975	20.5412	8.14061	1.04859e-07	2.46307e-07	7.5351	12	up	6.60852
WG14250	MvsR	complete	1.1839	0.90996	1.45784	20.6344	9.02817	2.0807e-08	2.4941e-07	9.46354	12	up	6.60309
WG19765	MvsR	complete	1.51087	1.16094	1.8608	19.6262	9.01959	2.11248e-08	2.4941e-07	9.44824	12	up	6.60309
WG26019	MvsR	complete	1.227	0.942674	1.51132	20.5421	9.0151	2.12932e-08	2.4941e-07	9.44023	12	up	6.60309
WG18692	MvsR	MAR	3.01351	2.33247	3.69455	21.9145	9.27644	2.14571e-08	2.4941e-07	9.5007	11	up	6.60309
WG12553	MvsR	complete	-1.48669	-1.79187	-1.18151	20.9352	-10.3511	2.23274e-08	2.56765e-07	9.6003	12	down	6.59046
WG16636	TvsR	MNAR	-4.00947	-4.9028	-3.11613	19.7651	-9.59193	1.11927e-07	2.62351e-07	8.10173	7	down	6.58112
WG13751	TvsR	MAR	1.76743	1.31991	2.21496	21.1913	8.27953	1.19612e-07	2.79179e-07	7.48874	11	up	6.55412
WG22969	TvsR	complete	1.74216	1.29096	2.19336	23.0991	8.06605	1.20678e-07	2.81072e-07	7.39099	12	up	6.55118
WG00204	TvsR	complete	1.14998	0.851815	1.44815	19.2684	8.05702	1.22755e-07	2.85308e-07	7.37349	12	up	6.54469
WG08180	MvsR	MAR	1.84993	1.43923	2.26062	20.297	9.48069	2.52574e-08	2.87402e-07	9.40875	10	up	6.54151
WG19292	TvsR	complete	1.16996	0.866355	1.47356	19.4511	8.05019	1.24352e-07	2.87808e-07	7.36024	12	up	6.5409
WG13868	TvsR	complete	1.12142	0.829834	1.413	21.1764	8.03426	1.28158e-07	2.95378e-07	7.32932	12	up	6.52962
WG26242	TvsR	complete	1.11297	0.823538	1.40241	19.8812	8.03292	1.28484e-07	2.95512e-07	7.32672	12	up	6.52942
WG25408	MvsR	MAR	1.44188	1.12073	1.76303	22.3066	9.44972	2.65123e-08	2.9854e-07	9.36015	10	up	6.525
WG16551	TvsR	complete	-1.27373	-1.60528	-0.942179	20.3158	-8.02541	1.30325e-07	2.99123e-07	7.31212	12	down	6.52415
WG04960	TvsR	MAR	3.62904	2.75196	4.50612	18.3101	8.7476	1.30697e-07	2.99355e-07	7.56124	10	up	6.52381
WG25848	MvsR	MAR	4.38248	3.37703	5.38793	21.3935	9.13778	2.70506e-08	3.01009e-07	9.26738	11	up	6.52142
WG22890	MvsR	complete	1.64256	1.25595	2.02916	19.9932	8.87544	2.72885e-08	3.01009e-07	9.18973	12	up	6.52142
WG31061	TvsR	MNAR	2.58919	2.00483	3.17355	19.6869	9.46927	1.3174e-07	3.0112e-07	7.93978	7	up	6.52126
WG07064	TvsR	complete	2.20901	1.63333	2.78469	19.4628	8.016	1.3267e-07	3.02619e-07	7.29383	12	up	6.5191
WG02193	MvsR	MAR	2.38176	1.84952	2.914	21.1	9.41871	2.78346e-08	3.03931e-07	9.31136	10	up	6.51722
WG08879	TvsR	complete	2.62331	1.93909	3.30754	20.0945	8.00922	1.34386e-07	3.05901e-07	7.28065	12	up	6.51442
WG22220	MvsR	complete	1.90135	1.45256	2.35013	19.9165	8.85044	2.85348e-08	3.08461e-07	9.14462	12	up	6.5108
WG09085	TvsR	MAR	1.63229	1.2251	2.03948	20.3136	8.43723	1.37789e-07	3.13003e-07	7.44744	10	up	6.50445
WG06187	MvsR	complete	1.64185	1.25343	2.03026	20.128	8.83041	2.95762e-08	3.16049e-07	9.10841	12	up	6.50025
WG07114	MvsR	complete	1.68099	1.28311	2.07887	20.8622	8.8258	2.98214e-08	3.16049e-07	9.10007	12	up	6.50025
WG11963	TvsR	MAR	2.38307	1.77272	2.99342	19.9603	8.1854	1.41596e-07	3.2099e-07	7.31549	11	up	6.49351
WG05673	TvsM	complete	1.45157	1.18422	1.71892	19.0506	11.6035	9.48286e-09	3.30846e-07	10.4126	12	up	6.48037
WG13749	TvsR	MAR	2.02492	1.50426	2.54558	20.0258	8.1533	1.50021e-07	3.38698e-07	7.25614	11	up	6.47019
WG27379	MvsR	complete	1.68836	1.28669	2.09003	20.502	8.7808	3.23289e-08	3.39296e-07	9.01852	12	up	6.46942
WG32306	TvsR	MAR	1.71804	1.28647	2.1496	19.9697	8.37893	1.52087e-07	3.42662e-07	7.34601	10	up	6.46513
WG15712	MvsR	MAR	2.81269	2.17652	3.44887	20.2001	9.30566	3.32707e-08	3.45823e-07	9.13245	10	up	6.46115
WG10083	TvsR	complete	2.27192	1.67344	2.8704	20.3351	7.93021	1.56179e-07	3.51165e-07	7.12654	12	up	6.45449
WG15200	TvsR	MAR	2.10429	1.56149	2.64708	20.3138	8.12738	1.57205e-07	3.52753e-07	7.20812	11	up	6.45253
WG13679	MvsR	MAR	2.36462	1.82749	2.90175	20.4796	9.2658	3.54429e-08	3.64893e-07	9.06899	10	up	6.43783
WG01082	TvsR	MNAR	3.96827	3.05711	4.87943	19.2853	9.30768	1.63685e-07	3.66301e-07	7.72376	7	up	6.43616
WG05493	TvsR	complete	1.42245	1.04655	1.79836	20.1036	7.90492	1.63906e-07	3.66301e-07	7.07702	12	up	6.43616
WG06279	MvsR	MAR	1.27277	0.974004	1.57153	19.4337	8.93101	3.83771e-08	3.84557e-07	8.91487	11	up	6.41504
WG00945	MvsR	complete	1.21331	0.921285	1.50534	20.085	8.67944	3.88127e-08	3.84557e-07	8.83384	12	up	6.41504
WG12617	MvsR	complete	-1.93354	-2.39906	-1.46802	20.0239	-8.67677	3.90009e-08	3.84557e-07	8.82896	12	down	6.41504
WG24156	MvsR	complete	-1.29009	-1.60072	-0.979454	21.1163	-8.67589	3.90625e-08	3.84557e-07	8.82736	12	down	6.41504
WG11178	MvsR	complete	1.40696	1.06815	1.74577	20.9252	8.67492	3.91316e-08	3.84557e-07	8.82558	12	up	6.41504
WG06325	MvsR	complete	1.56784	1.18917	1.94652	20.7494	8.64915	4.10021e-08	3.99309e-07	8.77839	12	up	6.39869
WG09247	TvsR	MAR	-1.46222	-1.84293	-1.08152	19.0805	-8.052	1.80201e-07	4.00285e-07	7.06796	11	down	6.39763
WG06672	MvsR	complete	1.39491	1.05736	1.73246	20.4007	8.63271	4.22434e-08	4.07724e-07	8.74826	12	up	6.38963
WG13820	TvsR	complete	1.02036	0.748544	1.29218	20.0768	7.84184	1.84951e-07	4.0919e-07	6.95317	12	up	6.38807
WG24992	MvsR	complete	1.49598	1.13352	1.85844	20.2435	8.62198	4.30755e-08	4.12076e-07	8.72854	12	up	6.38502
WG30622	MvsR	complete	1.24134	0.940172	1.54251	20.7594	8.6104	4.39913e-08	4.17146e-07	8.70728	12	up	6.37971
WG04771	TvsR	MAR	1.64675	1.2166	2.07691	19.307	8.02571	1.89018e-07	4.17353e-07	7.01891	11	up	6.3795
WG12132	TvsM	MNAR	-3.70205	-4.39717	-3.00693	21.209	-11.382	1.22295e-08	4.17398e-07	10.2471	7	down	6.37945
WG24567	TvsM	complete	1.27634	0.990199	1.56248	20.0905	9.31808	1.25347e-08	4.18714e-07	9.80374	12	up	6.37808
WG13119	TvsR	MNAR	2.91573	2.23701	3.59444	20.3764	9.18106	1.94418e-07	4.28417e-07	7.55234	7	up	6.36813
WG15596	MvsR	MAR	1.6056	1.22435	1.98686	20.6477	8.82887	4.57032e-08	4.2961e-07	8.73869	11	up	6.36693
WG27292	TvsR	complete	1.13714	0.832725	1.44155	21.1054	7.80352	1.99084e-07	4.37825e-07	6.87768	12	up	6.3587
WG03494	TvsR	complete	1.14607	0.839174	1.45297	20.4914	7.80114	1.99999e-07	4.38963e-07	6.87298	12	up	6.35757
WG06352	MvsR	complete	-1.98733	-2.43471	-1.53995	20.2411	-9.39141	4.86218e-08	4.42642e-07	8.7549	12	down	6.35395
WG01248	MvsR	MAR	2.35012	1.7897	2.91054	19.78	8.79136	4.87475e-08	4.42642e-07	8.67365	11	up	6.35395
WG17318	MvsR	MAR	2.19889	1.6884	2.70939	22.248	9.06594	4.88063e-08	4.42642e-07	8.74781	10	up	6.35395
WG16254	MvsR	MAR	1.79609	1.36761	2.22457	19.7243	8.78769	4.90566e-08	4.42642e-07	8.66727	11	up	6.35395
WG12132	MvsR	complete	-1.77852	-2.15008	-1.40697	21.209	-10.2298	4.9137e-08	4.42642e-07	8.86607	12	down	6.35395
WG14148	TvsM	complete	1.73196	1.3513	2.11262	20.5569	9.53851	1.39359e-08	4.55819e-07	9.74855	12	up	6.34121
WG14371	MvsR	complete	1.51552	1.14411	1.88694	20.8467	8.52404	5.14968e-08	4.60067e-07	8.54807	12	up	6.33718
WG13993	MvsR	complete	1.47938	1.11631	1.84246	20.2965	8.5119	5.26539e-08	4.66548e-07	8.5256	12	up	6.3311
WG12532	TvsM	complete	1.74633	1.35116	2.1415	19.8993	9.23174	1.45613e-08	4.66555e-07	9.65055	12	up	6.3311
WG31317	MvsR	complete	1.3046	0.984024	1.62519	20.6878	8.50126	5.3691e-08	4.7187e-07	8.50589	12	up	6.32618
WG18077	TvsM	complete	1.67975	1.35893	2.00057	20.1931	11.1897	1.53004e-08	4.80434e-07	9.92073	12	up	6.31837
WG09906	TvsR	complete	1.25874	0.926447	1.59104	21.0778	7.94131	2.20494e-07	4.82988e-07	6.8217	12	up	6.31606
WG11741	TvsR	complete	1.67376	1.22201	2.12551	20.4285	7.73991	2.25068e-07	4.9203e-07	6.75191	12	up	6.30801
WG17430	MvsR	complete	2.35264	1.77239	2.93289	20.9817	8.46995	5.68652e-08	4.95736e-07	8.44782	12	up	6.30475
WG00438	TvsR	complete	-1.52884	-1.94203	-1.11565	20.4806	-7.72952	2.29638e-07	5.01028e-07	6.73131	12	down	6.30014
WG14846	MvsR	MAR	2.09598	1.60348	2.58849	20.6629	8.95729	5.81943e-08	5.03265e-07	8.57106	10	up	6.2982
WG12790	MvsR	complete	2.03763	1.5334	2.54186	20.4958	8.44189	5.9876e-08	5.13698e-07	8.39567	12	up	6.28929
WG19578	TvsR	MNAR	3.22576	2.46315	3.98838	21.0533	9.03987	2.36022e-07	5.13942e-07	7.35893	7	up	6.28909
WG21896	TvsR	complete	1.43415	1.06246	1.80583	18.8334	8.1212	2.36523e-07	5.14019e-07	6.80319	12	up	6.28902
WG16084	MvsR	complete	1.28128	0.96347	1.59909	22.0907	8.42201	6.21081e-08	5.28652e-07	8.35867	12	up	6.27683
WG22839	TvsR	complete	-2.37433	-3.01895	-1.7297	20.0604	-7.6944	2.45801e-07	5.33132e-07	6.66159	12	down	6.27316
WG15200	MvsR	MAR	2.23688	1.69409	2.77968	20.3138	8.6395	6.34028e-08	5.35457e-07	8.40843	11	up	6.27128
WG19761	TvsM	MAR	2.08761	1.72652	2.44871	23.1648	12.535	1.81855e-08	5.49243e-07	9.9567	10	up	6.26024
WG08964	TvsM	complete	1.69509	1.36704	2.02314	19.7592	11.043	1.81915e-08	5.49243e-07	9.74262	12	up	6.26024
WG08063	TvsR	complete	1.10165	0.801747	1.40156	20.2386	7.67364	2.55902e-07	5.53953e-07	6.62031	12	up	6.25653
WG13602	MvsR	MNAR	2.99072	2.35082	3.63061	19.6866	9.98851	6.67761e-08	5.59573e-07	8.48213	7	up	6.25214
WG11047	MvsR	complete	1.44548	1.08492	1.80604	19.9485	8.37476	6.77682e-08	5.63518e-07	8.27048	12	up	6.24909
WG06978	TvsR	complete	1.22217	0.888647	1.5557	20.5297	7.65501	2.65335e-07	5.73249e-07	6.5832	12	up	6.24166
WG12664	MvsR	complete	1.28686	0.965127	1.60858	21.2256	8.35568	7.02042e-08	5.7493e-07	8.23477	12	up	6.24038
WG05189	TvsR	MNAR	3.48995	2.68964	4.29026	18.8264	9.38175	2.67175e-07	5.76097e-07	7.29237	7	up	6.2395
WG32434	MvsR	complete	1.4763	1.10692	1.84567	21.33	8.34928	7.10412e-08	5.7741e-07	8.22279	12	up	6.23852
WG13508	TvsR	MAR	1.79336	1.31321	2.27352	19.882	7.83016	2.70472e-07	5.82069e-07	6.65107	11	up	6.23503
WG05454	TvsM	complete	-1.73756	-2.13863	-1.33649	21.702	-9.0503	2.00104e-08	5.92761e-07	9.32556	12	down	6.22712
WG08191	TvsR	complete	1.29908	0.943194	1.65496	20.7111	7.62549	2.81024e-07	6.03599e-07	6.52433	12	up	6.21925
WG23498	TvsR	MAR	1.73226	1.30232	2.16219	20.9366	8.5613	2.81748e-07	6.03981e-07	6.86264	9	up	6.21898
WG20056	MvsR	complete	1.19132	0.892157	1.49048	20.2542	8.31884	7.51653e-08	6.06371e-07	8.16573	12	up	6.21726
WG07382	TvsR	complete	1.38352	1.00411	1.76294	20.46	7.61747	2.85449e-07	6.10729e-07	6.50831	12	up	6.21415
WG11726	TvsR	complete	1.13602	0.82425	1.4478	19.4912	7.61185	2.88599e-07	6.16273e-07	6.49707	12	up	6.21023
WG26515	MvsR	MAR	1.51042	1.14797	1.87287	20.9393	8.7711	7.89295e-08	6.32021e-07	8.26466	10	up	6.19927
WG19350	TvsM	complete	-2.23521	-2.75489	-1.71553	21.5184	-8.98506	2.24558e-08	6.41012e-07	9.20768	12	down	6.19313
WG18057	MvsR	complete	1.28049	0.957286	1.6037	20.8822	8.27633	8.13469e-08	6.46588e-07	8.08581	12	up	6.18937
WG02521	TvsR	complete	3.09902	2.2456	3.95243	21.086	7.58586	3.03611e-07	6.47078e-07	6.4451	12	up	6.18904
WG05818	MvsR	MAR	1.8518	1.39384	2.30975	20.3322	8.47719	8.42398e-08	6.64695e-07	8.12158	11	up	6.17738
WG11470	MvsR	MAR	2.01285	1.5273	2.49839	19.7171	8.72535	8.51224e-08	6.66792e-07	8.18869	10	up	6.17601
WG26652	TvsR	complete	1.06174	0.768263	1.35522	21.3521	7.55761	3.20857e-07	6.82517e-07	6.38848	12	up	6.16589
WG02313	TvsR	MNAR	2.17296	1.64627	2.69965	20.2514	8.81718	3.21894e-07	6.83405e-07	7.04899	7	up	6.16532
WG28554	MvsR	complete	1.28988	0.962211	1.61756	19.8244	8.22342	8.97857e-08	6.98261e-07	7.98598	12	up	6.15598
WG05937	TvsR	complete	1.52464	1.10148	1.94779	21.6085	7.52676	3.40854e-07	7.2227e-07	6.32652	12	up	6.1413
WG00187	TvsM	complete	1.09528	0.837856	1.35271	20.9697	8.88816	2.66762e-08	7.42359e-07	9.03159	12	up	6.12939
WG15496	TvsM	complete	1.12633	0.861405	1.39126	21.0918	8.88133	2.70029e-08	7.42359e-07	9.01914	12	up	6.12939
WG25559	TvsM	MAR	1.93011	1.58397	2.27624	19.038	12.0902	2.7711e-08	7.42359e-07	9.5347	10	up	6.12939
WG05491	TvsM	complete	1.94157	1.5533	2.32983	19.6323	10.6871	2.78976e-08	7.42359e-07	9.30218	12	up	6.12939
WG25736	TvsR	complete	1.36361	0.984156	1.74307	19.2505	7.50708	3.54277e-07	7.49275e-07	6.28695	12	up	6.12536
WG09231	MvsR	MNAR	2.62924	2.04842	3.21007	20.7923	9.6743	1.0041e-07	7.64392e-07	8.10805	7	up	6.11668
WG02164	TvsM	complete	1.38946	1.06849	1.71043	19.4451	9.07525	3.00517e-08	7.86354e-07	8.96156	12	up	6.10438
WG06838	MvsR	complete	2.06282	1.53355	2.5921	21.2046	8.14183	1.0462e-07	7.90865e-07	7.83133	12	up	6.1019
WG14760	TvsR	complete	1.28414	0.924805	1.64347	19.9685	7.46543	3.84517e-07	8.11676e-07	6.20302	12	up	6.09062
WG16074	MvsR	MNAR	2.28494	1.7768	2.79309	20.5991	9.61005	1.09278e-07	8.14685e-07	8.03012	7	up	6.08901
WG06174	TvsR	complete	1.22323	0.880357	1.56609	19.2722	7.45282	3.94195e-07	8.30519e-07	6.17755	12	up	6.08065
WG31424	TvsM	complete	1.73299	1.38253	2.08346	20.3509	10.5678	3.22763e-08	8.30718e-07	9.15189	12	up	6.08055
WG26312	TvsR	MAR	2.0151	1.46097	2.56922	18.6816	7.62374	3.96983e-07	8.34798e-07	6.25726	11	up	6.07842
WG31557	MvsR	complete	1.43813	1.06698	1.80928	20.5402	8.09441	1.14388e-07	8.45183e-07	7.74103	12	up	6.07305
WG15340	MvsR	MAR	1.96805	1.48329	2.4528	20.3012	8.54501	1.14932e-07	8.45183e-07	7.88652	10	up	6.07305
WG26499	TvsM	complete	1.15661	0.87978	1.43345	19.2377	8.72795	3.55559e-08	9.00366e-07	8.73778	12	up	6.04558
WG20848	MvsR	complete	1.2793	0.94741	1.61119	19.3937	8.05233	1.23849e-07	9.04601e-07	7.66064	12	up	6.04354
WG27448	TvsR	complete	1.31683	0.945284	1.68837	19.6835	7.40389	4.34188e-07	9.11299e-07	6.07855	12	up	6.04034
WG22958	TvsR	complete	1.00819	0.723126	1.29326	19.7343	7.38823	4.47854e-07	9.38199e-07	6.04681	12	up	6.02771
WG19392	TvsR	complete	1.1706	0.839374	1.50182	20.4305	7.38289	4.52614e-07	9.46375e-07	6.03598	12	up	6.02394
WG29922	MvsR	complete	1.2149	0.898633	1.53116	20.6358	8.02475	1.30488e-07	9.46695e-07	7.60781	12	up	6.02379
WG26110	MvsR	complete	-2.1786	-2.74671	-1.6105	21.688	-8.01108	1.33913e-07	9.65066e-07	7.5816	12	down	6.01544
WG20701	MvsR	complete	1.07697	0.79595	1.35799	20.0587	8.00583	1.35253e-07	9.6827e-07	7.57152	12	up	6.014
WG26526	MvsR	complete	1.54266	1.13923	1.94609	20.5157	7.98806	1.39894e-07	9.94905e-07	7.53739	12	up	6.00222
WG12904	TvsR	MAR	1.84819	1.34334	2.35305	21.3554	7.70516	4.91276e-07	1.02527e-06	6.14147	10	up	5.98916
WG17441	MvsR	complete	3.01249	2.22229	3.80269	23.1821	7.96396	1.46455e-07	1.03475e-06	7.49102	12	up	5.98516
WG00519	TvsR	MNAR	2.85844	2.14015	3.57673	19.8359	8.50479	5.0217e-07	1.04449e-06	6.60384	7	up	5.9811
WG22174	TvsR	MAR	1.83942	1.32516	2.35367	19.7506	7.49857	5.02376e-07	1.04449e-06	6.01566	11	up	5.9811
WG30992	TvsR	complete	1.24397	0.889265	1.59868	20.877	7.32627	5.06443e-07	1.05096e-06	5.92087	12	up	5.97841
WG30569	TvsM	complete	1.05963	0.803046	1.31622	19.8344	8.62709	4.2677e-08	1.06354e-06	8.55111	12	up	5.97325
WG08655	TvsR	complete	1.13477	0.810719	1.45882	19.248	7.31536	5.1755e-07	1.072e-06	5.89865	12	up	5.96981
WG19080	MvsR	complete	-1.78842	-2.24994	-1.3269	19.6325	-8.12384	1.58214e-07	1.10342e-06	7.45701	12	down	5.95726
WG20068	TvsR	MAR	2.68109	1.92793	3.43425	20.5717	7.46283	5.37521e-07	1.11079e-06	5.94629	11	up	5.95437
WG06588	TvsR	MAR	1.1603	0.834282	1.48632	20.0174	7.46117	5.39215e-07	1.11079e-06	5.94307	11	up	5.95437
WG19382	TvsR	complete	1.33664	0.953863	1.71942	19.6255	7.29469	5.39299e-07	1.11079e-06	5.85649	12	up	5.95437
WG07298	MvsR	complete	1.87154	1.37704	2.36603	21.021	7.9064	1.63443e-07	1.12625e-06	7.37998	12	up	5.94837
WG20485	MvsR	complete	-1.55587	-1.96698	-1.14476	21.6963	-7.90599	1.63571e-07	1.12625e-06	7.37918	12	down	5.94837
WG27156	MvsR	MNAR	2.68077	2.06395	3.29759	20.3512	9.28824	1.68048e-07	1.14251e-06	7.63222	7	up	5.94214
WG12629	MvsR	complete	1.54708	1.13714	1.95703	19.1288	7.88366	1.70706e-07	1.15074e-06	7.33598	12	up	5.93902
WG31851	TvsM	complete	1.04692	0.791842	1.302	21.5756	8.57389	4.70153e-08	1.15334e-06	8.45211	12	up	5.93804
WG13791	TvsM	complete	1.14207	0.863517	1.42063	20.6977	8.56489	4.77937e-08	1.1544e-06	8.43532	12	up	5.93764
WG05066	MvsR	complete	-1.18221	-1.49683	-0.867591	20.4304	-7.84969	1.82187e-07	1.2157e-06	7.27012	12	down	5.91517
WG32152	TvsR	MNAR	3.54542	2.71195	4.37889	19.0019	9.22302	5.99968e-07	1.23345e-06	6.5478	7	up	5.90888
WG16794	MvsR	MAR	3.43002	2.55572	4.30432	20.5878	8.25727	1.87137e-07	1.24107e-06	7.39546	10	up	5.9062
WG25146	TvsR	complete	1.12572	0.800486	1.45095	20.0803	7.23065	6.12875e-07	1.25765e-06	5.72552	12	up	5.90044
WG12282	MvsR	complete	1.36174	0.997833	1.72565	20.6959	7.8171	1.93954e-07	1.27844e-06	7.20679	12	up	5.89332
WG17585	TvsM	complete	-1.341	-1.67062	-1.01139	20.587	-8.49893	5.39209e-08	1.28266e-06	8.31197	12	down	5.89189
WG03614	MvsR	MNAR	3.32203	2.54813	4.09592	19.7234	9.17394	1.96318e-07	1.28618e-06	7.4878	7	up	5.8907
WG08338	MvsR	complete	1.4486	1.06078	1.83643	19.4728	7.80293	1.99311e-07	1.29792e-06	7.17922	12	up	5.88675
WG10009	TvsR	complete	1.4194	1.00829	1.83051	18.6088	7.21261	6.35431e-07	1.30151e-06	5.68851	12	up	5.88555
WG09263	MvsR	complete	1.4375	1.05227	1.82274	21.154	7.79511	2.02333e-07	1.30971e-06	7.16399	12	up	5.88282
WG10237	TvsM	complete	1.19642	0.94376	1.44908	20.5481	10.1199	5.64644e-08	1.32312e-06	8.57483	12	up	5.8784
WG08180	TvsM	complete	1.56392	1.19659	1.93126	20.297	8.96099	5.78449e-08	1.33554e-06	8.34617	12	up	5.87434
WG07778	TvsR	complete	1.22773	0.871127	1.58433	19.7587	7.19221	6.61964e-07	1.35335e-06	5.64662	12	up	5.86859
WG20472	TvsR	complete	1.55649	1.10427	2.00872	19.035	7.19006	6.64816e-07	1.35667e-06	5.64222	12	up	5.86753
WG22586	MvsR	MAR	1.5996	1.1785	2.02071	20.1226	7.96346	2.11743e-07	1.35959e-06	7.19031	11	up	5.86659
WG19741	MvsR	complete	1.28666	0.940712	1.6326	19.6889	7.76954	2.12553e-07	1.35959e-06	7.11412	12	up	5.86659
WG15739	MvsR	complete	1.14795	0.839055	1.45684	21.1462	7.76346	2.15064e-07	1.36755e-06	7.10224	12	up	5.86406
WG04581	TvsR	MAR	2.3611	1.6869	3.0353	20.2466	7.34185	6.76648e-07	1.37826e-06	5.71018	11	up	5.86067
WG31418	TvsM	complete	1.25291	0.942054	1.56376	20.5096	8.4199	6.23505e-08	1.4007e-06	8.16343	12	up	5.85366
WG01089	TvsM	complete	1.84191	1.44987	2.23395	20.2932	10.0408	6.24515e-08	1.4007e-06	8.47077	12	up	5.85366
WG07622	MvsR	MAR	-1.63879	-2.05046	-1.22711	21.6901	-8.41596	2.21725e-07	1.40166e-06	7.29117	9	down	5.85336
WG09200	TvsR	complete	1.12898	0.799768	1.45818	19.7739	7.16402	7.00524e-07	1.42165e-06	5.58865	12	up	5.84721
WG06577	TvsR	complete	1.09128	0.772942	1.40961	19.3957	7.1613	7.0436e-07	1.42459e-06	5.58306	12	up	5.84631
WG03127	TvsR	MAR	1.2416	0.886047	1.59716	20.2372	7.32071	7.04555e-07	1.42459e-06	5.66873	11	up	5.84631
WG07594	TvsM	complete	1.63856	1.28839	1.98873	18.1222	10.0004	6.57697e-08	1.45434e-06	8.4173	12	up	5.83733
WG21532	MvsR	MAR	2.53534	1.87863	3.19204	18.1341	8.12582	2.3464e-07	1.46616e-06	7.16742	10	up	5.83382
WG08313	TvsR	MNAR	2.63972	1.95594	3.3235	19.9424	8.25041	7.27402e-07	1.4681e-06	6.23217	7	up	5.83324
WG13694	TvsM	complete	1.02804	0.771288	1.28479	20.2557	8.36448	6.90694e-08	1.48547e-06	8.05878	12	up	5.82814
WG15414	MvsR	complete	-1.81538	-2.24534	-1.38542	19.8424	-9.02341	2.41452e-07	1.50005e-06	7.24946	12	down	5.82389
WG30683	MvsR	complete	1.01578	0.740143	1.29141	20.8409	7.69852	2.43845e-07	1.50626e-06	6.97513	12	up	5.8221
WG17316	TvsM	complete	1.049	0.786445	1.31155	20.682	8.3464	7.1421e-08	1.51528e-06	8.02454	12	up	5.81951
WG13345	TvsR	complete	1.63005	1.15224	2.10787	19.5476	7.12662	7.55287e-07	1.5216e-06	5.5116	12	up	5.8177
WG24571	MvsR	complete	-1.53625	-1.90089	-1.17162	20.1256	-9.00404	2.48012e-07	1.5233e-06	7.22216	12	down	5.81721
WG11893	TvsR	complete	1.13533	0.802288	1.46838	19.7956	7.12135	7.63356e-07	1.53506e-06	5.50072	12	up	5.81388
WG09353	TvsR	MNAR	2.86865	2.12207	3.61523	20.44	8.21173	7.70076e-07	1.54575e-06	6.17493	7	up	5.81086
WG06717	TvsR	complete	1.23736	0.87404	1.60068	20.9573	7.11459	7.73841e-07	1.55049e-06	5.48675	12	up	5.80953
WG03270	MvsR	MAR	3.22751	2.38611	4.06891	21.4588	8.07358	2.56867e-07	1.56877e-06	7.07615	10	up	5.80444
WG19677	MvsR	complete	1.30152	0.946285	1.65676	20.8624	7.65377	2.65976e-07	1.60898e-06	6.88721	12	up	5.79345
WG27733	MvsR	MAR	1.75019	1.29262	2.20775	20.1012	8.05068	2.67295e-07	1.60898e-06	7.03602	10	up	5.79345
WG17336	MvsR	complete	2.08425	1.51383	2.65467	20.4939	7.63302	2.76932e-07	1.65394e-06	6.84636	12	up	5.78148
WG30893	MvsR	complete	1.41188	1.02512	1.79864	20.7378	7.62606	2.80713e-07	1.6582e-06	6.83263	12	up	5.78036
WG05145	TvsM	complete	1.4394	1.12683	1.75196	20.2709	9.84169	8.06983e-08	1.68928e-06	8.20599	12	up	5.7723
WG14208	TvsM	complete	1.28028	1.00169	1.55888	19.6513	9.82111	8.28833e-08	1.71219e-06	8.17839	12	up	5.76645
WG01516	TvsR	complete	1.31958	0.927893	1.71126	20.2449	7.03785	9.0374e-07	1.80421e-06	5.32792	12	up	5.74371
WG16533	TvsR	MNAR	2.20225	1.62083	2.78368	19.8377	8.0948	9.15941e-07	1.82527e-06	6.00067	7	up	5.73867
WG09508	TvsR	MAR	1.84949	1.30928	2.3897	18.4386	7.17744	9.28072e-07	1.84611e-06	5.38618	11	up	5.73374
WG18630	TvsR	complete	1.29752	0.911597	1.68343	20.1973	7.02358	9.30289e-07	1.84719e-06	5.29828	12	up	5.73349
WG18573	MvsR	MAR	1.55398	1.14234	1.96563	19.6833	7.9456	3.21117e-07	1.88656e-06	6.85097	10	up	5.72433
WG14201	TvsR	MNAR	2.67334	1.9894	3.35728	19.4736	8.40932	9.60205e-07	1.90317e-06	6.01245	7	up	5.72052
WG18337	TvsR	MAR	1.29729	0.9173	1.67729	19.6628	7.15718	9.6516e-07	1.90956e-06	5.346	11	up	5.71907
WG27917	TvsR	complete	1.16523	0.817537	1.51292	20.5419	7.001	9.73944e-07	1.9235e-06	5.25135	12	up	5.71591
WG31037	TvsR	complete	1.19385	0.837546	1.55016	19.7651	6.99954	9.76831e-07	1.92575e-06	5.24832	12	up	5.7154
WG05128	TvsM	MAR	1.73524	1.38893	2.08154	20.0184	10.8642	9.50979e-08	1.93901e-06	8.27161	10	up	5.71242
WG22160	TvsR	MAR	2.02969	1.43354	2.62584	20.5208	7.13766	1.00235e-06	1.97254e-06	5.30724	11	up	5.70498
WG12248	TvsM	complete	-1.90737	-2.39494	-1.41981	23.3497	-8.17236	9.87912e-08	1.98849e-06	7.69281	12	down	5.70148
WG01983	MvsR	MAR	2.40954	1.76857	3.0505	20.1196	7.91225	3.40473e-07	1.98947e-06	6.79191	10	up	5.70126
WG14208	TvsR	MNAR	1.95444	1.43323	2.47565	19.6513	8.01388	1.03377e-06	2.02594e-06	5.87902	7	up	5.69337
WG15537	TvsR	MNAR	2.24327	1.64497	2.84156	20.4418	8.01309	1.03499e-06	2.02594e-06	5.87784	7	up	5.69337
WG21286	TvsR	complete	1.03982	0.728158	1.35149	19.4296	6.96969	1.03799e-06	2.02822e-06	5.18618	12	up	5.69288
WG25417	TvsR	MNAR	2.70635	2.06983	3.34288	20.1307	9.3036	1.04067e-06	2.02985e-06	6.06661	7	up	5.69254
WG12615	TvsR	MNAR	3.0178	2.23962	3.79597	19.3208	8.34332	1.05126e-06	2.04573e-06	5.92142	7	up	5.68915
WG00897	TvsR	MAR	1.23793	0.897239	1.57862	17.8259	7.72081	1.05252e-06	2.04573e-06	5.45639	10	up	5.68915
WG04875	MvsR	MNAR	2.76634	2.08992	3.44276	20.1149	8.74021	3.58796e-07	2.08526e-06	6.92463	7	up	5.68084
WG30688	TvsR	complete	1.0521	0.735773	1.36842	19.1546	6.94806	1.08479e-06	2.10476e-06	5.14106	12	up	5.6768
WG30972	TvsM	MNAR	-2.38545	-2.91538	-1.85552	19.6968	-9.62028	1.07813e-07	2.14261e-06	8.14622	7	down	5.66906
WG28720	TvsR	complete	1.71968	1.20161	2.23774	18.3908	6.93435	1.11555e-06	2.16065e-06	5.11245	12	up	5.66542
WG13068	MvsR	complete	1.9755	1.42327	2.52773	20.1125	7.47309	3.78761e-07	2.18952e-06	6.52943	12	up	5.65965
WG13254	TvsM	complete	1.59377	1.2384	1.94915	19.118	9.58468	1.13005e-07	2.19035e-06	7.85797	12	up	5.65949
WG19910	TvsR	complete	1.31671	0.918809	1.7146	19.6751	6.91288	1.16558e-06	2.25358e-06	5.06757	12	up	5.64713
WG08110	TvsR	complete	1.08849	0.759452	1.41754	20.0776	6.91059	1.17104e-06	2.26019e-06	5.06278	12	up	5.64585
WG06332	TvsR	MAR	2.58666	1.84978	3.32353	17.9107	7.42134	1.17582e-06	2.26546e-06	5.29871	10	up	5.64484
WG09772	MvsR	MAR	1.94711	1.42306	2.47115	20.349	7.82022	4.00446e-07	2.30257e-06	6.62819	10	up	5.63779
WG23258	TvsR	MAR	1.65769	1.16406	2.15131	19.3248	7.04021	1.21154e-06	2.32212e-06	5.11295	11	up	5.63411
WG25772	TvsM	complete	1.29772	0.995453	1.59998	20.4802	9.12265	1.22501e-07	2.34544e-06	7.70113	12	up	5.62978
WG00143	TvsR	complete	1.02914	0.716836	1.34145	19.8736	6.88392	1.23674e-06	2.36632e-06	5.00694	12	up	5.62593
WG16624	MvsR	complete	1.24952	0.89808	1.60096	19.6204	7.42735	4.14507e-07	2.37081e-06	6.43815	12	up	5.6251
WG17384	MvsR	MAR	1.70158	1.24205	2.16112	21.3908	7.79352	4.1984e-07	2.37874e-06	6.58046	10	up	5.62365
WG26520	MvsR	complete	1.75411	1.26028	2.24793	20.2987	7.42033	4.20295e-07	2.37874e-06	6.42411	12	up	5.62365
WG10284	MvsR	complete	1.75433	1.25994	2.24873	21.0616	7.41277	4.26629e-07	2.4015e-06	6.40897	12	up	5.61952
WG26045	MvsR	complete	1.36656	0.981318	1.75181	19.9234	7.41025	4.2876e-07	2.4015e-06	6.40393	12	up	5.61952
WG30353	TvsR	complete	1.99906	1.39155	2.60657	20.124	6.87408	1.26193e-06	2.41033e-06	4.98632	12	up	5.61792
WG05128	TvsR	MNAR	2.30218	1.7227	2.88166	20.0184	8.61386	1.26839e-06	2.41849e-06	5.79772	7	up	5.61646
WG26185	TvsM	complete	1.41863	1.06618	1.77108	20.8075	8.47167	1.30011e-07	2.45845e-06	7.51456	12	up	5.60934
WG19336	TvsM	complete	-2.24288	-2.82705	-1.6587	22.1347	-8.02053	1.31535e-07	2.45845e-06	7.40011	12	down	5.60934
WG21655	TvsR	MAR	-1.61679	-2.09173	-1.14184	18.502	-7.16488	1.31362e-06	2.4961e-06	5.13163	10	down	5.60274
WG10945	MvsR	complete	1.18977	0.853035	1.52651	20.6834	7.38098	4.54332e-07	2.51875e-06	6.34529	12	up	5.59882
WG08150	MvsR	complete	1.33739	0.958871	1.71591	19.7074	7.38095	4.54353e-07	2.51875e-06	6.34525	12	up	5.59882
WG26015	TvsR	complete	1.73848	1.20793	2.26902	21.7072	6.84523	1.33886e-06	2.53534e-06	4.92578	12	up	5.59596
WG23915	TvsR	MAR	1.25727	0.887181	1.62737	19.3531	7.15021	1.3499e-06	2.55186e-06	5.05024	11	up	5.59314
WG24896	TvsR	complete	-1.26988	-1.65772	-0.882031	20.716	-6.83982	1.35382e-06	2.55489e-06	4.91442	12	down	5.59263
WG25992	MvsR	complete	1.20092	0.860572	1.54128	20.0268	7.37103	4.63373e-07	2.55564e-06	6.32535	12	up	5.5925
WG30866	MvsR	complete	1.74822	1.25226	2.24417	21.1953	7.3637	4.70162e-07	2.57992e-06	6.31063	12	up	5.58839
WG24203	TvsR	MAR	2.17587	1.52208	2.82966	19.1432	6.97707	1.37077e-06	2.58247e-06	4.9864	11	up	5.58796
WG05540	MvsR	MAR	1.42123	1.03404	1.80843	19.5132	7.72573	4.73586e-07	2.58559e-06	6.45887	10	up	5.58744
WG26469	TvsR	complete	1.92268	1.3339	2.51145	21.0826	6.82181	1.40486e-06	2.64219e-06	4.87657	12	up	5.57804
WG09993	TvsR	complete	1.10616	0.767035	1.44528	20.1381	6.81401	1.42759e-06	2.68037e-06	4.86016	12	up	5.57181
WG25278	TvsR	MAR	1.36856	0.972449	1.76467	19.4294	7.30434	1.44299e-06	2.70027e-06	5.08792	10	up	5.56859
WG23306	TvsR	complete	1.56905	1.08765	2.05046	20.7165	6.80877	1.44308e-06	2.70027e-06	4.84912	12	up	5.56859
WG03106	TvsR	complete	1.74399	1.20881	2.27918	20.1862	6.80743	1.44706e-06	2.70315e-06	4.8463	12	up	5.56813
WG12138	MvsR	complete	-1.14362	-1.46975	-0.817497	20.2848	-7.32549	5.0723e-07	2.74158e-06	6.23382	12	down	5.562
WG16289	TvsM	complete	1.6137	1.24596	1.98143	19.5403	9.37832	1.48813e-07	2.74866e-06	7.57332	12	up	5.56088
WG28873	MvsR	MAR	1.32249	0.958663	1.68632	20.2001	7.65063	5.41591e-07	2.88271e-06	6.3234	10	up	5.5402
WG04088	MvsR	complete	1.22475	0.873808	1.5757	20.8642	7.2904	5.43927e-07	2.88271e-06	6.16312	12	up	5.5402
WG27943	MvsR	complete	1.0612	0.757115	1.36528	19.7476	7.29033	5.44008e-07	2.88271e-06	6.16297	12	up	5.5402
WG22133	MvsR	complete	1.25009	0.891528	1.60865	20.3482	7.28311	5.5189e-07	2.91021e-06	6.14841	12	up	5.53608
WG24167	TvsR	MAR	1.48104	1.03095	1.93112	21.0036	6.89848	1.59973e-06	2.98328e-06	4.82814	11	up	5.52531
WG00533	TvsM	MAR	1.74164	1.35743	2.12585	19.4399	9.75243	1.68369e-07	3.03839e-06	7.55807	11	up	5.51736
WG12870	TvsR	complete	3.26566	2.25393	4.2774	21.3686	6.74289	1.6531e-06	3.0776e-06	4.71018	12	up	5.51179
WG29357	TvsR	complete	1.04862	0.72363	1.37362	21.0708	6.74038	1.6617e-06	3.08841e-06	4.70487	12	up	5.51026
WG00472	MvsR	MAR	-2.47847	-3.06125	-1.89569	20.0088	-9.22094	6.01462e-07	3.15621e-06	6.51264	10	down	5.50083
WG02259	MvsR	complete	1.89302	1.34571	2.44034	18.406	7.22539	6.19367e-07	3.23393e-06	6.03166	12	up	5.49027
WG19041	MvsR	complete	1.31217	0.932672	1.69167	20.6194	7.22307	6.22254e-07	3.23393e-06	6.02695	12	up	5.49027
WG17501	MvsR	complete	1.3537	0.961467	1.74594	20.5261	7.20971	6.39131e-07	3.29001e-06	5.99986	12	up	5.4828
WG12549	TvsR	complete	1.29026	0.888232	1.6923	20.9521	6.70439	1.7902e-06	3.31449e-06	4.62872	12	up	5.47958
WG22530	TvsM	complete	1.30879	1.00521	1.61236	20.6158	9.21375	1.8594e-07	3.31734e-06	7.3429	12	up	5.47921
WG20659	MvsR	complete	1.40236	0.995606	1.80911	19.9939	7.20231	6.48684e-07	3.32335e-06	5.98485	12	up	5.47842
WG19336	TvsR	complete	-1.87396	-2.45814	-1.28978	22.1347	-6.70129	1.80176e-06	3.32633e-06	4.62214	12	down	5.47803
WG19419	TvsR	MAR	1.58591	1.09845	2.07336	19.7863	6.82065	1.86569e-06	3.43288e-06	4.67059	11	up	5.46434
WG25161	TvsR	complete	-1.53838	-2.01946	-1.05731	20.2535	-6.68027	1.88202e-06	3.45716e-06	4.57758	12	down	5.46128
WG27156	TvsM	complete	1.41365	1.08394	1.74335	20.3512	9.16324	1.99211e-07	3.45967e-06	7.27156	12	up	5.46097
WG26019	TvsM	complete	1.06203	0.777708	1.34636	20.5421	7.80306	1.99263e-07	3.45967e-06	6.97547	12	up	5.46097
WG09247	TvsM	MAR	-1.45156	-1.83226	-1.07085	19.0805	-7.99326	2.00528e-07	3.45967e-06	7.05345	11	down	5.46097
WG01926	MvsR	MAR	2.30016	1.65669	2.94364	20.9278	7.52363	6.80687e-07	3.47086e-06	6.09257	10	up	5.45956
WG08200	TvsM	MAR	1.47665	1.08861	1.8647	22.4434	7.97763	2.06332e-07	3.5211e-06	7.02426	11	up	5.45332
WG19629	TvsR	complete	1.77484	1.21892	2.33076	20.359	6.66942	1.9249e-06	3.53005e-06	4.55455	12	up	5.45222
WG02117	TvsR	MAR	1.27234	0.87983	1.66485	20.5935	6.79566	1.96048e-06	3.58934e-06	4.61983	11	up	5.44499
WG25088	TvsM	complete	-1.22961	-1.56043	-0.898787	19.4268	-7.76453	2.14619e-07	3.62314e-06	6.89958	12	down	5.44091
WG01349	TvsR	complete	1.01388	0.695485	1.33227	19.7285	6.6522	1.99505e-06	3.64658e-06	4.51797	12	up	5.43811
WG07149	MvsR	complete	1.64527	1.16427	2.12627	18.3399	7.1455	7.27108e-07	3.69016e-06	5.86933	12	up	5.43296
WG32221	TvsM	complete	1.14535	0.84293	1.44778	19.7701	7.93969	2.2115e-07	3.69368e-06	6.91653	12	up	5.43254
WG26886	MvsR	complete	1.3364	0.945044	1.72776	20.3132	7.13356	7.44811e-07	3.76234e-06	5.84498	12	up	5.42454
WG07448	TvsR	MAR	1.60448	1.10757	2.10139	20.2453	6.76914	2.06652e-06	3.76475e-06	4.56588	11	up	5.42426
WG32296	TvsR	complete	1.29173	0.884887	1.69857	19.6415	6.63267	2.07777e-06	3.779e-06	4.47645	12	up	5.42262
WG13534	MvsR	complete	1.03246	0.72918	1.33573	19.5874	7.1117	7.78367e-07	3.91356e-06	5.80038	12	up	5.40743
WG28013	TvsR	complete	1.84552	1.26221	2.42882	20.5643	6.60941	2.18093e-06	3.9592e-06	4.42693	12	up	5.40239
WG03261	TvsR	MAR	1.11158	0.765902	1.45726	20.3246	6.74135	2.18402e-06	3.9592e-06	4.50925	11	up	5.40239
WG31506	TvsR	MNAR	2.04205	1.46181	2.62228	20.6464	7.52136	2.1976e-06	3.97729e-06	5.11964	7	up	5.40041
WG03114	TvsM	complete	1.14727	0.836134	1.45841	20.9576	7.70291	2.41778e-07	3.9957e-06	6.77778	12	up	5.39841
WG30561	TvsR	complete	1.40585	0.960917	1.85078	19.4897	6.60063	2.22123e-06	4.01348e-06	4.40821	12	up	5.39648
WG05348	TvsM	complete	1.29355	0.986651	1.60046	20.5869	9.00779	2.46727e-07	4.03501e-06	7.05017	12	up	5.39416
WG31775	TvsM	complete	1.63255	1.24481	2.02029	19.354	8.99837	2.49968e-07	4.04588e-06	7.03666	12	up	5.39299
WG07001	TvsM	complete	1.58194	1.1922	1.97168	20.4533	8.62474	2.55965e-07	4.10066e-06	6.94057	12	up	5.38715
WG29315	TvsR	complete	1.76612	1.20594	2.32631	22.3284	6.58615	2.28936e-06	4.12982e-06	4.37734	12	up	5.38407
WG30974	TvsM	MNAR	-2.25703	-2.79553	-1.71853	19.9718	-8.95747	2.64568e-07	4.19567e-06	7.26648	7	down	5.3772
WG12961	MvsR	complete	1.43735	1.01199	1.86272	20.2287	7.05906	8.65736e-07	4.33269e-06	5.69272	12	up	5.36324
WG15293	TvsR	complete	1.93882	1.32144	2.5562	20.5724	6.56031	2.41636e-06	4.34473e-06	4.32217	12	up	5.36204
WG12532	TvsR	complete	1.23961	0.844436	1.63478	19.8993	6.55301	2.45358e-06	4.40447e-06	4.30656	12	up	5.35611
WG32726	TvsM	complete	1.56004	1.18586	1.93422	19.5659	8.91019	2.82574e-07	4.43642e-06	6.90974	12	up	5.35297
WG31286	MvsR	complete	1.54244	1.08506	1.99982	20.5412	7.0448	8.91101e-07	4.43908e-06	5.66349	12	up	5.35271
WG08958	TvsM	complete	1.4167	1.07641	1.757	19.5157	8.89737	2.8768e-07	4.44951e-06	6.8912	12	up	5.35169
WG13084	TvsM	complete	1.28868	0.97902	1.59834	19.2928	8.8939	2.89076e-07	4.44951e-06	6.88619	12	up	5.35169
WG04679	MvsR	complete	1.1871	0.834416	1.53979	20.6317	7.03136	9.15716e-07	4.52004e-06	5.63591	12	up	5.34486
WG07382	MvsR	complete	1.27651	0.897093	1.65593	20.46	7.02827	9.2148e-07	4.52782e-06	5.62956	12	up	5.34411
WG07852	MvsR	complete	-1.77753	-2.30649	-1.24856	22.2646	-7.01991	9.37249e-07	4.58446e-06	5.61239	12	down	5.33871
WG03872	TvsM	complete	1.3049	0.969432	1.64036	19.3933	8.22365	3.0312e-07	4.62038e-06	6.70237	12	up	5.33532
WG10566	TvsR	complete	1.00533	0.68343	1.32722	20.4036	6.52428	2.60569e-06	4.66994e-06	4.24511	12	up	5.33069
WG03201	TvsR	complete	4.8567	3.30121	6.4122	21.9889	6.52251	2.61538e-06	4.67971e-06	4.24131	12	up	5.32978
WG03893	MvsR	complete	2.25003	1.57909	2.92098	22.6089	7.00559	9.64902e-07	4.69847e-06	5.58296	12	up	5.32804
WG02915	TvsM	MAR	1.43595	1.10221	1.76969	21.0246	9.25674	3.13169e-07	4.72764e-06	6.91578	11	up	5.32536
WG05348	MvsR	MNAR	2.16329	1.58913	2.73745	20.5869	8.05221	9.76083e-07	4.7316e-06	5.97999	7	up	5.32499
WG10096	TvsR	MAR	1.1705	0.807502	1.5335	20.5812	6.78683	2.67633e-06	4.76559e-06	4.40154	10	up	5.32188
WG05449	MvsR	complete	1.31115	0.919345	1.70296	21.7945	6.99072	9.94514e-07	4.79942e-06	5.55237	12	up	5.31881
WG15859	MvsR	complete	1.16631	0.817553	1.51508	20.516	6.986	1.00412e-06	4.80288e-06	5.54265	12	up	5.3185
WG16914	MvsR	complete	1.02264	0.716447	1.32882	19.9156	6.97707	1.02251e-06	4.83786e-06	5.52427	12	up	5.31535
WG00447	MvsR	complete	1.01899	0.713883	1.32411	19.6809	6.97677	1.02315e-06	4.83786e-06	5.52365	12	up	5.31535
WG13462	MvsR	complete	1.9027	1.33292	2.47248	20.3677	6.97595	1.02486e-06	4.83786e-06	5.52195	12	up	5.31535
WG04119	TvsM	complete	1.29955	0.984354	1.61474	20.0027	8.81151	3.2447e-07	4.8516e-06	6.7666	12	up	5.31411
WG17125	TvsR	complete	1.33501	0.906082	1.76393	21.3283	6.50194	2.73068e-06	4.85454e-06	4.19724	12	up	5.31385
WG08460	TvsM	complete	1.60087	1.21222	1.98953	18.9877	8.80303	3.28364e-07	4.86351e-06	6.75425	12	up	5.31305
WG23844	MvsR	MNAR	2.91295	2.1357	3.69021	19.6738	8.00948	1.04063e-06	4.89094e-06	5.91917	7	up	5.31061
WG20318	TvsM	MAR	1.99769	1.5518	2.44357	18.4054	9.71407	3.37068e-07	4.94576e-06	6.96692	10	up	5.30577
WG12901	MvsR	complete	-1.34368	-1.74728	-0.940075	21.1099	-6.95479	1.07e-06	5.00722e-06	5.47833	12	down	5.3004
WG32599	MvsR	complete	1.00143	0.700102	1.30276	22.9728	6.94262	1.09689e-06	5.11092e-06	5.45322	12	up	5.2915
WG25992	TvsM	complete	1.2237	0.883349	1.56405	20.0268	7.51083	3.51672e-07	5.11227e-06	6.39485	12	up	5.29139
WG09652	TvsM	complete	1.3472	1.01789	1.67652	20.2714	8.74298	3.57394e-07	5.14778e-06	6.66653	12	up	5.28838
WG06393	MvsR	MAR	1.37218	0.965942	1.77841	20.9335	7.08133	1.11823e-06	5.16584e-06	5.50691	11	up	5.28686
WG22872	MvsR	complete	1.14091	0.796966	1.48486	20.9917	6.92952	1.12661e-06	5.18243e-06	5.42616	12	up	5.28547
WG00894	TvsM	complete	1.51266	1.12955	1.89578	20.1878	8.38964	3.66173e-07	5.22629e-06	6.57087	12	up	5.28181
WG03280	TvsR	MAR	1.92394	1.32281	2.52506	20.7995	6.73641	2.94713e-06	5.23091e-06	4.30271	10	up	5.28142
WG03100	TvsM	complete	-1.34833	-1.72518	-0.971483	20.6181	-7.4743	3.77861e-07	5.30912e-06	6.32145	12	down	5.27498
WG28688	TvsM	complete	1.32891	1.00254	1.65528	20.6868	8.70203	3.7874e-07	5.30912e-06	6.60646	12	up	5.27498
WG12498	MvsR	MAR	-1.33676	-1.67065	-1.00288	18.934	-8.68073	1.16613e-06	5.31893e-06	5.84123	10	down	5.27418
WG02301	TvsR	complete	1.07527	0.727293	1.42325	20.87	6.45514	3.01299e-06	5.33922e-06	4.09676	12	up	5.27252
WG12143	TvsR	complete	1.40604	0.950431	1.86165	19.5664	6.44684	3.06611e-06	5.42466e-06	4.07891	12	up	5.26563
WG08338	TvsM	complete	1.38276	0.994936	1.77058	19.4728	7.44825	3.9776e-07	5.46522e-06	6.26901	12	up	5.26239
WG17627	TvsR	MAR	1.20987	0.83027	1.58946	19.2644	6.70837	3.10984e-06	5.49323e-06	4.24762	10	up	5.26017
WG10187	TvsR	complete	-1.46112	-1.93591	-0.986327	20.0517	-6.42873	3.1854e-06	5.61771e-06	4.03993	12	down	5.25044
WG19392	TvsM	complete	1.17618	0.844959	1.50741	20.4305	7.41811	4.22144e-07	5.66467e-06	6.20822	12	up	5.24683
WG04744	TvsM	complete	1.29588	0.930353	1.66141	19.9926	7.40604	4.32338e-07	5.75229e-06	6.18384	12	up	5.24016
WG13560	TvsR	complete	1.00483	0.677521	1.33213	22.035	6.41328	3.29092e-06	5.79454e-06	4.00666	12	up	5.23698
WG11127	MvsR	complete	1.60742	1.11804	2.0968	20.3289	6.86157	1.2947e-06	5.85222e-06	5.28543	12	up	5.23268
WG25357	TvsR	complete	1.06061	0.714825	1.40639	20.6057	6.40758	3.33073e-06	5.8553e-06	3.99438	12	up	5.23245
WG27943	TvsM	complete	1.07603	0.77195	1.38011	19.7476	7.39224	4.44308e-07	5.86188e-06	6.15594	12	up	5.23196
WG14148	MvsR	MAR	1.33244	0.933199	1.73168	20.5569	6.99671	1.31905e-06	5.91655e-06	5.33979	11	up	5.22793
WG18429	TvsR	MNAR	3.14755	2.24756	4.04753	17.9102	7.5242	3.37825e-06	5.9294e-06	4.74464	7	up	5.22699
WG31960	TvsR	complete	1.6476	1.1093	2.18591	20.6318	6.39385	3.42875e-06	5.98945e-06	3.96477	12	up	5.22261
WG19793	TvsM	complete	1.15502	0.866555	1.44349	20.1918	8.55714	4.65742e-07	6.02762e-06	6.39231	12	up	5.21985
WG22084	TvsM	complete	1.13404	0.812403	1.45567	21.0349	7.3656	4.68388e-07	6.02762e-06	6.10201	12	up	5.21985
WG09876	TvsM	complete	1.22222	0.87536	1.56907	18.4457	7.36104	4.72645e-07	6.03295e-06	6.09277	12	up	5.21947
WG10465	TvsM	complete	1.3154	0.986263	1.64454	19.4966	8.54114	4.7657e-07	6.03399e-06	6.3685	12	up	5.2194
WG01568	TvsR	MAR	1.14273	0.774834	1.51063	19.8871	6.51174	3.46285e-06	6.03948e-06	4.03746	11	up	5.219
WG10532	TvsM	complete	1.18231	0.886202	1.47842	20.8532	8.53326	4.82004e-07	6.05397e-06	6.35676	12	up	5.21796
WG10055	TvsR	complete	1.03513	0.696402	1.37385	19.5566	6.38394	3.50136e-06	6.08741e-06	3.94337	12	up	5.21557
WG29903	MvsR	complete	2.13755	1.4835	2.7916	20.2184	6.82724	1.38927e-06	6.18025e-06	5.2141	12	up	5.20899
WG32314	MvsR	complete	-1.37639	-1.7977	-0.955079	21.0105	-6.82463	1.39674e-06	6.18803e-06	5.20867	12	down	5.20845
WG10681	MvsR	MAR	1.27954	0.901759	1.65732	19.2307	7.12877	1.40482e-06	6.19842e-06	5.36053	10	up	5.20772
WG12047	TvsM	MNAR	4.08019	3.30734	4.85304	18.6609	11.838	5.05257e-07	6.29566e-06	6.8732	7	up	5.20096
WG31004	TvsM	complete	1.02074	0.734892	1.30658	20.8496	7.48628	5.14187e-07	6.35648e-06	6.05224	12	up	5.19678
WG21655	TvsM	MAR	-1.73114	-2.20608	-1.25619	18.502	-7.67163	5.21609e-07	6.39786e-06	6.17389	10	down	5.19397
WG31388	TvsR	MNAR	2.91715	2.05049	3.78381	20.3605	7.19356	3.69325e-06	6.41093e-06	4.59578	7	up	5.19308
WG28849	TvsM	complete	1.15593	0.864307	1.44756	20.609	8.47109	5.27205e-07	6.41637e-06	6.26391	12	up	5.19271
WG26447	MvsR	complete	1.12566	0.779866	1.47146	20.6633	6.8003	1.46845e-06	6.42672e-06	5.15801	12	up	5.19201
WG00693	TvsM	MNAR	3.57953	2.89659	4.26247	18.8963	11.7527	5.39203e-07	6.46445e-06	6.81263	7	up	5.18947
WG27567	TvsM	complete	1.27067	0.949499	1.59184	18.2853	8.4553	5.39391e-07	6.46445e-06	6.24024	12	up	5.18947
WG19721	MvsR	MAR	1.84074	1.29479	2.38669	20.166	7.09641	1.49217e-06	6.48847e-06	5.29957	10	up	5.18786
WG15334	MvsR	MAR	1.10161	0.774837	1.42838	19.7069	7.09555	1.49457e-06	6.48847e-06	5.29794	10	up	5.18786
WG23317	MvsR	complete	-1.11833	-1.42639	-0.810265	22.5702	-7.75823	1.52326e-06	6.58658e-06	5.36857	12	down	5.18134
WG26455	TvsM	complete	1.3614	1.00526	1.71754	20.1744	8.12255	5.54482e-07	6.59498e-06	6.1424	12	up	5.18079
WG30114	TvsR	complete	1.24036	0.831841	1.64887	20.9287	6.34278	3.82009e-06	6.62068e-06	3.85443	12	up	5.1791
WG11856	TvsM	complete	1.03302	0.77089	1.29515	19.8752	8.42221	5.6589e-07	6.68006e-06	6.19056	12	up	5.17522
WG04013	MvsR	complete	1.11017	0.76771	1.45263	19.8417	6.77205	1.55651e-06	6.70352e-06	5.09909	12	up	5.1737
WG25624	MvsR	MAR	1.74469	1.21504	2.27434	19.6518	6.90572	1.57707e-06	6.76514e-06	5.159	11	up	5.16972
WG26056	MvsR	MAR	1.54125	1.07312	2.00938	21.5592	6.90218	1.58811e-06	6.78554e-06	5.15195	11	up	5.16842
WG19319	TvsM	complete	1.05664	0.752488	1.36079	20.3054	7.25735	5.81014e-07	6.8074e-06	5.8819	12	up	5.16702
WG20629	TvsM	complete	1.26898	0.945805	1.59216	20.6819	8.39169	5.91546e-07	6.8376e-06	6.14463	12	up	5.1651
WG14482	TvsM	complete	1.03413	0.736064	1.3322	20.2852	7.24772	5.92302e-07	6.8376e-06	5.86224	12	up	5.1651
WG12774	TvsR	complete	1.52845	1.0235	2.03341	21.3116	6.32325	3.98165e-06	6.88988e-06	3.81215	12	up	5.16179
WG06652	TvsM	complete	1.29675	0.965861	1.62764	19.9407	8.37543	6.05721e-07	6.91388e-06	6.1201	12	up	5.16028
WG06455	TvsM	complete	1.20897	0.900397	1.51755	20.3457	8.37317	6.07716e-07	6.91388e-06	6.11669	12	up	5.16028
WG10691	MvsR	complete	1.13718	0.784981	1.48938	20.4685	6.74499	1.64595e-06	7.00502e-06	5.04256	12	up	5.15459
WG14394	TvsR	complete	1.64115	1.09804	2.18427	20.6222	6.31247	4.07387e-06	7.03843e-06	3.78878	12	up	5.15252
WG17222	TvsM	complete	1.24348	0.92514	1.56183	20.9121	8.34789	6.30543e-07	7.07109e-06	6.0785	12	up	5.15051
WG17375	MvsR	MNAR	2.4149	1.74404	3.08576	20.9472	7.69312	1.68351e-06	7.1089e-06	5.46081	7	up	5.1482
WG22877	TvsM	complete	1.08477	0.770315	1.39923	19.7852	7.20643	6.43345e-07	7.16349e-06	5.77781	12	up	5.14488
WG22802	TvsM	MAR	1.56417	1.1765	1.95184	18.878	8.68051	6.65178e-07	7.35443e-06	6.13499	11	up	5.13345
WG17647	TvsM	complete	1.32695	0.985475	1.66843	19.803	8.30479	6.7157e-07	7.37318e-06	6.01319	12	up	5.13235
WG31303	MvsR	MAR	1.05532	0.732135	1.3785	19.9794	6.84569	1.77546e-06	7.42974e-06	5.03911	11	up	5.12903
WG03389	MvsR	complete	1.00659	0.693072	1.3201	20.3586	6.70712	1.78011e-06	7.42974e-06	4.96329	12	up	5.12903
WG00153	TvsM	complete	1.02184	0.724007	1.31968	19.9224	7.16716	6.96105e-07	7.53713e-06	5.69731	12	up	5.12279
WG18438	TvsM	complete	1.12858	0.799044	1.45811	20.3277	7.1544	7.14197e-07	7.68006e-06	5.67111	12	up	5.11464
WG02662	MvsR	complete	1.34815	0.925795	1.77051	21.7107	6.66809	1.93022e-06	7.99451e-06	4.88139	12	up	5.09721
WG20119	TvsM	complete	1.10878	0.796161	1.4214	20.5764	7.46502	7.56971e-07	8.08466e-06	5.70544	12	up	5.09234
WG30688	TvsM	complete	1.07805	0.761724	1.39438	19.1546	7.11944	7.66312e-07	8.12912e-06	5.59919	12	up	5.08996
WG27021	TvsM	complete	1.44022	1.05286	1.82759	20.082	7.90013	7.88659e-07	8.30298e-06	5.77857	12	up	5.08077
WG12693	TvsM	complete	1.24604	0.893503	1.59857	20.7782	7.43925	7.93278e-07	8.30298e-06	5.65735	12	up	5.08077
WG03042	TvsM	complete	-1.26355	-1.63572	-0.891379	20.5646	-7.0924	8.09295e-07	8.41452e-06	5.54346	12	down	5.07497
WG07167	TvsM	MAR	1.42603	1.06584	1.78623	20.5035	8.51768	8.28381e-07	8.49453e-06	5.95239	10	up	5.07086
WG08741	TvsM	complete	1.46028	1.05492	1.86564	20.579	7.616	8.39762e-07	8.50598e-06	5.65318	12	up	5.07028
WG28372	TvsR	MNAR	2.12588	1.47757	2.77419	19.1733	7.00796	4.9865e-06	8.58829e-06	4.2925	7	up	5.06609
WG02325	MvsR	MAR	2.13962	1.48799	2.79125	19.4827	6.9109	2.11432e-06	8.69043e-06	4.94733	10	up	5.06096
WG27111	MvsR	complete	-1.88199	-2.47583	-1.28815	21.6597	-6.6205	2.13108e-06	8.69321e-06	4.78125	12	down	5.06082
WG12764	TvsM	complete	1.02865	0.749911	1.3074	19.8733	7.84139	8.66458e-07	8.7187e-06	5.68142	12	up	5.05955
WG27772	TvsM	complete	1.48818	1.04756	1.92881	20.3094	7.05557	8.7187e-07	8.7187e-06	5.46742	12	up	5.05955
WG24540	TvsM	complete	1.18907	0.876055	1.50208	19.1572	8.11859	8.84063e-07	8.78468e-06	5.72837	12	up	5.05627
WG06265	TvsM	complete	1.37746	0.976065	1.77886	19.4106	7.19424	8.98427e-07	8.79047e-06	5.48087	12	up	5.05599
WG31388	TvsM	complete	1.75696	1.29371	2.22021	20.3605	8.10551	9.01443e-07	8.79047e-06	5.7082	12	up	5.05599
WG22859	MvsR	complete	-1.05707	-1.35724	-0.756895	19.991	-7.52599	2.18174e-06	8.83318e-06	5.00086	12	down	5.05388
WG20864	TvsM	complete	1.08018	0.759355	1.401	20.6944	7.0335	9.11756e-07	8.83616e-06	5.42175	12	up	5.05374
WG03957	TvsM	complete	1.42396	1.04745	1.80046	19.4539	8.08281	9.32467e-07	8.98143e-06	5.67314	12	up	5.04665
WG27626	TvsM	complete	1.5778	1.15959	1.99601	19.7228	8.06285	9.6068e-07	9.08595e-06	5.64226	12	up	5.04163
WG06107	MvsR	MAR	1.86006	1.27992	2.44021	19.6001	6.7216	2.27172e-06	9.16315e-06	4.78973	11	up	5.03796
WG25448	TvsR	complete	1.11936	0.741091	1.49763	20.7653	6.18175	5.3832e-06	9.24269e-06	3.50445	12	up	5.0342
WG26909	MvsR	complete	1.29421	0.883281	1.70515	20.692	6.57926	2.32255e-06	9.33338e-06	4.69422	12	up	5.02996
WG00088	TvsM	MAR	1.44063	1.07033	1.81092	18.4357	8.37001	1.01338e-06	9.47028e-06	5.69824	11	up	5.02364
WG03823	MvsR	MAR	1.16131	0.797806	1.52482	20.6462	6.69756	2.3834e-06	9.50722e-06	4.74117	11	up	5.02195
WG17748	TvsR	complete	1.58734	1.0493	2.12539	20.1906	6.163	5.6037e-06	9.60634e-06	3.46351	12	up	5.01744
WG12980	TvsM	complete	1.16125	0.850727	1.47178	19.8675	7.99216	1.06805e-06	9.80611e-06	5.53247	12	up	5.0085
WG32618	TvsR	complete	1.1224	0.740757	1.50404	19.036	6.14374	5.83997e-06	9.94958e-06	3.4214	12	up	5.0022
WG04242	TvsM	complete	1.43731	1.05168	1.82293	20.3808	7.96561	1.11158e-06	1.01464e-05	5.49108	12	up	4.99369
WG22684	TvsM	complete	1.77495	1.2982	2.25171	20.0563	7.95657	1.12683e-06	1.02261e-05	5.47697	12	up	4.99029
WG08879	MvsR	complete	2.13553	1.4513	2.81976	20.0945	6.51998	2.62928e-06	1.04494e-05	4.56877	12	up	4.98091
WG28337	TvsM	complete	1.19511	0.833749	1.55648	20.462	6.90885	1.17521e-06	1.04834e-05	5.16265	12	up	4.9795
WG03221	TvsR	MNAR	3.74154	2.57816	4.90491	21.9732	6.87328	6.2181e-06	1.05775e-05	4.06939	7	up	4.97562
WG20001	MvsR	complete	-2.16895	-2.79761	-1.54028	20.8345	-7.37334	2.77334e-06	1.09208e-05	4.7552	12	down	4.96174
WG21327	MvsR	MAR	-1.47182	-1.87032	-1.07332	22.2339	-8.00801	2.77819e-06	1.09208e-05	4.95717	10	down	4.96174
WG27381	TvsR	MAR	1.43607	0.950767	1.92137	19.7746	6.20359	6.49955e-06	1.10392e-05	3.39369	11	up	4.95706
WG13462	TvsR	complete	1.66137	1.09159	2.23115	20.3677	6.09114	6.53858e-06	1.10885e-05	3.3062	12	up	4.95513
WG06385	MvsR	complete	1.07906	0.731365	1.42676	20.6336	6.48313	2.84071e-06	1.11261e-05	4.49056	12	up	4.95366
WG00939	TvsM	complete	1.71973	1.2531	2.18635	18.7641	7.87639	1.27211e-06	1.12203e-05	5.35131	12	up	4.95
WG21869	MvsR	complete	1.04914	0.710208	1.38807	21.6079	6.46641	2.94238e-06	1.13854e-05	4.455	12	up	4.94365
WG19973	MvsR	complete	-1.84092	-2.37779	-1.30404	20.1014	-7.32818	2.97906e-06	1.14604e-05	4.68192	12	down	4.9408
WG01082	TvsM	complete	1.78993	1.3029	2.27697	19.2853	7.85437	1.31537e-06	1.1473e-05	5.31666	12	up	4.94032
WG12112	TvsM	complete	1.42642	1.03761	1.81523	20.4841	7.84047	1.34347e-06	1.16533e-05	5.29476	12	up	4.93355
WG14112	TvsM	complete	1.1573	0.803673	1.51092	20.884	6.83666	1.36263e-06	1.16623e-05	5.01166	12	up	4.93321
WG12626	TvsM	complete	1.41352	1.00606	1.82098	20.8119	7.33416	1.36939e-06	1.16623e-05	5.14982	12	up	4.93321
WG19079	MvsR	complete	-1.91037	-2.46967	-1.35108	19.2236	-7.29978	3.11663e-06	1.19049e-05	4.63569	12	down	4.92428
WG09656	TvsM	complete	1.34109	0.93009	1.75208	20.5045	6.81647	1.42037e-06	1.19892e-05	4.96931	12	up	4.92121
WG30723	TvsR	complete	1.03008	0.67382	1.38634	20.2003	6.0401	7.29882e-06	1.23587e-05	3.19409	12	up	4.90803
WG10828	TvsM	complete	1.53618	1.11292	1.95944	19.5815	7.7566	1.52706e-06	1.26598e-05	5.16203	12	up	4.89757
WG00041	TvsM	complete	1.62893	1.17999	2.07786	20.3439	7.75446	1.53207e-06	1.26598e-05	5.15864	12	up	4.89757
WG02521	MvsR	complete	2.61716	1.76375	3.47058	21.086	6.40637	3.33928e-06	1.27104e-05	4.32705	12	up	4.89584
WG17122	TvsR	MNAR	1.90121	1.29958	2.50284	19.6513	6.75361	7.58111e-06	1.28171e-05	3.86897	7	up	4.89221
WG19079	TvsR	MNAR	-3.30598	-4.35233	-2.25963	19.2236	-6.75238	7.59666e-06	1.28237e-05	3.8669	7	down	4.89199
WG28474	MvsR	complete	-1.36829	-1.78319	-0.953392	20.3147	-7.00751	3.45821e-06	1.30711e-05	4.47089	12	down	4.88369
WG04455	MvsR	complete	1.10994	0.746623	1.47326	20.7384	6.38195	3.51612e-06	1.32436e-05	4.27488	12	up	4.87799
WG22839	MvsR	complete	-1.96841	-2.61303	-1.32378	20.0604	-6.37895	3.5385e-06	1.32816e-05	4.26847	12	down	4.87675
WG12778	TvsR	complete	1.67605	1.09231	2.25978	19.2956	5.99807	7.99263e-06	1.34715e-05	3.10156	12	up	4.87058
WG12597	MvsR	complete	1.35132	0.907779	1.79487	20.1694	6.36447	3.64856e-06	1.36474e-05	4.23751	12	up	4.86495
WG28598	TvsM	complete	1.78474	1.28883	2.28065	18.5587	7.69147	1.68781e-06	1.36686e-05	5.05832	12	up	4.86428
WG28224	TvsM	MAR	1.30042	0.903644	1.6972	19.4017	6.87096	1.68898e-06	1.36686e-05	4.87442	11	up	4.86428
WG10705	TvsM	complete	1.13182	0.807538	1.4561	19.9511	7.41621	1.73487e-06	1.3968e-05	4.9645	12	up	4.85487
WG15237	TvsR	complete	1.28223	0.833628	1.73084	21.0803	5.97096	8.47591e-06	1.42643e-05	3.04175	12	up	4.84575
WG05778	TvsM	complete	1.28806	0.928055	1.64807	20.1008	7.64645	1.80926e-06	1.43318e-05	4.98633	12	up	4.8437
WG12927	TvsM	MAR	1.84452	1.34556	2.34349	16.8783	7.95314	1.81479e-06	1.43318e-05	5.09343	11	up	4.8437
WG27569	TvsM	complete	1.58396	1.10711	2.06081	20.1219	6.99139	1.81657e-06	1.43318e-05	4.80716	12	up	4.8437
WG16775	TvsR	MAR	1.32496	0.874254	1.77566	20.1438	6.18745	8.60642e-06	1.44619e-05	3.20503	10	up	4.83977
WG21566	MvsR	MAR	1.0987	0.741617	1.45577	21.3644	6.45051	3.92042e-06	1.46137e-05	4.23775	11	up	4.83524
WG09353	TvsM	complete	1.42158	1.02251	1.82064	20.44	7.61311	1.90512e-06	1.4934e-05	4.93283	12	up	4.82582
WG06322	TvsM	MNAR	3.0534	2.38189	3.72492	18.6505	10.1959	1.91194e-06	1.4934e-05	5.61151	7	up	4.82582
WG29628	TvsM	complete	1.41485	1.01738	1.81232	19.6007	7.60747	1.92187e-06	1.49373e-05	4.92376	12	up	4.82573
WG12998	TvsR	complete	1.09202	0.708027	1.47602	20.1818	5.94082	9.04821e-06	1.51582e-05	2.9752	12	up	4.81935
WG19631	TvsR	complete	1.19	0.771389	1.60861	20.7953	5.93853	9.09329e-06	1.52106e-05	2.97014	12	up	4.81785
WG30786	MvsR	MNAR	1.97611	1.3831	2.56912	20.0659	7.12171	4.14618e-06	1.54021e-05	4.5961	7	up	4.81242
WG03546	TvsM	complete	1.09568	0.75692	1.43445	19.872	6.78059	2.02001e-06	1.55461e-05	4.65195	12	up	4.80838
WG15035	TvsR	MAR	1.04278	0.68004	1.40552	20.2253	6.02667	9.38249e-06	1.56706e-05	3.01878	11	up	4.80491
WG29315	MvsR	complete	1.68731	1.12712	2.24749	22.3284	6.29224	4.2528e-06	1.57441e-05	4.0826	12	up	4.80288
WG15524	MvsR	complete	-1.3226	-1.76192	-0.883285	21.6401	-6.28918	4.28055e-06	1.5791e-05	4.07603	12	down	4.80159
WG32055	MvsR	complete	1.03899	0.693794	1.38419	19.9634	6.28763	4.29467e-06	1.5791e-05	4.0727	12	up	4.80159
WG05050	TvsM	complete	1.0007	0.685385	1.31601	20.4195	6.62984	2.09004e-06	1.59617e-05	4.57531	12	up	4.79692
WG19083	TvsM	complete	-1.5178	-1.99642	-1.03917	20.9742	-6.62461	2.11291e-06	1.60254e-05	4.56422	12	down	4.79519
WG25161	MvsR	complete	-1.44372	-1.92479	-0.962641	20.2535	-6.26918	4.46661e-06	1.63122e-05	4.03303	12	down	4.78749
WG07467	TvsM	complete	1.42722	1.02216	1.83229	20.0184	7.53009	2.16784e-06	1.6363e-05	4.79898	12	up	4.78614
WG03546	MvsR	MAR	1.0814	0.726099	1.4367	19.872	6.38075	4.51865e-06	1.64467e-05	4.09413	11	up	4.78392
WG27618	TvsM	complete	1.30789	0.936207	1.67957	19.2243	7.52026	2.20137e-06	1.65366e-05	4.78307	12	up	4.78155
WG28460	TvsM	complete	1.54103	1.10288	1.97918	19.5556	7.51656	2.21412e-06	1.65532e-05	4.77709	12	up	4.78112
WG19588	TvsM	complete	1.13667	0.813122	1.46021	19.4132	7.50814	2.24348e-06	1.66144e-05	4.76344	12	up	4.77951
WG17375	TvsM	complete	1.25766	0.899072	1.61625	20.9472	7.4955	2.28829e-06	1.66465e-05	4.74295	12	up	4.77868
WG01998	TvsM	MAR	1.90034	1.37554	2.42514	22.4687	7.79044	2.29104e-06	1.66465e-05	4.85147	11	up	4.77868
WG03928	TvsM	complete	1.2079	0.836852	1.57895	21.0008	6.85172	2.36532e-06	1.67936e-05	4.53646	12	up	4.77486
WG13809	TvsM	complete	1.02442	0.731407	1.31742	20.058	7.47187	2.37463e-06	1.67936e-05	4.70458	12	up	4.77486
WG16172	TvsR	complete	1.3676	0.888789	1.84641	19.5712	5.98791	1.01737e-05	1.69409e-05	2.89344	12	up	4.77106
WG03516	MvsR	MAR	-1.18808	-1.56576	-0.810397	18.4555	-6.65049	4.68814e-06	1.70063e-05	4.21184	9	down	4.76939
WG11659	TvsM	complete	1.98958	1.36616	2.613	19.8761	6.69052	2.41718e-06	1.70178e-05	4.46843	12	up	4.7691
WG17437	MvsR	MAR	1.3446	0.90858	1.78062	21.4029	6.49061	4.73811e-06	1.71031e-05	4.1317	10	up	4.76693
WG01334	TvsM	complete	-1.595	-2.10336	-1.08665	21.2394	-6.55449	2.44599e-06	1.71438e-05	4.41497	12	down	4.76589
WG00872	TvsR	complete	1.0054	0.648224	1.36257	20.713	5.8803	1.03205e-05	1.71594e-05	2.84123	12	up	4.7655
WG19041	TvsM	complete	1.18928	0.809784	1.56878	20.6194	6.54661	2.48666e-06	1.73513e-05	4.39816	12	up	4.76067
WG17851	TvsR	complete	1.10522	0.711952	1.4985	19.29	5.8708	1.05363e-05	1.74918e-05	2.82016	12	up	4.75717
WG02613	MvsR	complete	1.62535	1.07977	2.17092	20.017	6.22346	4.92402e-06	1.76839e-05	3.9345	12	up	4.75242
WG20212	TvsM	complete	1.05513	0.717653	1.39261	19.6107	6.53134	2.56746e-06	1.77573e-05	4.36557	12	up	4.75062
WG05443	TvsM	complete	1.15007	0.782082	1.51805	20.7265	6.52883	2.58097e-06	1.77725e-05	4.36021	12	up	4.75025
WG16241	TvsM	complete	1.18658	0.844258	1.5289	21.2942	7.40795	2.62579e-06	1.80021e-05	4.60042	12	up	4.74468
WG20212	MvsR	complete	1.002	0.664523	1.33948	19.6107	6.20246	5.1499e-06	1.83731e-05	3.88918	12	up	4.73582
WG03595	TvsM	complete	1.32854	0.923838	1.73323	19.4711	6.94031	2.76098e-06	1.87651e-05	4.42837	12	up	4.72665
WG20030	MvsR	complete	1.12445	0.744614	1.50429	19.7796	6.18421	5.35492e-06	1.90417e-05	3.84973	12	up	4.72029
WG14298	TvsM	complete	1.19701	0.824043	1.56998	21.7291	6.75503	2.84393e-06	1.91736e-05	4.34754	12	up	4.7173
WG00139	TvsM	complete	1.33678	0.928589	1.74497	19.0731	6.92363	2.84551e-06	1.91736e-05	4.39736	12	up	4.7173
WG30790	MvsR	complete	1.32705	0.878334	1.77576	19.78	6.17815	5.42483e-06	1.9227e-05	3.83663	12	up	4.71609
WG00438	MvsR	complete	-1.2211	-1.63429	-0.807909	20.4806	-6.17366	5.47724e-06	1.93493e-05	3.82691	12	down	4.71333
WG05266	TvsM	complete	1.03634	0.701928	1.37075	20.4711	6.47385	2.89666e-06	1.94349e-05	4.2426	12	up	4.71142
WG04581	TvsM	complete	2.02263	1.37981	2.66546	20.2466	6.59637	2.91941e-06	1.95041e-05	4.27548	12	up	4.70987
WG09890	MvsR	complete	1.07539	0.711076	1.43971	19.8957	6.16637	5.56339e-06	1.95261e-05	3.81115	12	up	4.70939
WG30992	TvsM	complete	1.09798	0.743277	1.45269	20.877	6.46648	2.94193e-06	1.95535e-05	4.2268	12	up	4.70878
WG31693	TvsM	complete	1.07612	0.72839	1.42385	20.0283	6.4649	2.95171e-06	1.95535e-05	4.22342	12	up	4.70878
WG11753	TvsM	complete	1.16748	0.789964	1.54499	21.3898	6.46038	2.97994e-06	1.96576e-05	4.21372	12	up	4.70647
WG31748	TvsM	MAR	1.2775	0.928964	1.62603	19.2412	7.94715	3.01279e-06	1.97912e-05	4.69511	10	up	4.70353
WG28338	MvsR	complete	1.19657	0.790649	1.60248	18.824	6.15801	5.66395e-06	1.98147e-05	3.79305	12	up	4.70301
WG22239	TvsM	MAR	1.278	0.915441	1.64056	20.2243	7.58362	3.0954e-06	2.0165e-05	4.539	11	up	4.6954
WG08025	TvsM	MAR	1.29542	0.940672	1.65017	19.1829	7.91745	3.13482e-06	2.03374e-05	4.65384	10	up	4.6917
WG27184	TvsM	complete	1.06017	0.741061	1.37928	19.6347	7.05938	3.16443e-06	2.04451e-05	4.3441	12	up	4.68941
WG16533	TvsM	complete	1.05783	0.747047	1.36862	19.8377	7.27428	3.2458e-06	2.08753e-05	4.38081	12	up	4.68037
WG27562	TvsM	complete	1.23252	0.870171	1.59487	19.884	7.26945	3.27091e-06	2.08753e-05	4.37283	12	up	4.68037
WG27610	TvsR	complete	1.73651	1.10968	2.36335	20.4184	5.78714	1.26482e-05	2.09036e-05	2.63423	12	up	4.67978
WG13508	MvsR	MAR	1.42724	0.947088	1.90739	19.882	6.23159	6.13498e-06	2.13245e-05	3.78495	11	up	4.67112
WG09163	TvsR	MNAR	1.62953	1.08802	2.17103	19.5418	6.43122	1.30568e-05	2.15145e-05	3.31893	7	up	4.66727
WG19057	TvsR	complete	1.06262	0.677873	1.44737	19.2675	5.76954	1.31451e-05	2.16277e-05	2.59502	12	up	4.66499
WG12992	TvsM	complete	1.02666	0.714856	1.33845	19.6391	6.99645	3.5245e-06	2.23124e-05	4.23289	12	up	4.65145
WG18376	TvsR	MAR	1.15525	0.740702	1.56981	19.5405	5.84223	1.38157e-05	2.26299e-05	2.624	11	up	4.64532
WG03516	TvsR	MAR	-1.04161	-1.40504	-0.678185	18.4555	-6.05934	1.43037e-05	2.33944e-05	2.73032	10	down	4.63089
WG16846	MvsR	complete	-1.19216	-1.6027	-0.781617	21.041	-6.06621	6.89926e-06	2.38278e-05	3.59376	12	down	4.62292
WG10681	TvsM	complete	1.05985	0.721951	1.39775	19.2307	6.60176	3.81874e-06	2.38862e-05	4.04548	12	up	4.62185
WG26005	TvsM	complete	1.10056	0.75618	1.44494	19.6705	6.75634	3.85867e-06	2.40401e-05	4.08418	12	up	4.61906
WG20848	TvsM	complete	1.00623	0.674338	1.33811	19.3937	6.33352	3.89583e-06	2.41757e-05	3.94068	12	up	4.61662
WG22890	TvsM	complete	1.16854	0.781926	1.55514	19.9932	6.3141	4.05974e-06	2.49767e-05	3.89871	12	up	4.60247
WG19741	TvsM	complete	1.04539	0.699439	1.39133	19.6889	6.31261	4.07263e-06	2.49767e-05	3.89548	12	up	4.60247
WG10241	TvsM	complete	1.36835	0.9151	1.8216	19.5918	6.30666	4.1244e-06	2.51418e-05	3.88262	12	up	4.5996
WG11356	TvsM	complete	1.11278	0.778951	1.44661	20.0794	7.1239	4.13158e-06	2.51418e-05	4.13087	12	up	4.5996
WG11479	TvsR	MAR	2.23476	1.43652	3.03299	20.0754	5.8925	1.55637e-05	2.53801e-05	2.59934	10	up	4.59551
WG24345	TvsR	MAR	1.22458	0.780663	1.66849	20.8122	5.7832	1.56515e-05	2.54856e-05	2.49682	11	up	4.59371
WG23096	TvsM	complete	1.03259	0.721825	1.34336	19.0741	7.10112	4.28648e-06	2.58838e-05	4.09275	12	up	4.58697
WG17350	MvsR	MAR	2.65437	1.76066	3.54808	21.8075	6.25123	7.58304e-06	2.59407e-05	3.65643	10	up	4.58602
WG18499	TvsR	MAR	1.15514	0.734607	1.57568	18.8182	5.75855	1.64905e-05	2.67335e-05	2.44359	11	up	4.57294
WG32495	MvsR	complete	-1.45362	-1.95943	-0.947811	21.4505	-6.00351	7.89912e-06	2.67679e-05	3.45709	12	down	4.57239
WG07747	MvsR	complete	1.60196	1.04262	2.16129	20.711	5.98304	8.257e-06	2.78063e-05	3.41236	12	up	4.55586
WG22652	TvsM	MAR	1.28651	0.907746	1.66527	19.497	7.30751	4.66469e-06	2.78462e-05	4.11313	11	up	4.55523
WG24918	MvsR	complete	1.44608	0.940949	1.95122	20.5129	5.98036	8.30498e-06	2.7881e-05	3.40651	12	up	4.55469
WG23633	TvsM	complete	1.05004	0.731218	1.36887	19.4671	7.03865	4.7435e-06	2.82094e-05	3.98783	12	up	4.54961
WG06589	TvsM	complete	1.16022	0.798506	1.52193	19.192	6.8156	4.81839e-06	2.85467e-05	3.9103	12	up	4.54444
WG05937	MvsR	complete	1.20842	0.785262	1.63157	21.6085	5.96566	8.57378e-06	2.86057e-05	3.37435	12	up	4.54355
WG27404	TvsM	complete	1.68338	1.17085	2.19591	20.9463	7.01931	4.89508e-06	2.8892e-05	3.95525	12	up	4.53922
WG28764	TvsM	MAR	1.41808	0.997024	1.83913	20.9627	7.24584	5.11895e-06	3.01002e-05	4.01664	11	up	4.52143
WG07763	TvsM	complete	1.37725	0.913216	1.84128	19.5535	6.20018	5.17512e-06	3.03169e-05	3.65156	12	up	4.51831
WG16142	TvsM	MAR	1.26924	0.904432	1.63405	20.8978	7.54356	5.2147e-06	3.03276e-05	4.12456	10	up	4.51816
WG23498	TvsM	MAR	1.29151	0.886162	1.69685	20.9366	6.77019	5.21558e-06	3.03276e-05	3.90368	10	up	4.51816
WG03091	MvsR	complete	-1.68022	-2.23356	-1.12687	19.9526	-6.45207	9.15684e-06	3.03636e-05	3.47641	12	down	4.51765
WG15193	TvsR	complete	1.43568	0.90051	1.97085	19.6647	5.60413	1.89159e-05	3.05756e-05	2.22498	12	up	4.51462
WG05545	TvsM	complete	1.13108	0.783972	1.47819	20.2879	6.96403	5.3573e-06	3.08233e-05	3.86182	12	up	4.51112
WG03184	TvsM	complete	1.37934	0.913367	1.8453	19.8373	6.18379	5.35971e-06	3.08233e-05	3.61589	12	up	4.51112
WG13993	TvsM	complete	1.07332	0.710242	1.43639	20.2965	6.17552	5.45541e-06	3.11518e-05	3.59788	12	up	4.50652
WG03280	TvsM	complete	1.63957	1.10191	2.17723	20.7995	6.41834	5.45653e-06	3.11518e-05	3.67993	12	up	4.50652
WG23345	MvsR	complete	1.06066	0.686486	1.43483	20.049	5.92167	9.43247e-06	3.1182e-05	3.278	12	up	4.5061
WG25550	TvsM	complete	1.06581	0.705123	1.42651	19.2101	6.17288	5.48638e-06	3.12088e-05	3.59212	12	up	4.50572
WG30786	TvsM	complete	1.02998	0.713003	1.34696	20.0659	6.94441	5.53221e-06	3.13558e-05	3.82855	12	up	4.50368
WG14774	TvsM	complete	1.60384	1.07708	2.1306	20.7009	6.40843	5.56343e-06	3.13872e-05	3.66007	12	up	4.50325
WG17318	TvsM	complete	1.3895	0.9329	1.8461	22.248	6.40506	5.60032e-06	3.14018e-05	3.6533	12	up	4.50305
WG29454	MvsR	MAR	-1.89691	-2.49348	-1.30033	19.8963	-6.84077	9.54195e-06	3.14477e-05	3.58492	11	down	4.50241
WG28245	TvsM	complete	1.02058	0.684958	1.3562	19.5384	6.40026	5.65328e-06	3.15859e-05	3.64366	12	up	4.50051
WG25144	TvsR	MAR	1.62708	1.02616	2.228	19.5821	5.67641	1.96349e-05	3.16914e-05	2.26579	11	up	4.49906
WG11656	TvsR	MNAR	1.88054	1.24687	2.51421	19.1377	6.38477	1.97473e-05	3.18263e-05	2.95536	7	up	4.49721
WG32152	TvsM	MAR	1.71586	1.21776	2.21395	19.0019	7.46905	5.78297e-06	3.2196e-05	4.01696	10	up	4.4922
WG26974	TvsM	MAR	1.03572	0.72417	1.34727	19.6385	7.15222	5.90002e-06	3.27316e-05	3.86918	11	up	4.48503
WG11741	MvsR	complete	1.27347	0.821721	1.72522	20.4285	5.88888	1.01297e-05	3.31824e-05	3.20603	12	up	4.47909
WG29214	MvsR	MAR	-1.54625	-2.08821	-1.0043	20.3687	-5.98132	1.03151e-05	3.36876e-05	3.25989	11	down	4.47253
WG25902	TvsM	MAR	1.39335	0.986284	1.80041	20.0259	7.42156	6.17928e-06	3.41601e-05	3.948	10	up	4.46648
WG13672	TvsM	complete	1.24106	0.85516	1.62697	19.4561	6.87305	6.22045e-06	3.4267e-05	3.70715	12	up	4.46512
WG15696	TvsM	complete	1.09006	0.728245	1.45188	20.5781	6.34109	6.35015e-06	3.47377e-05	3.52466	12	up	4.4592
WG26809	TvsR	MNAR	2.41188	1.57016	3.25359	20.3289	6.12387	2.22185e-05	3.56529e-05	2.78078	7	up	4.44791
WG28177	TvsR	MAR	1.0982	0.699917	1.49648	20.0052	5.82941	2.23568e-05	3.58228e-05	2.27257	10	up	4.44584
WG03893	TvsR	complete	1.77462	1.10367	2.44556	22.6089	5.52536	2.25204e-05	3.60326e-05	2.04781	12	up	4.4433
WG27618	MvsR	MNAR	2.1229	1.42755	2.81826	19.2243	6.52466	1.11371e-05	3.62626e-05	3.64056	7	up	4.44054
WG18337	MvsR	MAR	1.07702	0.697025	1.45701	19.6628	5.94192	1.12023e-05	3.63654e-05	3.17655	11	up	4.43931
WG13756	TvsM	complete	1.54409	1.03622	2.05197	20.2004	6.42769	7.09826e-06	3.81653e-05	3.4579	12	up	4.41833
WG09846	TvsM	complete	1.18685	0.77673	1.59697	20.1703	6.04542	7.21546e-06	3.84316e-05	3.31339	12	up	4.41531
WG15907	TvsM	complete	1.08019	0.739857	1.42051	19.4495	6.78319	7.21744e-06	3.84316e-05	3.55326	12	up	4.41531
WG15537	TvsM	complete	1.01499	0.695185	1.33479	20.4418	6.78287	7.22123e-06	3.84316e-05	3.55272	12	up	4.41531
WG20978	TvsM	complete	1.07319	0.734591	1.41179	19.7313	6.77371	7.3319e-06	3.87579e-05	3.53697	12	up	4.41164
WG19715	TvsM	complete	1.28028	0.857066	1.70349	19.0363	6.39561	7.53936e-06	3.97208e-05	3.39599	12	up	4.40098
WG15907	TvsR	MNAR	1.80458	1.16788	2.44128	19.4495	6.05728	2.49736e-05	3.98999e-05	2.66243	7	up	4.39903
WG28372	TvsM	complete	1.09408	0.747545	1.44062	19.1733	6.74738	7.6601e-06	4.00289e-05	3.49165	12	up	4.39763
WG22856	TvsM	complete	1.5601	1.01844	2.10176	21.3725	6.01687	7.67434e-06	4.00289e-05	3.25069	12	up	4.39763
WG20364	MvsR	complete	1.18907	0.760468	1.61766	19.4901	5.79558	1.24167e-05	4.00671e-05	3.00062	12	up	4.39721
WG06385	TvsM	complete	1.0009	0.653196	1.34859	20.6336	6.01349	7.73057e-06	4.01887e-05	3.24326	12	up	4.3959
WG10187	MvsR	complete	-1.3148	-1.78959	-0.84001	20.0517	-5.78495	1.2709e-05	4.08883e-05	2.97715	12	down	4.3884
WG05315	TvsR	MNAR	2.20045	1.45917	2.94173	20.3734	6.43618	2.60946e-05	4.16307e-05	2.73406	7	up	4.38059
WG08668	MvsR	MAR	-1.38088	-1.8146	-0.947151	19.7358	-6.90297	1.29816e-05	4.16412e-05	3.37967	10	down	4.38048
WG24087	TvsM	complete	1.30777	0.891663	1.72387	19.3579	6.71682	8.06058e-06	4.1766e-05	3.43891	12	up	4.37918
WG30866	TvsM	complete	1.41967	0.923717	1.91562	21.1953	5.97982	8.31469e-06	4.2941e-05	3.1692	12	up	4.36713
WG27733	TvsM	complete	1.20462	0.795359	1.61388	20.1012	6.19515	8.47558e-06	4.35133e-05	3.22923	12	up	4.36138
WG10516	TvsM	MAR	1.47331	1.01502	1.9316	19.2249	6.91637	8.48094e-06	4.35133e-05	3.49244	11	up	4.36138
WG17515	TvsM	MAR	1.67288	1.16785	2.17792	19.9837	7.18193	8.67074e-06	4.4283e-05	3.59554	10	up	4.35376
WG20364	TvsM	complete	1.22099	0.792391	1.64959	19.4901	5.95118	8.84722e-06	4.48069e-05	3.10609	12	up	4.34866
WG09739	TvsM	complete	1.63316	1.08552	2.1808	19.0524	6.30479	8.94939e-06	4.50338e-05	3.21997	12	up	4.34646
WG00514	TvsR	MNAR	1.42649	0.916703	1.93627	21.2406	5.98019	2.86142e-05	4.54533e-05	2.52466	7	up	4.34243
WG03656	TvsM	complete	1.38696	0.940567	1.83336	20.9082	6.64015	9.16477e-06	4.59703e-05	3.30605	12	up	4.33752
WG18371	TvsR	complete	2.67109	1.63664	3.70553	20.2689	5.39414	3.01574e-05	4.78358e-05	1.75145	12	up	4.32025
WG13624	MvsR	MAR	2.44152	1.57144	3.31161	21.0738	5.90611	1.51399e-05	4.79949e-05	2.95804	10	up	4.3188
WG11989	TvsM	MAR	1.57297	1.09242	2.05351	18.8229	7.09707	9.79283e-06	4.85008e-05	3.46892	10	up	4.31425
WG01328	TvsM	MAR	-1.22346	-1.64485	-0.802066	19.6171	-6.11085	1.00267e-05	4.93478e-05	3.15253	10	down	4.30673
WG01334	TvsR	complete	-1.30861	-1.81697	-0.800262	21.2394	-5.3776	3.12926e-05	4.95654e-05	1.71397	12	down	4.30482
WG12961	TvsR	complete	1.09325	0.667892	1.51862	20.2287	5.36913	3.18901e-05	5.04394e-05	1.69478	12	up	4.29723
WG30870	TvsR	MAR	2.41458	1.49743	3.33173	19.0782	5.54116	3.19833e-05	5.05144e-05	1.80682	11	up	4.29659
WG04469	TvsM	MAR	1.6872	1.16902	2.20539	19.4482	7.05957	1.0337e-05	5.05193e-05	3.41264	10	up	4.29654
WG10894	TvsM	MAR	1.0834	0.750579	1.41621	20.2547	7.05795	1.03613e-05	5.05193e-05	3.41021	10	up	4.29654
WG00772	TvsM	MAR	1.59188	1.08655	2.09721	18.9613	6.77735	1.05398e-05	5.09152e-05	3.26685	11	up	4.29315
WG12175	TvsM	complete	1.38015	0.93014	1.83016	20.0984	6.5545	1.05883e-05	5.09927e-05	3.15667	12	up	4.29249
WG26503	MvsR	complete	1.67813	1.05975	2.29651	20.6842	5.66909	1.63905e-05	5.18073e-05	2.72063	12	up	4.28561
WG19578	MvsR	MNAR	2.24544	1.48283	3.00806	21.0533	6.29262	1.65671e-05	5.2213e-05	3.25467	7	up	4.28222
WG30221	MvsR	complete	1.0191	0.643106	1.39509	20.9757	5.66212	1.6644e-05	5.23028e-05	2.70516	12	up	4.28148
WG29180	TvsM	complete	1.02512	0.68965	1.3606	19.5919	6.53059	1.10256e-05	5.24551e-05	3.1148	12	up	4.28021
WG20630	TvsR	complete	-2.11595	-2.94238	-1.28953	20.5269	-5.34867	3.33831e-05	5.25748e-05	1.64839	12	down	4.27922
WG23434	TvsM	complete	1.00938	0.678779	1.33998	20.0043	6.52505	1.11297e-05	5.27905e-05	3.10508	12	up	4.27744
WG19522	TvsR	MAR	2.02834	1.25428	2.8024	19.0297	5.51528	3.37461e-05	5.30707e-05	1.80966	10	up	4.27514
WG06393	TvsM	complete	1.09764	0.71031	1.48497	20.9335	5.94102	1.12235e-05	5.30752e-05	2.90118	12	up	4.27511
WG13119	MvsR	MNAR	1.99417	1.31545	2.67288	20.3764	6.27925	1.69547e-05	5.31247e-05	3.23218	7	up	4.2747
WG00242	TvsR	MAR	1.28082	0.785263	1.77638	20.1899	5.41843	3.41472e-05	5.36252e-05	1.70273	11	up	4.27063
WG31557	TvsM	complete	1.03417	0.66302	1.40533	20.5402	5.82078	1.17514e-05	5.50735e-05	2.81764	12	up	4.25906
WG16636	TvsM	MNAR	-2.70471	-3.59805	-1.81138	19.7651	-6.47054	1.22099e-05	5.70521e-05	3.45416	7	down	4.24373
WG03614	TvsM	complete	1.25073	0.837068	1.6644	19.7234	6.46176	1.23939e-05	5.77399e-05	2.9938	12	up	4.23852
WG12790	TvsM	complete	1.39721	0.892981	1.90144	20.4958	5.78863	1.26071e-05	5.83999e-05	2.74625	12	up	4.23359
WG22856	MvsR	complete	1.45145	0.909794	1.99311	21.3725	5.59784	1.9181e-05	5.87385e-05	2.56217	12	up	4.23108
WG14274	TvsM	MAR	1.36778	0.925302	1.81026	19.9527	6.65043	1.28823e-05	5.94857e-05	3.05857	11	up	4.22559
WG14779	TvsM	complete	1.20202	0.80268	1.60135	20.1986	6.4329	1.30195e-05	5.96083e-05	2.94288	12	up	4.22469
WG18429	TvsM	MAR	1.55804	1.0535	2.06258	17.9102	6.64361	1.30227e-05	5.96083e-05	3.04732	11	up	4.22469
WG01226	TvsM	MAR	1.26104	0.864619	1.65746	20.0712	6.89713	1.3093e-05	5.97557e-05	3.16673	10	up	4.22362
WG27860	TvsR	MNAR	2.0989	1.32768	2.87012	19.606	5.81632	3.83181e-05	6.00898e-05	2.22902	7	up	4.2212
WG24514	TvsM	complete	1.20883	0.797673	1.61998	19.8245	6.24723	1.32537e-05	6.03138e-05	2.8675	12	up	4.21958
WG22826	MvsR	complete	-1.1573	-1.55696	-0.757649	20.6435	-6.18865	1.98417e-05	6.04194e-05	2.73953	12	down	4.21882
WG14396	TvsM	complete	1.11887	0.713067	1.52468	20.5993	5.75974	1.34307e-05	6.09428e-05	2.68199	12	up	4.21508
WG15483	TvsR	complete	2.1743	1.31354	3.03506	21.167	5.27689	3.92082e-05	6.13984e-05	1.48537	12	up	4.21184
WG11989	TvsR	MNAR	2.28875	1.48464	3.09286	18.8229	6.17135	3.92894e-05	6.14384e-05	2.31701	7	up	4.21156
WG10462	TvsR	complete	1.14316	0.689923	1.59639	19.6511	5.26897	3.99112e-05	6.23225e-05	1.46736	12	up	4.20536
WG31197	TvsM	complete	1.28734	0.837387	1.73729	19.1665	6.04873	1.45992e-05	6.54877e-05	2.71792	12	up	4.18384
WG21154	TvsM	MAR	1.43568	0.965466	1.90589	19.6294	6.56886	1.46727e-05	6.56302e-05	2.92354	11	up	4.1829
WG17222	MvsR	MNAR	1.70453	1.10896	2.3001	20.9121	6.11655	2.25051e-05	6.73907e-05	2.95642	7	up	4.1714
WG18425	TvsM	MAR	1.15447	0.785986	1.52295	20.0225	6.79301	1.52623e-05	6.76886e-05	3.00722	10	up	4.16948
WG04027	TvsM	complete	1.21014	0.802043	1.61824	20.0196	6.33731	1.53383e-05	6.78341e-05	2.7734	12	up	4.16855
WG14774	MvsR	MAR	1.59668	1.00775	2.18561	20.7009	5.70627	2.2755e-05	6.79507e-05	2.5468	10	up	4.16781
WG32306	TvsM	complete	1.08143	0.695428	1.46743	19.9697	5.8967	1.54315e-05	6.80548e-05	2.61669	12	up	4.16714
WG29898	TvsR	MNAR	2.2611	1.41949	3.1027	19.444	5.74177	4.38157e-05	6.83229e-05	2.0933	7	up	4.16543
WG05549	TvsM	MAR	2.17779	1.48095	2.87463	18.175	6.77608	1.56496e-05	6.86166e-05	2.98114	10	up	4.16357
WG14846	TvsM	complete	1.23244	0.791924	1.67295	20.6629	5.88854	1.56889e-05	6.86166e-05	2.5998	12	up	4.16357
WG19910	TvsM	complete	1.08305	0.685147	1.48094	19.6751	5.68613	1.57873e-05	6.86593e-05	2.51789	12	up	4.1633
WG31396	TvsM	MAR	1.27714	0.867948	1.68633	19.0302	6.7672	1.58571e-05	6.87723e-05	2.96744	10	up	4.16259
WG18376	MvsR	MAR	1.10705	0.692499	1.5216	19.5405	5.59847	2.31892e-05	6.89505e-05	2.44228	11	up	4.16146
WG26624	TvsM	complete	1.59654	1.05591	2.13716	19.0058	6.31129	1.60418e-05	6.91911e-05	2.72705	12	up	4.15995
WG27338	TvsM	MAR	1.34993	0.902784	1.79707	19.6694	6.49516	1.65162e-05	7.06553e-05	2.80076	11	up	4.15086
WG11620	MvsR	MAR	1.09797	0.685493	1.51045	19.3156	5.58048	2.40993e-05	7.07916e-05	2.40346	11	up	4.15002
WG24990	MvsR	complete	-1.80304	-2.48887	-1.11721	17.8866	-5.49197	2.42531e-05	7.0916e-05	2.32583	12	down	4.14926
WG23306	MvsR	complete	1.26552	0.784113	1.74692	20.7165	5.4916	2.42728e-05	7.0916e-05	2.325	12	up	4.14926
WG25736	TvsM	complete	1.02812	0.648664	1.40758	19.2505	5.6601	1.67185e-05	7.13262e-05	2.45973	12	up	4.14675
WG26746	TvsR	complete	1.75751	1.05238	2.46264	21.1403	5.20679	4.58994e-05	7.13704e-05	1.32576	12	up	4.14648
WG26746	MvsR	complete	1.845	1.13987	2.55013	21.1403	5.46597	2.56964e-05	7.46715e-05	2.26762	12	up	4.12685
WG26244	TvsM	MAR	1.84651	1.23099	2.46202	19.2903	6.45412	1.76471e-05	7.46792e-05	2.73207	11	up	4.1268
WG16358	TvsM	complete	1.09993	0.723553	1.4763	20.1614	6.24565	1.79703e-05	7.53077e-05	2.60971	12	up	4.12316
WG30512	TvsM	complete	1.04071	0.684564	1.39685	19.8531	6.2451	1.79875e-05	7.53077e-05	2.60872	12	up	4.12316
WG29133	MvsR	complete	1.23788	0.763736	1.71202	21.1143	5.45396	2.63923e-05	7.62838e-05	2.24071	12	up	4.11757
WG07344	TvsM	complete	1.09347	0.718279	1.46867	19.3672	6.22852	1.85125e-05	7.68907e-05	2.57899	12	up	4.11413
WG22975	TvsR	MNAR	1.94281	1.2417	2.64393	18.0375	6.00813	5.08046e-05	7.87061e-05	2.05494	7	up	4.10399
WG22583	TvsR	complete	1.29657	0.771811	1.82134	19.9932	5.1615	5.0831e-05	7.87061e-05	1.22245	12	up	4.10399
WG09082	TvsM	complete	1.15577	0.749543	1.562	20.5198	6.04549	1.91843e-05	7.94706e-05	2.48689	12	up	4.09979
WG10941	TvsM	complete	1.105	0.724094	1.4859	21.9681	6.19984	1.9459e-05	8.01855e-05	2.52746	12	up	4.0959
WG12501	TvsM	MAR	1.60145	1.06241	2.1405	20.197	6.39171	1.9526e-05	8.02507e-05	2.62714	11	up	4.09555
WG16073	MvsR	complete	-1.365	-1.8612	-0.868789	26.7916	-5.84517	2.78491e-05	8.02798e-05	2.3414	12	down	4.09539
WG14357	TvsM	MAR	1.58707	1.05103	2.12311	20.027	6.36978	2.0235e-05	8.25169e-05	2.59015	11	up	4.08346
WG05948	MvsR	complete	1.12724	0.691844	1.56264	19.9808	5.40845	2.92097e-05	8.37551e-05	2.13862	12	up	4.07699
WG15452	TvsM	complete	1.23136	0.804336	1.65839	20.1826	6.16264	2.07625e-05	8.37972e-05	2.46047	12	up	4.07677
WG01404	TvsR	MNAR	2.16303	1.34065	2.98542	20.2494	5.6211	5.45223e-05	8.43034e-05	1.87204	7	up	4.07415
WG26014	TvsM	complete	1.05351	0.656977	1.45004	20.0838	5.55014	2.13166e-05	8.58129e-05	2.2133	12	up	4.06645
WG26395	MvsR	complete	-1.13739	-1.54593	-0.728856	19.3261	-5.94997	3.01892e-05	8.59033e-05	2.30987	12	down	4.06599
WG07448	MvsR	MAR	1.29741	0.800499	1.79433	20.2453	5.47365	3.03128e-05	8.59033e-05	2.17224	11	up	4.06599
WG11731	MvsR	complete	1.02521	0.627953	1.42246	20.6945	5.3912	3.03562e-05	8.59033e-05	2.09987	12	up	4.06599
WG12103	TvsR	complete	1.21235	0.716719	1.70798	19.731	5.10988	5.71143e-05	8.80645e-05	1.10452	12	up	4.0552
WG02241	TvsM	complete	1.42283	0.926693	1.91898	19.0194	6.1289	2.20234e-05	8.81121e-05	2.39957	12	up	4.05496
WG27231	TvsM	complete	1.82946	1.17833	2.48059	20.408	5.97017	2.20561e-05	8.81121e-05	2.34342	12	up	4.05496
WG07467	TvsR	MNAR	1.98351	1.2257	2.74132	20.0184	5.59383	5.72998e-05	8.82272e-05	1.82176	7	up	4.0544
WG06325	TvsM	complete	1.00228	0.623597	1.38095	20.7494	5.52914	2.2332e-05	8.8988e-05	2.16613	12	up	4.05067
WG11789	TvsM	MAR	1.08826	0.715963	1.46056	19.7569	6.28878	2.30981e-05	9.18076e-05	2.45294	11	up	4.03712
WG02560	TvsM	MAR	1.43606	0.93219	1.93993	19.9153	6.09098	2.35372e-05	9.33166e-05	2.42605	10	up	4.03004
WG13739	TvsM	complete	1.74477	1.13196	2.35758	19.8266	6.08477	2.3795e-05	9.41012e-05	2.31965	12	up	4.0264
WG11333	TvsR	MNAR	2.88692	1.79747	3.97636	20.5484	5.70105	6.20055e-05	9.49432e-05	1.7932	7	up	4.02254
WG06294	TvsM	MAR	1.48594	0.98843	1.98345	19.7251	6.47587	2.45627e-05	9.64084e-05	2.51223	10	up	4.01588
WG02921	TvsM	complete	1.25941	0.806436	1.71239	21.6796	5.90775	2.47736e-05	9.69939e-05	2.22396	12	up	4.01326
WG23584	TvsR	complete	1.03542	0.607552	1.46328	19.6364	5.05532	6.46172e-05	9.88052e-05	0.9797	12	up	4.00522
WG31061	MvsR	MNAR	1.59859	1.01422	2.18295	19.6869	5.84641	3.6308e-05	0.000101418	2.48982	7	up	3.99388
WG09109	MvsR	complete	1.10006	0.667048	1.53307	20.7403	5.30709	3.66405e-05	0.000102083	1.91059	12	up	3.99105
WG16636	MvsR	complete	-1.30475	-1.78226	-0.827246	19.7651	-5.83959	3.67538e-05	0.000102136	2.10854	12	down	3.99082
WG03109	TvsM	complete	1.10632	0.706253	1.5064	20.1057	5.87588	2.6293e-05	0.000102178	2.16277	12	up	3.99064
WG11636	TvsM	complete	1.69045	1.04289	2.33801	20.2036	5.45338	2.6427e-05	0.000102445	1.99551	12	up	3.98951
WG19371	MvsR	complete	1.53593	0.93023	2.14162	20.2286	5.29733	3.74513e-05	0.000103807	1.88858	12	up	3.98377
WG01783	TvsR	MNAR	2.95031	1.80044	4.10018	21.8899	5.48344	7.01361e-05	0.000106948	1.61723	7	up	3.97083
WG12552	TvsR	MAR	1.8018	1.06696	2.53664	20.6584	5.16078	7.09383e-05	0.000108022	1.05367	10	up	3.96649
WG07064	MvsR	complete	1.4535	0.877818	2.02918	19.4628	5.27442	3.94265e-05	0.000109003	1.83689	12	up	3.96256
WG09950	MvsR	complete	-1.06925	-1.46386	-0.674636	20.3315	-5.79085	4.01105e-05	0.000110254	2.01914	12	down	3.95761
WG20687	MvsR	complete	1.23164	0.743046	1.72024	19.3302	5.26593	4.01851e-05	0.000110254	1.81773	12	up	3.95761
WG17437	TvsM	complete	1.03594	0.645948	1.42593	21.4029	5.59088	2.88564e-05	0.000110499	1.97797	12	up	3.95664
WG29766	TvsM	MAR	1.88956	1.19998	2.57915	20.4638	5.82239	2.90646e-05	0.000110756	2.10143	11	up	3.95563
WG00454	TvsM	MAR	1.14816	0.745893	1.55043	19.2212	6.14064	2.94922e-05	0.000112094	2.19966	11	up	3.95042
WG03129	MvsR	MNAR	1.45021	0.913637	1.98678	19.992	5.77614	4.1186e-05	0.000112714	2.36668	7	up	3.94802
WG12629	TvsM	complete	1.05858	0.64863	1.46852	19.1288	5.39432	3.01455e-05	0.000112956	1.86217	12	up	3.94709
WG18422	TvsR	MNAR	1.36535	0.829578	1.90112	20.4772	5.44628	7.51022e-05	0.000114205	1.54802	7	up	3.94231
WG14201	TvsM	MAR	1.089	0.705573	1.47242	19.4736	6.11043	3.1011e-05	0.000115647	2.14763	11	up	3.93687
WG05501	TvsM	MAR	2.00074	1.2956	2.70588	17.8723	6.10435	3.13263e-05	0.000116546	2.13715	11	up	3.9335
WG32603	TvsR	MNAR	1.95891	1.20226	2.71556	19.4607	5.56986	7.78044e-05	0.000117989	1.56268	7	up	3.92816
WG08313	MvsR	MNAR	1.83641	1.15263	2.52019	19.9424	5.73966	4.39831e-05	0.000119462	2.30247	7	up	3.92277
WG31687	TvsR	MNAR	1.79312	1.08544	2.5008	19.503	5.41511	7.95482e-05	0.000120288	1.48984	7	up	3.91978
WG16086	TvsR	MAR	1.36483	0.795588	1.93407	18.3763	5.02646	8.02676e-05	0.000121059	0.83553	11	up	3.917
WG12558	TvsM	MNAR	2.22464	1.54214	2.90714	18.9664	7.30889	3.29115e-05	0.000121269	2.79268	7	up	3.91625
WG25650	TvsM	MAR	1.15929	0.748634	1.56996	18.7563	6.07345	3.29821e-05	0.000121269	2.08379	11	up	3.91625
WG31687	TvsM	complete	1.04339	0.665119	1.42166	19.503	5.89492	3.32947e-05	0.000121612	1.97288	12	up	3.91502
WG03221	TvsM	complete	1.71167	1.08982	2.33352	21.9732	5.88259	3.4035e-05	0.00012357	1.95018	12	up	3.90809
WG00519	TvsM	complete	1.05606	0.672124	1.44001	19.8359	5.87841	3.42898e-05	0.000124044	1.94249	12	up	3.90643
WG30674	TvsR	MNAR	2.30091	1.38774	3.21409	18.6381	5.38492	8.41172e-05	0.000126692	1.43336	7	up	3.89725
WG20472	MvsR	complete	1.12361	0.671384	1.57584	19.035	5.1904	4.76248e-05	0.000128706	1.64701	12	up	3.8904
WG24301	TvsM	complete	1.05938	0.672305	1.44645	20.3606	5.84916	3.61293e-05	0.000129505	1.88858	12	up	3.88771
WG23596	MvsR	complete	1.00057	0.597379	1.40376	21.0481	5.18416	4.82992e-05	0.000129557	1.63288	12	up	3.88754
WG13123	MvsR	complete	1.13727	0.678545	1.596	20.3871	5.17907	4.88561e-05	0.000130726	1.62137	12	up	3.88364
WG15876	TvsR	MNAR	1.71741	1.03344	2.40138	19.374	5.36623	8.70818e-05	0.000130979	1.39833	7	up	3.8828
WG22220	TvsM	complete	1.13964	0.690852	1.58842	19.9165	5.30481	3.6828e-05	0.000131708	1.65951	12	up	3.88039
WG03151	TvsM	complete	1.44935	0.918704	1.98	21.1929	5.83714	3.69148e-05	0.000131719	1.86639	12	up	3.88035
WG23019	TvsM	MAR	1.65994	1.01213	2.30774	20.0674	5.37187	3.77639e-05	0.000133836	1.70972	11	up	3.87343
WG12823	MvsR	complete	-1.03369	-1.45286	-0.614531	21.7332	-5.15169	5.1968e-05	0.00013769	1.55934	12	down	3.8611
WG03201	MvsR	complete	3.82879	2.27329	5.38428	21.9889	5.14203	5.31137e-05	0.000140039	1.53743	12	up	3.85375
WG11659	MvsR	MAR	1.62569	0.971842	2.27954	19.8761	5.21244	5.3403e-05	0.000140459	1.60209	11	up	3.85245
WG26811	TvsR	complete	1.17305	0.671801	1.67431	19.316	4.8888	9.43314e-05	0.000141305	0.597567	12	up	3.84984
WG16775	TvsM	complete	1.03909	0.635969	1.44221	20.1438	5.42523	4.06994e-05	0.00014263	1.62763	12	up	3.84579
WG14269	TvsM	complete	1.1084	0.667988	1.54881	20.6101	5.25749	4.0954e-05	0.000142884	1.55209	12	up	3.84502
WG19083	MvsR	complete	-1.17282	-1.65144	-0.694193	20.9742	-5.11891	5.59606e-05	0.000146473	1.485	12	down	3.83424
WG18756	TvsM	MAR	1.38801	0.872535	1.90348	17.8494	5.75466	4.28095e-05	0.000146749	1.75536	11	up	3.83343
WG03928	MvsR	MAR	1.0377	0.622855	1.45255	21.0008	5.26484	5.69542e-05	0.000148142	1.62214	10	up	3.82932
WG31232	MvsR	complete	-1.25221	-1.73044	-0.77398	19.7308	-5.59595	5.70785e-05	0.000148142	1.65842	12	down	3.82932
WG06126	MvsR	complete	1.1335	0.670081	1.59692	21.3786	5.10963	5.71462e-05	0.000148142	1.46395	12	up	3.82932
WG21590	TvsM	MAR	1.7405	1.1224	2.3586	20.9276	6.10537	4.35717e-05	0.000149036	1.91634	10	up	3.82671
WG19631	MvsR	complete	1.02161	0.603	1.44022	20.7953	5.09821	5.86406e-05	0.000151652	1.43803	12	up	3.81915
WG05516	MvsR	MAR	1.95764	1.19335	2.72193	19.8525	5.44256	5.98685e-05	0.00015409	1.67967	9	up	3.81223
WG27772	TvsR	complete	1.02149	0.58087	1.46211	20.3094	4.84296	0.000104726	0.000155819	0.492114	12	up	3.80738
WG10009	TvsM	complete	1.02415	0.61304	1.43525	18.6088	5.20414	4.61736e-05	0.000156572	1.4308	12	up	3.80529
WG25166	TvsM	MAR	1.14146	0.73307	1.54985	20.7297	6.06012	4.67921e-05	0.000157986	1.84225	10	up	3.80138
WG12904	MvsR	MAR	1.25068	0.745826	1.75554	21.3554	5.21412	6.33781e-05	0.000161966	1.51459	10	up	3.79058
WG21154	TvsR	MNAR	2.09494	1.2562	2.93368	19.6294	5.37363	0.00010974	0.00016306	1.21351	7	up	3.78765
WG10284	TvsM	complete	1.22568	0.731284	1.72007	21.0616	5.17898	4.88664e-05	0.000163413	1.37351	12	up	3.78671
WG12617	TvsM	complete	-1.15398	-1.6195	-0.688463	20.0239	-5.1785	4.89198e-05	0.000163413	1.3724	12	down	3.78671
WG28520	TvsR	MNAR	1.85876	1.12949	2.58803	19.7248	5.52626	0.000110886	0.000164541	1.259	7	up	3.78373
WG10179	MvsR	complete	1.03909	0.608704	1.46947	18.605	5.04356	6.6363e-05	0.0001684	1.31386	12	up	3.77366
WG21165	MvsR	complete	1.38572	0.811406	1.96004	20.7431	5.04041	6.68379e-05	0.000169208	1.3067	12	up	3.77158
WG29175	MvsR	MNAR	-1.67866	-2.33021	-1.02712	20.1241	-5.50622	6.72608e-05	0.000169881	1.88704	7	down	3.76986
WG15338	TvsM	complete	1.49892	0.932418	2.06542	18.5647	5.65473	5.12893e-05	0.000170964	1.52732	12	up	3.76709
WG02180	TvsR	complete	1.88393	1.06339	2.70448	17.7615	4.79626	0.000116511	0.000172655	0.384604	12	up	3.76282
WG24352	TvsM	complete	1.16597	0.716113	1.61583	20.0199	5.50731	5.28587e-05	0.000174712	1.44582	12	up	3.75768
WG25650	TvsR	MNAR	1.81557	1.08304	2.54809	18.7563	5.33232	0.00011806	0.000174716	1.13934	7	up	3.75767
WG13397	TvsM	complete	1.08326	0.672519	1.49399	18.9528	5.6364	5.3026e-05	0.000174897	1.49301	12	up	3.75722
WG00682	TvsM	complete	1.17245	0.72765	1.61725	19.2665	5.63332	5.33236e-05	0.00017551	1.48725	12	up	3.7557
WG07594	MvsR	MNAR	1.68	1.02489	2.33511	18.1222	5.48061	7.05016e-05	0.000176827	1.84098	7	up	3.75245
WG30674	TvsM	complete	1.28108	0.792969	1.7692	18.6381	5.60906	5.57308e-05	0.00018153	1.44176	12	up	3.74105
WG15293	MvsR	complete	1.47343	0.856049	2.09082	20.5724	4.98559	7.5688e-05	0.000188522	1.18196	12	up	3.72464
WG18684	MvsR	MAR	1.44963	0.846247	2.05302	21.3496	5.03667	7.84862e-05	0.000194595	1.21504	11	up	3.71087
WG02313	MvsR	MNAR	1.33581	0.809122	1.8625	20.2514	5.42031	7.87882e-05	0.000194897	1.7322	7	up	3.71019
WG23075	TvsR	MAR	-1.06652	-1.53278	-0.600263	19.0085	-4.79538	0.000133781	0.000197188	0.3189	11	down	3.70512
WG01248	TvsM	complete	1.3085	0.774154	1.84284	19.78	5.13374	6.34266e-05	0.000201171	1.14146	12	up	3.69643
WG26422	TvsM	MAR	1.24716	0.774782	1.71954	18.7271	5.68011	6.42827e-05	0.000203066	1.39309	11	up	3.69236
WG30876	TvsM	complete	1.44502	0.847011	2.04302	21.9861	5.04787	6.57168e-05	0.000206781	1.07429	12	up	3.68449
WG13155	TvsM	complete	1.08956	0.667209	1.51192	18.447	5.51327	6.63966e-05	0.000207655	1.26142	12	up	3.68266
WG12870	MvsR	complete	2.39138	1.37965	3.40312	21.3686	4.93769	8.43939e-05	0.000207773	1.07279	12	up	3.68241
WG16561	TvsM	complete	1.28078	0.767548	1.794	21.1033	5.27592	6.73784e-05	0.000210194	1.15357	12	up	3.67738
WG03139	TvsR	MAR	1.42779	0.805573	2.05001	19.8608	4.82972	0.000143729	0.000211007	0.337491	10	up	3.6757
WG25624	TvsM	complete	1.22783	0.722829	1.73283	19.6518	5.09713	6.87257e-05	0.00021324	1.06022	12	up	3.67113
WG10080	TvsM	MAR	1.63096	1.02245	2.23947	20.2338	5.81128	6.96095e-05	0.000214709	1.42976	10	up	3.66815
WG00519	MvsR	MNAR	1.80237	1.08408	2.52066	19.8359	5.36265	8.76607e-05	0.000214878	1.62771	7	up	3.66781
WG12100	TvsR	MNAR	3.10418	1.79796	4.4104	20.7161	5.07885	0.000149165	0.000218696	0.854388	7	up	3.66016
WG30123	TvsM	MAR	1.08754	0.671091	1.50399	18.9	5.61836	7.15224e-05	0.000219618	1.28275	11	up	3.65833
WG24571	TvsR	MNAR	-1.61952	-2.30169	-0.937353	20.1256	-5.07374	0.000150614	0.000220527	0.844628	7	down	3.65654
WG30666	TvsM	MAR	1.28301	0.781381	1.78464	18.1647	5.46616	7.24007e-05	0.000220717	1.21463	11	up	3.65616
WG06838	TvsM	complete	1.26633	0.737055	1.7956	21.2046	4.99812	7.35652e-05	0.000223233	0.960462	12	up	3.65124
WG16160	TvsR	MNAR	1.82785	1.08481	2.57089	20.0147	5.33367	0.000152862	0.000223523	0.931726	7	up	3.65068
WG27308	TvsM	complete	1.23614	0.719095	1.75318	21.599	4.99439	7.41907e-05	0.00022396	0.951921	12	up	3.64983
WG02193	TvsM	complete	1.16108	0.685026	1.63712	21.1	5.13345	7.51644e-05	0.000226069	1.0038	12	up	3.64576
WG28964	TvsR	complete	2.19255	1.22041	3.16468	20.1644	4.72827	0.000155308	0.000226799	0.123756	12	up	3.64436
WG10204	TvsM	MAR	1.07683	0.681944	1.47171	19.2799	5.96704	7.64565e-05	0.000228641	1.4377	9	up	3.64085
WG09603	TvsM	complete	1.29745	0.770471	1.82442	19.3391	5.20517	7.77956e-05	0.000231324	1.00697	12	up	3.63578
WG14815	TvsR	complete	1.06024	0.584123	1.53636	20.8947	4.6519	0.000162166	0.000236501	0.0516753	12	up	3.62617
WG10425	TvsM	complete	1.13058	0.662985	1.59817	19.4831	5.08902	8.2593e-05	0.000244201	0.908113	12	up	3.61225
WG18133	TvsR	complete	1.04551	0.573265	1.51776	19.8801	4.62489	0.000172539	0.000250966	-0.0106842	12	up	3.60039
WG31441	MvsR	MAR	1.9326	1.1345	2.7307	20.686	5.14533	0.000106767	0.000258777	1.04828	10	up	3.58707
WG14643	TvsR	MAR	1.00363	0.55695	1.4503	19.6283	4.72911	0.000178503	0.000258958	0.118271	10	up	3.58677
WG23783	TvsM	complete	1.76886	1.06245	2.47527	19.6172	5.35143	8.95052e-05	0.00026266	0.954141	12	up	3.58061
WG11963	MvsR	MAR	1.42232	0.811973	2.03267	19.9603	4.8854	0.000109579	0.000265	0.880078	11	up	3.57675
WG32196	TvsM	complete	1.05733	0.634451	1.48021	19.7095	5.34353	9.08275e-05	0.000265054	0.939061	12	up	3.57667
WG02621	TvsR	MNAR	2.49017	1.45625	3.52409	20.9111	5.22201	0.000184571	0.000267411	0.739635	7	up	3.57282
WG28582	TvsR	MNAR	1.80596	1.02758	2.58434	19.1068	4.95851	0.000187458	0.000271236	0.623698	7	up	3.56665
WG25420	TvsM	MAR	1.59707	0.981342	2.2128	18.1215	5.62383	9.4428e-05	0.000271524	1.11336	10	up	3.56619
WG06332	MvsR	MAR	1.8192	1.05342	2.58498	17.9107	5.02243	0.000113075	0.000271631	0.998082	9	up	3.56602
WG12453	TvsM	MAR	1.23325	0.747001	1.71949	19.5632	5.45657	9.48318e-05	0.000272186	0.991309	11	up	3.56513
WG32417	TvsM	MAR	1.45456	0.89335	2.01577	19.2386	5.61956	9.50908e-05	0.000272432	1.10611	10	up	3.56474
WG16408	TvsM	MAR	1.11763	0.672805	1.56245	19.4314	5.4055	0.000103742	0.000293467	0.898598	11	up	3.53244
WG22157	TvsM	complete	1.06653	0.606358	1.5267	20.7867	4.84167	0.000105035	0.000296059	0.601549	12	up	3.52862
WG29609	TvsR	complete	1.4126	0.7632	2.06201	19.6757	4.54409	0.000207757	0.00029904	-0.197355	12	up	3.52427
WG26809	TvsM	complete	1.10695	0.657033	1.55686	20.3289	5.25813	0.000106489	0.000299082	0.775554	12	up	3.52421
WG22177	TvsR	MNAR	1.56825	0.884647	2.25185	19.7416	4.90282	0.000208492	0.000299707	0.51639	7	up	3.5233
WG05476	TvsM	MAR	1.1357	0.682079	1.58932	21.094	5.38635	0.000107303	0.000300296	0.863757	11	up	3.52245
WG10005	TvsM	MAR	1.0339	0.620765	1.44704	19.9636	5.38405	0.00010774	0.000300981	0.859567	11	up	3.52146
WG16617	TvsM	complete	1.44346	0.854393	2.03254	18.542	5.23688	0.000110805	0.000307358	0.734726	12	up	3.51236
WG05516	TvsR	MAR	1.62549	0.904913	2.34607	19.8525	4.79327	0.000214786	0.000307952	-0.0152851	10	up	3.51152
WG22969	MvsR	complete	1.02434	0.573145	1.47554	23.0991	4.74263	0.000131718	0.000312253	0.626997	12	up	3.50549
WG03184	MvsR	complete	1.05437	0.588404	1.52034	19.8373	4.72693	0.00013654	0.000320869	0.591035	12	up	3.49367
WG28070	TvsR	MNAR	1.43832	0.840811	2.03582	19.2717	5.26736	0.000225329	0.000322232	0.597298	7	up	3.49183
WG27132	MvsR	complete	-1.0718	-1.54589	-0.597704	20.7371	-4.7227	0.000137869	0.00032329	0.581345	12	down	3.49041
WG01082	MvsR	MNAR	2.17834	1.26718	3.0895	19.2853	5.10935	0.000140814	0.000329156	1.16336	7	up	3.4826
WG20351	TvsR	complete	-1.34001	-1.96234	-0.717676	19.4285	-4.49807	0.000230975	0.000329879	-0.303718	12	down	3.48165
WG10241	MvsR	complete	1.02101	0.567755	1.47426	19.5918	4.70577	0.000143321	0.000333182	0.542568	12	up	3.47732
WG11081	TvsR	complete	1.22163	0.653485	1.78977	19.2648	4.49182	0.000234327	0.000334234	-0.318181	12	up	3.47595
WG17122	MvsR	MNAR	1.42768	0.826051	2.02931	19.6513	5.0715	0.000151254	0.000347885	1.09327	7	up	3.45856
WG01404	TvsM	complete	1.05833	0.618746	1.49791	20.2494	5.14533	0.000131578	0.000353729	0.558275	12	up	3.45133
WG26243	TvsM	MAR	1.10026	0.64307	1.55745	18.7619	5.14321	0.000132106	0.000354268	0.597073	11	up	3.45067
WG05108	TvsR	MAR	1.31706	0.731757	1.90236	18.7443	4.80906	0.000249586	0.000354624	-0.106825	10	up	3.45023
WG23302	TvsM	MNAR	2.03263	1.2898	2.77546	20.036	6.13567	0.000133746	0.000357112	1.36518	7	up	3.4472
WG19046	TvsM	complete	1.22316	0.68786	1.75846	20.4544	4.79033	0.00013529	0.000359908	0.375703	12	up	3.44381
WG14706	TvsR	MNAR	1.71315	0.948849	2.47745	19.5534	4.79032	0.000258752	0.000367176	0.298602	7	up	3.43513
WG01091	MvsR	complete	1.58418	0.88608	2.28227	20.3888	4.77627	0.000161247	0.000368515	0.482822	12	up	3.43354
WG09476	TvsM	MAR	1.0024	0.590035	1.41476	19.418	5.22982	0.000141669	0.000373816	0.577165	11	up	3.42734
WG14392	TvsM	MAR	1.03994	0.611473	1.46842	19.2785	5.22171	0.000143736	0.000378634	0.618795	10	up	3.42178
WG16107	TvsR	complete	1.49315	0.789531	2.19676	19.8593	4.43311	0.000268281	0.000380208	-0.453914	12	up	3.41998
WG13549	TvsR	MNAR	2.37581	1.36736	3.38427	18.6065	5.15509	0.000269732	0.000381775	0.413117	7	up	3.41819
WG14993	TvsM	MAR	1.17923	0.702126	1.65634	19.1954	5.35898	0.000146505	0.000385281	0.65817	10	up	3.41422
WG08716	TvsR	MAR	1.3173	0.705007	1.9296	18.014	4.52819	0.000275851	0.000389436	-0.321234	10	up	3.40956
WG14055	TvsM	MAR	1.1555	0.644465	1.66653	17.7517	4.74024	0.000151226	0.000395934	0.307034	11	up	3.40238
WG20579	TvsM	MAR	1.26152	0.747289	1.77575	20.5544	5.31905	0.000156667	0.000408585	0.570866	10	up	3.38872
WG19803	MvsR	complete	-1.33381	-1.93893	-0.728689	19.683	-4.60461	0.00018077	0.000411394	0.310604	12	down	3.38574
WG03674	TvsM	MAR	1.17175	0.683296	1.6602	18.6151	5.16105	0.000160231	0.000416493	0.450276	11	up	3.38039
WG27637	TvsM	MNAR	1.61029	1.00768	2.21289	21.4149	5.99188	0.000160726	0.00041709	1.17701	7	up	3.37977
WG11727	TvsM	complete	1.07553	0.618197	1.53286	19.8821	5.02604	0.000164861	0.000425011	0.326927	12	up	3.3716
WG06433	TvsM	complete	1.25131	0.704267	1.79835	19.5832	4.83593	0.000166248	0.000427309	0.234255	12	up	3.36926
WG04960	MvsR	MAR	2.0558	1.14431	2.96729	18.3101	4.76833	0.000191347	0.000433639	0.469353	9	up	3.36287
WG18371	MvsR	complete	2.26404	1.2296	3.29849	20.2689	4.57213	0.000194779	0.000439573	0.236085	12	up	3.35697
WG29061	TvsM	complete	1.18947	0.66713	1.71181	19.5042	4.81433	0.00017388	0.000443889	0.188679	12	up	3.35273
WG18692	TvsM	complete	1.44047	0.791126	2.08982	21.9145	4.6506	0.000184656	0.0004646	0.062146	12	up	3.33292
WG15893	TvsM	MAR	1.25043	0.720533	1.78032	18.3082	5.07684	0.000186459	0.000467637	0.294139	11	up	3.33009
WG27086	TvsM	complete	1.26144	0.687322	1.83555	19.7014	4.58996	0.000186959	0.000468142	0.0219014	12	up	3.32962
WG30995	TvsM	complete	1.67591	0.943171	2.40865	18.15	4.85992	0.000187959	0.000469898	0.148488	12	up	3.328
WG05922	TvsR	complete	1.10814	0.573955	1.64232	20.5685	4.33357	0.000337566	0.000474743	-0.684053	12	up	3.32354
WG03270	TvsM	complete	1.67669	0.92412	2.42926	21.4588	4.68928	0.000194537	0.000483265	0.040383	12	up	3.31582
WG31506	MvsR	MNAR	1.32454	0.74431	1.90478	20.6464	4.87862	0.00021838	0.000485869	0.733266	7	up	3.31348
WG22557	MvsR	complete	-1.17079	-1.68435	-0.657231	20.1007	-4.87217	0.000221095	0.000489946	0.27741	12	down	3.30985
WG29741	TvsM	complete	1.37575	0.769251	1.98224	20.1517	4.81991	0.000203622	0.000502788	0.0669122	12	up	3.29861
WG05537	TvsM	complete	1.13663	0.642238	1.63102	19.8253	4.9134	0.000204318	0.000502788	0.107041	12	up	3.29861
WG25371	TvsM	complete	1.10024	0.620376	1.58011	18.886	4.90007	0.000209595	0.000509161	0.0809276	12	up	3.29314
WG27111	TvsR	complete	-1.22254	-1.81638	-0.628701	21.6597	-4.30067	0.000364225	0.000511583	-0.760113	12	down	3.29108
WG12615	TvsM	MAR	1.01501	0.578755	1.45126	19.3208	5.0056	0.00021213	0.000513166	0.161382	11	up	3.28974
WG02000	TvsM	MAR	1.06711	0.606647	1.52756	19.2605	4.98589	0.000219864	0.000530241	0.12454	11	up	3.27553
WG31441	TvsM	MAR	-1.89745	-2.74396	-1.05093	20.686	-4.76283	0.000228319	0.000548944	0.0860764	9	down	3.26047
WG01926	TvsM	complete	1.25957	0.684032	1.83511	20.9278	4.60625	0.000232846	0.000557285	-0.141152	12	up	3.25392
WG11359	TvsR	complete	1.0292	0.52458	1.53381	20.9528	4.26067	0.0003995	0.000558996	-0.852555	12	up	3.25259
WG24027	TvsM	MNAR	1.50197	0.911556	2.09238	19.5291	5.70426	0.00023406	0.000559322	0.79157	7	up	3.25234
WG12539	TvsR	MAR	-1.25294	-1.85958	-0.646298	19.2521	-4.34708	0.000409417	0.000571424	-0.778747	11	down	3.24304
WG01812	TvsM	MAR	1.21187	0.682007	1.74174	20.3805	4.92058	0.000247644	0.000589987	0.00218415	11	up	3.22916
WG22355	TvsM	MAR	1.14378	0.661916	1.62565	19.0292	5.19394	0.000253406	0.000600978	0.189705	9	up	3.22114
WG28719	TvsM	complete	1.09568	0.600537	1.59083	19.1669	4.70197	0.000258058	0.000611088	-0.174335	12	up	3.2139
WG07681	TvsM	MAR	1.21213	0.677486	1.74677	19.8887	4.87765	0.000267877	0.00062959	-0.078532	11	up	3.20094
WG19629	MvsR	complete	1.17054	0.614619	1.72646	20.359	4.39861	0.000290503	0.000633133	-0.162454	12	up	3.1985
WG23258	MvsR	MAR	1.04705	0.553428	1.54068	19.3248	4.44684	0.000291354	0.00063371	-0.0982999	11	up	3.19811
WG31174	TvsM	complete	1.05114	0.568076	1.53421	19.5077	4.60034	0.000271886	0.000638059	-0.26456	12	up	3.19514
WG10083	MvsR	complete	1.25677	0.65829	1.85525	20.3351	4.38679	0.000298532	0.000645426	-0.189596	12	up	3.19015
WG32442	MvsR	MAR	-1.2252	-1.80514	-0.645248	21.3175	-4.42891	0.000303324	0.000654477	-0.138465	11	down	3.18411
WG12576	MvsR	complete	1.36462	0.712532	2.01671	20.0521	4.37166	0.000309145	0.000664386	-0.22437	12	up	3.17758
WG17336	TvsM	complete	1.20287	0.632447	1.77329	20.4939	4.40519	0.000286126	0.000666496	-0.404578	12	up	3.1762
WG13749	TvsM	complete	1.05167	0.555241	1.5481	20.0258	4.44122	0.000295055	0.000683239	-0.409113	12	up	3.16543
WG31674	TvsM	MAR	1.0695	0.589832	1.54917	17.1838	4.79695	0.000310674	0.000708951	-0.23077	11	up	3.14938
WG11081	TvsM	complete	1.18787	0.619727	1.75602	19.2648	4.36769	0.000311991	0.000710871	-0.491159	12	up	3.14821
WG00245	TvsR	MAR	1.16549	0.618506	1.71247	16.6017	4.61988	0.000525167	0.000726547	-0.735337	9	up	3.13874
WG11127	TvsM	complete	1.01743	0.52805	1.50681	20.3289	4.3431	0.000330219	0.000741693	-0.547935	12	up	3.12978
WG16713	TvsM	complete	1.15102	0.610159	1.69187	20.6135	4.49919	0.00033635	0.000751166	-0.479833	12	up	3.12426
WG20068	MvsR	MAR	1.56355	0.810387	2.31671	20.5717	4.35215	0.000360429	0.000762814	-0.310426	11	up	3.11758
WG12552	MvsR	MAR	1.53801	0.80317	2.27285	20.6584	4.40522	0.00036059	0.000762814	-0.22855	10	up	3.11758
WG06777	MvsR	complete	-1.25146	-1.8444	-0.658526	21.3068	-4.46215	0.000363673	0.000767833	-0.302394	12	down	3.11473
WG27646	MvsR	complete	1.81443	0.93138	2.69748	19.6091	4.29236	0.000371285	0.000780855	-0.406553	12	up	3.10743
WG24203	MvsR	MAR	1.34946	0.695667	2.00325	19.1432	4.32713	0.000381297	0.000800353	-0.36649	11	up	3.09672
WG00234	MvsR	MAR	-1.21949	-1.81043	-0.628546	20.6205	-4.32626	0.000382049	0.000800377	-0.368452	11	down	3.09671
WG19934	MvsR	complete	-1.48635	-2.17916	-0.79355	19.9917	-4.58508	0.000385153	0.000803765	-0.286268	12	down	3.09487
WG24101	TvsR	complete	1.01306	0.496457	1.52966	20.746	4.09657	0.000583976	0.000804881	-1.23148	12	up	3.09427
WG05768	TvsM	MNAR	1.5017	0.873227	2.13017	19.558	5.35785	0.000373693	0.000824014	0.311078	7	up	3.08407
WG13125	TvsR	MNAR	1.31819	0.680047	1.95634	18.9679	4.4441	0.000599512	0.000824236	-0.505707	7	up	3.08395
WG02905	TvsM	MAR	1.48818	0.817158	2.1592	20.4195	4.80858	0.000376468	0.000828968	-0.317069	10	up	3.08146
WG10084	TvsM	complete	1.31246	0.672339	1.95259	20.3741	4.28316	0.000379267	0.000833005	-0.68631	12	up	3.07935
WG23458	TvsM	MAR	1.11403	0.609625	1.61843	18.9618	4.78867	0.00038984	0.000853624	-0.353045	10	up	3.06873
WG01783	TvsM	complete	1.31639	0.70176	1.93102	21.8899	4.57725	0.000391076	0.000855139	-0.556574	12	up	3.06796
WG20073	TvsR	MNAR	1.7086	0.903145	2.51406	20.6148	4.64172	0.000627829	0.000861023	-0.450824	7	up	3.06499
WG00012	TvsM	MNAR	1.32256	0.76115	1.88397	19.6964	5.28237	0.000414728	0.000896863	0.204003	7	up	3.04727
WG03181	TvsM	MNAR	1.35484	0.77612	1.93355	19.7998	5.24947	0.000434106	0.000934905	0.157065	7	up	3.02923
WG28013	TvsM	complete	1.1783	0.594992	1.7616	20.5643	4.21988	0.000439023	0.000941621	-0.832347	12	up	3.02612
WG12539	TvsM	MAR	-1.29427	-1.92789	-0.660651	19.2521	-4.2993	0.000454528	0.000967411	-0.730243	10	down	3.01439
WG26015	MvsR	complete	1.0604	0.529854	1.59094	21.7072	4.17531	0.000486697	0.000992678	-0.675341	12	up	3.00319
WG05944	TvsR	MNAR	2.04284	1.01611	3.06958	19.4303	4.25218	0.000741165	0.00101394	-0.759347	7	up	2.99399
WG15712	TvsM	complete	1.15561	0.586594	1.72462	20.2001	4.27454	0.000479849	0.00101395	-0.86917	12	up	2.99398
WG09508	TvsM	complete	1.0377	0.522627	1.55277	18.4386	4.22362	0.000481415	0.00101589	-0.899735	12	up	2.99315
WG26312	TvsM	complete	1.06185	0.533512	1.59019	18.6816	4.21339	0.000492642	0.00103359	-0.922793	12	up	2.98565
WG21998	TvsM	complete	1.12384	0.585195	1.66249	19.5275	4.45897	0.0004929	0.00103359	-0.792414	12	up	2.98565
WG08297	TvsR	MAR	1.5429	0.744046	2.34176	19.7028	4.06509	0.000759891	0.0010357	-1.3995	11	up	2.98476
WG17350	TvsM	complete	1.6085	0.809147	2.40786	21.8075	4.23528	0.000522954	0.00108603	-0.955518	12	up	2.96416
WG31689	MvsR	MAR	-1.74362	-2.61374	-0.873494	20.0709	-4.21766	0.000543547	0.00109418	-0.637554	10	down	2.96091
WG06107	TvsM	complete	1.10339	0.550248	1.65654	19.6001	4.18188	0.000528923	0.00109697	-0.993835	12	up	2.9598
WG14394	MvsR	complete	1.07132	0.528205	1.61443	20.6222	4.12068	0.000552275	0.00110968	-0.800674	12	up	2.9548
WG19434	MvsR	MAR	-1.86373	-2.79014	-0.937325	19.5975	-4.25322	0.000566139	0.00113333	-0.649267	10	down	2.94565
WG15537	MvsR	MNAR	1.22828	0.629987	1.82658	20.4418	4.3875	0.00056727	0.00113349	-0.202007	7	up	2.94558
WG29316	TvsM	MAR	2.52029	1.31088	3.72969	16.5675	4.48336	0.000556829	0.00114878	-0.770292	10	up	2.93976
WG30353	MvsR	complete	1.18458	0.577076	1.79209	20.124	4.07338	0.000616169	0.00122627	-0.909119	12	up	2.91141
WG14275	TvsR	MAR	1.54608	0.728679	2.36349	19.9582	3.98104	0.000914224	0.00123993	-1.52392	10	up	2.9066
WG27610	MvsR	complete	1.22018	0.59334	1.84702	20.4184	4.06639	0.000626215	0.00124209	-0.925132	12	up	2.90585
WG06645	TvsR	complete	1.54491	0.717049	2.37278	21.1925	3.8984	0.000923787	0.00125136	-1.68751	12	up	2.90262
WG11505	TvsM	complete	1.05631	0.514861	1.59777	20.3865	4.07543	0.000613247	0.00125364	-1.16528	12	up	2.90183
WG31689	TvsM	complete	1.5335	0.755237	2.31176	20.0709	4.14723	0.000634386	0.00129014	-1.14918	12	up	2.88936
WG28720	MvsR	complete	1.00373	0.485671	1.5218	18.3908	4.04742	0.000654334	0.00129312	-0.968608	12	up	2.88836
WG13498	TvsM	MNAR	1.68996	0.928528	2.45138	19.945	4.97669	0.000637702	0.0012952	-0.238304	7	up	2.88766
WG02180	TvsM	complete	1.59052	0.769974	2.41107	17.7615	4.04927	0.000651528	0.00131987	-1.2255	12	up	2.87947
WG32030	TvsR	MNAR	1.71341	0.822021	2.60479	19.61	4.10799	0.000987246	0.00132917	-1.04636	7	up	2.87642
WG10425	MvsR	MAR	1.02081	0.498024	1.54359	19.4831	4.10982	0.000688732	0.00135861	-0.872944	10	up	2.8669
WG22160	MvsR	MAR	1.15468	0.558534	1.75083	20.5208	4.06058	0.000695498	0.00136697	-0.963768	11	up	2.86424
WG18436	TvsR	MAR	1.96579	0.907062	3.02453	21.1711	3.89253	0.00101668	0.00136713	-1.71501	11	up	2.86419
WG14328	TvsR	MNAR	1.85177	0.882019	2.82152	19.316	4.08095	0.00104197	0.00139943	-1.1003	7	up	2.85405
WG32640	TvsR	MNAR	1.4692	0.757784	2.18061	18.9803	4.63075	0.00105472	0.00141484	-0.847518	7	up	2.84929
WG00776	MvsR	MAR	1.4982	0.724011	2.27239	19.0811	4.07308	0.000746646	0.00145954	-0.953121	10	up	2.83578
WG29171	TvsM	complete	1.33822	0.663908	2.01253	18.9705	4.24131	0.00075731	0.00151077	-1.229	12	up	2.8208
WG17471	TvsM	MAR	1.52225	0.77182	2.27267	19.7736	4.39819	0.000780962	0.001554	-1.06745	10	up	2.80855
WG16533	MvsR	MNAR	1.14442	0.562993	1.72585	19.8377	4.20653	0.000811425	0.00157446	-0.552176	7	up	2.80287
WG27569	MvsR	MAR	1.01537	0.482233	1.5485	20.1219	4.00855	0.000860528	0.00166147	-1.09396	10	up	2.77951
WG02996	TvsR	MNAR	1.7864	0.829955	2.74285	20.2439	3.99165	0.00124566	0.00166692	-1.27864	7	up	2.77808
WG27181	MvsR	complete	-1.01222	-1.55086	-0.47358	21.4596	-3.9257	0.000867242	0.0016711	-1.24704	12	down	2.777
WG12905	TvsM	complete	1.2329	0.591256	1.87455	19.6742	4.06227	0.000850422	0.00167524	-1.41429	12	up	2.77592
WG04960	TvsM	MAR	1.57324	0.750467	2.39601	18.3101	4.04251	0.000887104	0.00174094	-1.41198	11	up	2.75922
WG09353	MvsR	MNAR	1.44707	0.700491	2.19365	20.44	4.14236	0.000921894	0.00176072	-0.676919	7	up	2.75431
WG08802	TvsR	MAR	-1.16296	-1.80777	-0.518161	19.1539	-3.79612	0.00137386	0.00183403	-1.92977	10	down	2.73659
WG16271	TvsR	MAR	1.46951	0.652054	2.28696	19.5776	3.78363	0.00141218	0.00188291	-1.95712	10	up	2.72517
WG25838	TvsR	complete	1.18862	0.519371	1.85788	19.3006	3.71019	0.00142714	0.00190056	-2.11805	12	up	2.72112
WG12100	TvsM	complete	1.34276	0.644561	2.04097	20.7161	4.1101	0.000983102	0.00190104	-1.49348	12	up	2.72101
WG16264	TvsM	MAR	1.17398	0.585956	1.76201	20.7319	4.36862	0.000998453	0.00192813	-1.2302	9	up	2.71486
WG07705	TvsM	MAR	1.2309	0.596433	1.86536	19.212	4.17388	0.00100118	0.00193103	-1.42727	11	up	2.71421
WG31177	TvsM	MAR	1.07317	0.508079	1.63826	19.707	4.03533	0.00100899	0.00194131	-1.51017	11	up	2.7119
WG23437	TvsR	MNAR	1.12908	0.533532	1.72464	20.4183	4.14846	0.00146134	0.00194142	-1.31142	7	up	2.71188
WG25130	MvsR	complete	-1.6383	-2.49709	-0.779514	19.9199	-4.07701	0.00105018	0.00197778	-1.29977	12	down	2.70382
WG04637	TvsM	MAR	1.58732	0.764845	2.40979	18.9265	4.1521	0.00104376	0.00198872	-1.46964	11	up	2.70143
WG03354	TvsM	MNAR	1.69055	0.870801	2.5103	17.4845	4.62425	0.00106492	0.00201679	-0.765363	7	up	2.69534
WG15245	TvsM	MNAR	1.61165	0.829108	2.39419	20.6631	4.61804	0.00107476	0.00203054	-0.774819	7	up	2.69239
WG01927	TvsM	MAR	1.14582	0.549145	1.74249	18.3617	4.13147	0.0010858	0.00204401	-1.5098	11	up	2.68952
WG00234	TvsM	MAR	1.08726	0.496314	1.6782	20.6205	3.85715	0.0011013	0.00206824	-1.67951	11	up	2.6844
WG06645	MvsR	complete	1.48952	0.661657	2.31739	21.1925	3.75862	0.00127615	0.00236218	-1.62763	12	up	2.62669
WG20351	TvsM	complete	-1.11421	-1.73654	-0.491879	19.4285	-3.74013	0.00133184	0.0024456	-1.93389	12	down	2.61162
WG08158	TvsR	MNAR	1.2401	0.538746	1.94145	20.5681	3.77881	0.00191036	0.00250777	-1.70458	7	up	2.60071
WG11333	TvsM	MAR	1.13363	0.522876	1.74439	20.5484	3.99328	0.00141601	0.00256837	-1.77946	11	up	2.59034
WG19371	TvsM	complete	1.07659	0.470893	1.68229	20.2286	3.7131	0.00141758	0.00256837	-1.99545	12	up	2.59034
WG07086	TvsR	MNAR	1.65311	0.773855	2.53236	18.0963	4.21582	0.00197273	0.00258658	-1.49484	7	up	2.58727
WG22389	TvsM	MNAR	1.65455	0.807969	2.50114	20.4346	4.38232	0.00152995	0.00275145	-1.13741	7	up	2.56044
WG29175	TvsR	MNAR	-1.13683	-1.78837	-0.485281	20.1241	-3.72893	0.00211246	0.00276322	-1.80447	7	down	2.55859
WG28964	MvsR	MAR	1.80636	0.78677	2.82594	20.1644	3.71416	0.00152111	0.00276821	-1.73674	11	up	2.5578
WG09693	TvsR	MAR	1.15172	0.501122	1.80231	20.736	3.83824	0.00218059	0.00284895	-2.22969	10	up	2.54531
WG17430	TvsM	complete	1.01449	0.43424	1.59474	20.9817	3.65236	0.00163074	0.0028995	-2.13351	12	up	2.53768
WG02325	TvsM	complete	1.02894	0.446104	1.61178	19.4827	3.71573	0.00164007	0.0029128	-2.09635	12	up	2.53569
WG12344	TvsR	complete	2.05254	0.830527	3.27456	22.1737	3.50878	0.00226902	0.002961	-2.57461	12	up	2.52856
WG08289	TvsM	complete	1.24133	0.547801	1.93486	20.5155	3.82522	0.00173989	0.00306925	-2.06972	12	up	2.51297
WG13624	TvsM	complete	1.36175	0.58353	2.13998	21.0738	3.68294	0.00176291	0.00309616	-2.16797	12	up	2.50918
WG12144	TvsM	MNAR	1.15479	0.551081	1.75851	19.89	4.28912	0.00176304	0.00309616	-1.28287	7	up	2.50918
WG21558	TvsR	MAR	1.42657	0.578647	2.2745	18.693	3.54109	0.00240893	0.00313616	-2.48623	10	up	2.5036
WG09249	TvsR	MNAR	-1.31145	-2.08121	-0.541699	20.2234	-3.64112	0.00252218	0.00327586	-1.9803	7	down	2.48467
WG17192	TvsM	MNAR	1.3784	0.648754	2.10804	19.1698	4.23602	0.00191243	0.00333242	-1.36625	7	up	2.47724
WG18103	TvsM	complete	1.10755	0.475501	1.7396	19.611	3.72342	0.00192908	0.00335772	-2.20499	12	up	2.47396
WG05113	MvsR	complete	-1.05925	-1.68162	-0.436891	22.6166	-3.55548	0.00203821	0.00361147	-2.08682	12	down	2.44232
WG10083	TvsM	complete	1.01515	0.416671	1.61363	20.3351	3.54342	0.0020955	0.00362328	-2.38005	12	up	2.4409
WG27860	MvsR	MNAR	1.34567	0.574454	2.11689	19.606	3.72903	0.00211201	0.00371326	-1.48487	7	up	2.43024
WG03221	MvsR	MNAR	2.02987	0.86649	3.19324	21.9732	3.72891	0.00211254	0.00371326	-1.48512	7	up	2.43024
WG29898	MvsR	MNAR	1.44651	0.604904	2.28811	19.444	3.67322	0.00236381	0.00414146	-1.59428	7	up	2.38285
WG17687	TvsR	complete	1.07955	0.40668	1.75241	20.7407	3.35162	0.00325158	0.00418874	-2.92692	12	up	2.37792
WG27646	TvsR	complete	1.40379	0.520737	2.28684	19.6091	3.32091	0.00348742	0.00448731	-2.99526	12	up	2.34801
WG23509	TvsR	MNAR	1.48752	0.572766	2.40227	19.2957	3.47531	0.00352714	0.00453313	-2.31187	7	up	2.3436
WG19434	TvsR	MAR	-1.39433	-2.26338	-0.525287	19.5975	-3.39203	0.00357577	0.00459029	-2.91469	11	down	2.33816
WG18363	TvsM	complete	1.21878	0.489959	1.9476	20.6908	3.55331	0.00275032	0.00462313	-2.55866	12	up	2.33506
WG23019	TvsR	MAR	1.02437	0.37656	1.67218	20.0674	3.31505	0.0037304	0.00477768	-2.99749	11	up	2.32078
WG28582	MvsR	MNAR	1.30727	0.528888	2.08564	19.1068	3.58928	0.00280077	0.00481341	-1.75882	7	up	2.31755
WG21541	TvsM	complete	1.52841	0.590174	2.46664	20.2444	3.40306	0.00289105	0.00484413	-2.69527	12	up	2.31478
WG05790	TvsM	complete	3.13059	1.2084	5.05279	22.1284	3.40229	0.00289617	0.00484754	-2.697	12	up	2.31448
WG08294	TvsM	complete	1.32267	0.530127	2.1152	19.6814	3.56668	0.00293177	0.00490189	-2.59306	12	up	2.30964
WG05324	TvsM	MNAR	1.3516	0.576398	2.12681	18.5255	3.90955	0.00318007	0.00525952	-1.88661	7	up	2.27905
WG13755	TvsM	MNAR	1.45071	0.617056	2.28435	19.9006	3.90202	0.00321811	0.00531276	-1.89876	7	up	2.27468
WG15002	TvsR	MNAR	1.15366	0.42691	1.8804	19.2152	3.39257	0.0041703	0.00532256	-2.47691	7	up	2.27388
WG23428	MvsR	complete	3.25743	1.23301	5.28185	22.2831	3.36137	0.00318	0.00537963	-2.52053	12	up	2.26925
WG05999	TvsR	complete	1.21504	0.427885	2.0022	20.1046	3.22457	0.00434135	0.00552809	-3.20854	12	up	2.25742
WG08289	TvsR	MNAR	2.01771	0.720231	3.31519	20.5155	3.32348	0.00479636	0.00605855	-2.61441	7	up	2.21763
WG03820	MvsR	complete	3.28569	1.20108	5.3703	22.0625	3.29263	0.00371944	0.00620481	-2.67265	12	up	2.20727
WG01091	TvsM	MAR	-1.2246	-2.0051	-0.444103	20.3888	-3.30236	0.00406668	0.00654169	-2.88539	10	down	2.18431
WG20068	TvsM	complete	1.11754	0.39943	1.83565	20.5717	3.26251	0.00419444	0.00673341	-3.04099	12	up	2.17176
WG28372	MvsR	MNAR	1.0318	0.383493	1.68011	19.1733	3.40133	0.00409697	0.00677191	-2.12674	7	up	2.16929
WG09688	TvsR	MAR	1.74298	0.581297	2.90466	20.3358	3.14547	0.00544102	0.00686501	-3.36533	11	up	2.16336
WG17401	TvsR	MAR	1.75212	0.585345	2.9189	23.6887	3.16065	0.00553903	0.00696479	-3.30319	10	up	2.15709
WG11479	MvsR	MAR	1.24507	0.446833	2.0433	20.0754	3.28294	0.004243	0.00698125	-2.66231	10	up	2.15607
WG07681	TvsR	MNAR	1.45784	0.504161	2.41151	19.8887	3.28877	0.00558887	0.00701947	-2.73608	7	up	2.1537
WG09609	TvsR	complete	1.32671	0.430467	2.22295	20.1634	3.09237	0.00585214	0.00732513	-3.49802	12	up	2.13518
WG27161	TvsM	MAR	1.26402	0.460588	2.06746	18.8419	3.38477	0.00462996	0.00737224	-2.97225	11	up	2.1324
WG30182	TvsM	MNAR	-1.04182	-1.6785	-0.405134	17.2095	-3.66912	0.00466585	0.00741435	-2.27742	7	down	2.12993
WG03120	TvsR	MNAR	1.99916	0.709393	3.28893	19.7371	3.42921	0.00596868	0.00745968	-2.68563	7	up	2.12728
WG19522	TvsM	complete	1.05442	0.36208	1.74676	19.0297	3.20549	0.00502402	0.00787983	-3.19856	12	up	2.10348
WG26809	MvsR	MNAR	1.30493	0.463218	2.14664	20.3289	3.31328	0.00489641	0.00792368	-2.29859	7	up	2.10107
WG24875	TvsM	MAR	-1.00998	-1.66848	-0.351486	23.0308	-3.25903	0.00507878	0.00794983	-3.12035	11	down	2.09964
WG00776	TvsM	complete	-1.04895	-1.74141	-0.356497	19.0811	-3.18834	0.00521527	0.00811494	-3.23501	12	down	2.09071
WG27665	TvsR	MNAR	1.90323	0.634834	3.17162	19.1336	3.28335	0.00685314	0.00852012	-2.86855	7	up	2.06955
WG06727	TvsM	MAR	1.31992	0.457112	2.18272	18.7849	3.29123	0.00556189	0.0085862	-3.15504	11	up	2.0662
WG21634	TvsM	complete	1.20244	0.411121	1.99375	19.8638	3.24748	0.00559375	0.00861844	-3.23558	12	up	2.06457
WG30870	TvsM	MAR	1.3685	0.451351	2.28565	19.0782	3.14054	0.00578646	0.0088805	-3.29049	11	up	2.05156
WG21541	TvsR	complete	1.33743	0.399192	2.27566	20.2444	2.97783	0.0075643	0.00939369	-3.74546	12	up	2.02716
WG22424	MvsR	complete	-1.08891	-1.82564	-0.352186	21.8031	-3.08765	0.00591466	0.00941248	-3.12069	12	down	2.0263
WG19445	MvsR	complete	-1.40442	-2.35632	-0.45253	23.7132	-3.08213	0.00598848	0.00950594	-3.13262	12	down	2.022
WG28215	TvsM	complete	1.07471	0.346213	1.80321	19.1838	3.13467	0.0065762	0.00994666	-3.41995	12	up	2.00232
WG15593	TvsR	MAR	2.17483	0.62986	3.71979	20.2203	2.97606	0.00866334	0.0106745	-3.7389	10	up	1.97165
WG10521	TvsR	MAR	-1.08414	-1.85143	-0.316857	18.7383	-3.0197	0.00886036	0.0108929	-3.66087	9	down	1.96286
WG17427	TvsM	MAR	1.56134	0.502535	2.62014	21.2476	3.19727	0.00728489	0.0109134	-3.33004	10	up	1.96204
WG14328	MvsR	MNAR	1.41922	0.449467	2.38897	19.316	3.12769	0.00712638	0.0112298	-2.65898	7	up	1.94963
WG19663	TvsM	complete	1.35573	0.410601	2.30085	20.8631	3.06561	0.00807741	0.0119977	-3.59772	12	up	1.9209
WG05944	MvsR	MNAR	1.4716	0.444862	2.49833	19.4303	3.06313	0.00811794	0.0126997	-2.78357	7	up	1.89621
WG24441	TvsR	MAR	1.02985	0.269859	1.78984	18.6554	2.84084	0.010619	0.0129683	-4.01034	11	up	1.88712
WG01783	MvsR	MNAR	1.63392	0.484047	2.78379	21.8899	3.03679	0.00856043	0.0133149	-2.83425	7	up	1.87566
WG17441	TvsM	complete	1.09526	0.305061	1.88547	23.1821	2.89549	0.00908433	0.0133293	-3.80324	12	up	1.87519
WG12555	TvsR	MNAR	1.37523	0.379013	2.37144	18.1545	3.02066	0.011066	0.0134696	-3.34413	7	up	1.87065
WG08297	MvsR	MAR	1.16302	0.328645	1.9974	19.7028	2.93377	0.00904513	0.0139882	-3.41255	10	up	1.85424
WG09732	TvsM	MNAR	1.27868	0.386916	2.17043	21.4255	3.21519	0.00979481	0.0142256	-3.0281	7	up	1.84693
WG19734	TvsR	complete	1.58475	0.391904	2.77759	20.7637	2.77535	0.0118385	0.0143623	-4.17399	12	up	1.84278
WG03376	TvsM	MNAR	1.11973	0.333766	1.90568	19.8361	3.19452	0.010136	0.0146669	-3.06255	7	up	1.83366
WG16794	TvsM	complete	1.06237	0.280374	1.84437	20.5878	2.85938	0.0106072	0.0152782	-3.9225	12	up	1.81593
WG19731	TvsR	complete	1.51138	0.360688	2.66206	20.1316	2.74383	0.012684	0.0153711	-4.23957	12	up	1.81329
WG17401	MvsR	MAR	1.59885	0.432066	2.76562	23.6887	2.88415	0.01006	0.0154472	-3.49541	10	up	1.81115
WG30350	TvsR	MNAR	2.42599	0.606492	4.24549	20.0475	2.89091	0.0130178	0.0157411	-3.53578	7	up	1.80296
WG32467	MvsR	MAR	1.13097	0.306655	1.95529	18.4646	2.91532	0.0103464	0.0158645	-3.40245	8	up	1.79957
WG12344	TvsM	complete	1.61447	0.392451	2.83649	22.1737	2.7599	0.0122459	0.0174307	-4.08794	12	up	1.75869
WG16271	MvsR	MAR	1.09573	0.278272	1.91318	19.5776	2.82123	0.0115062	0.0174449	-3.62367	10	up	1.75833
WG19079	TvsM	MNAR	-1.3956	-2.44195	-0.349252	19.2236	-2.85049	0.0124454	0.0176348	-3.43283	7	down	1.75363
WG12100	MvsR	MNAR	1.76142	0.4552	3.06764	20.7161	2.88191	0.0116863	0.0176684	-3.1304	7	up	1.7528
WG01404	MvsR	MNAR	1.1047	0.282318	1.92709	20.2494	2.87081	0.0119492	0.0180407	-3.1515	7	up	1.74375
WG31388	MvsR	MNAR	1.16019	0.293533	2.02685	20.3605	2.86098	0.0121866	0.0183478	-3.17014	7	up	1.73641
WG27445	TvsR	MAR	1.0019	0.214422	1.78938	19.8412	2.66726	0.0154321	0.0185791	-4.36647	11	up	1.73098
WG20630	MvsR	complete	-1.08116	-1.90758	-0.254741	20.5269	-2.73294	0.012989	0.0193937	-3.87108	12	down	1.71234
WG15483	TvsM	complete	1.1061	0.245342	1.96687	21.167	2.68444	0.0144353	0.0201632	-4.2438	12	up	1.69544
WG12529	TvsM	MAR	1.35293	0.287571	2.41828	19.2209	2.73215	0.0165888	0.022866	-4.22998	11	up	1.64081
WG12791	TvsM	MNAR	1.15135	0.260609	2.04209	19.1298	2.89834	0.0166105	0.0228759	-3.55673	7	up	1.64062
WG20630	TvsM	complete	-1.03479	-1.86121	-0.208369	20.5269	-2.61573	0.0167482	0.0230251	-4.38401	12	down	1.6378
WG07070	TvsM	MNAR	1.35136	0.296245	2.40647	20.4422	2.87188	0.0173644	0.0237475	-3.60086	7	up	1.62438
WG10783	TvsR	MNAR	1.53734	0.281283	2.7934	19.2072	2.65373	0.0203628	0.024356	-3.96965	7	up	1.61339
WG02485	TvsM	MNAR	1.06584	0.228026	1.90366	19.3771	2.85258	0.0179357	0.0244225	-3.63302	7	up	1.61221
WG14275	MvsR	MAR	1.02565	0.208246	1.84305	19.9582	2.64097	0.0168422	0.0244709	-3.98507	10	up	1.61135
WG15483	MvsR	complete	1.0682	0.207436	1.92896	21.167	2.59245	0.0176083	0.0255154	-4.15738	12	up	1.5932
WG01319	TvsR	MAR	1.40401	0.225012	2.58302	20.2298	2.49653	0.0221454	0.0263738	-4.70687	11	up	1.57883
WG32265	TvsM	MAR	1.29593	0.241836	2.35002	17.431	2.64501	0.0196352	0.0265523	-4.39314	11	up	1.5759
WG32030	MvsR	MNAR	1.10667	0.215285	1.99805	19.61	2.6533	0.0184279	0.0265608	-3.55998	7	up	1.57576
WG09609	MvsR	complete	1.09537	0.199128	1.99161	20.1634	2.55315	0.0191554	0.0274115	-4.23616	12	up	1.56207
WG02996	MvsR	MNAR	1.17043	0.213983	2.12688	20.2439	2.61528	0.0198659	0.0282566	-3.63035	7	up	1.54888
WG19344	TvsR	MAR	1.25314	0.179549	2.32673	20.2345	2.44704	0.024556	0.0291504	-4.80349	11	up	1.53536
WG02241	TvsR	MNAR	1.0778	0.149603	2.006	19.0194	2.4816	0.0258283	0.0305949	-4.2387	7	up	1.51435
WG17365	TvsR	MAR	1.72888	0.215742	3.24202	20.9912	2.40484	0.0274554	0.0324526	-4.83348	10	up	1.48875
WG19424	TvsR	MNAR	1.31193	0.174471	2.44939	20.8865	2.58624	0.0280705	0.0331088	-4.18608	7	up	1.48006
WG18436	TvsM	complete	1.14947	0.140007	2.15893	21.1711	2.38719	0.0277992	0.0364314	-4.84682	12	up	1.43852
WG05790	TvsR	complete	2.10751	0.185313	4.0297	22.1284	2.29041	0.0332599	0.0390627	-5.14136	12	up	1.40824
WG20666	TvsM	MNAR	1.16982	0.117751	2.22189	20.1155	2.49327	0.0328243	0.0423453	-4.22758	7	up	1.3732
WG30674	MvsR	MNAR	1.01983	0.106652	1.93301	18.6381	2.38675	0.0310579	0.0427579	-4.04537	7	up	1.36898
WG30870	MvsR	MAR	1.04608	0.088141	2.00401	19.0782	2.29841	0.0340637	0.0464349	-4.6612	10	up	1.33316
WG13912	TvsM	MNAR	1.036	0.074548	1.99746	20.4551	2.41616	0.0373665	0.0476955	-4.35343	7	up	1.32152
WG08294	TvsR	MNAR	1.54894	0.0662331	3.03164	19.6814	2.23261	0.0417459	0.0486154	-4.68682	7	up	1.31323
WG00612	TvsR	complete	-3.90799	-4.26761	-3.54837	21.7791	-22.7014	1.61393e-15	1.3706e-13	25.7556	12	down	12.8631
WG06739	TvsR	MAR	3.10604	2.74222	3.46986	20.4024	17.898	3.70322e-13	8.28579e-12	20.4073	11	up	11.0817
WG05227	TvsR	complete	2.04128	1.78016	2.3024	20.5066	16.3307	7.40177e-13	1.21102e-11	19.6495	12	up	10.9168
WG24943	TvsR	complete	2.45645	2.14209	2.77081	20.1949	16.3238	7.45918e-13	1.21102e-11	19.6417	12	up	10.9168
WG13447	TvsR	complete	2.75682	2.39183	3.12181	20.1508	15.7786	1.38601e-12	1.9127e-11	19.0156	12	up	10.7184
WG00612	TvsM	complete	-2.94314	-3.30276	-2.58352	21.7791	-17.0965	3.19489e-13	2.95058e-11	20.5138	12	down	10.5301
WG00051	TvsR	complete	2.27265	1.91836	2.62693	21.5207	13.4006	2.61011e-11	1.88337e-10	16.0343	12	up	9.72506
WG02638	TvsR	complete	1.93884	1.63641	2.24128	21.0539	13.3921	2.63934e-11	1.8921e-10	16.023	12	up	9.72306
WG08156	TvsR	complete	2.94396	2.47999	3.40792	21.6293	13.2552	3.1662e-11	2.18468e-10	15.8374	12	up	9.66061
WG04125	TvsR	complete	2.82479	2.3534	3.29617	20.3124	12.5185	8.65566e-11	4.87543e-10	14.8111	12	up	9.31199
WG14763	TvsR	complete	1.73332	1.4378	2.02884	20.2745	12.2528	1.25834e-10	6.58391e-10	14.4288	12	up	9.18152
WG05106	TvsR	complete	1.69645	1.36656	2.02634	20.5439	10.7428	1.19847e-09	4.54676e-09	12.1219	12	up	8.3423
WG16676	TvsR	complete	2.12941	1.71523	2.54359	20.2955	10.7402	1.20342e-09	4.5499e-09	12.1177	12	up	8.342
WG06189	TvsR	complete	1.59516	1.28254	1.90777	21.8792	10.6595	1.36624e-09	5.04459e-09	11.9877	12	up	8.29717
WG26508	TvsR	complete	1.6502	1.32307	1.97734	19.5013	10.5378	1.6567e-09	5.97711e-09	11.7901	12	up	8.22351
WG26490	TvsR	complete	1.85843	1.48703	2.22982	19.8578	10.4533	1.89582e-09	6.75382e-09	11.6519	12	up	8.17045
WG02977	TvsR	complete	1.77579	1.42091	2.13068	19.7491	10.4531	1.89645e-09	6.75382e-09	11.6515	12	up	8.17045
WG07224	TvsR	complete	2.399	1.90879	2.88922	19.9764	10.2232	2.74749e-09	9.33303e-09	11.2714	12	up	8.02998
WG06739	MvsR	MAR	2.2572	1.89338	2.62101	20.4024	13.0067	9.07396e-11	1.07765e-08	14.9523	11	up	7.96752
WG08983	TvsR	complete	1.7476	1.38129	2.11391	20.691	9.96621	4.18687e-09	1.35155e-08	10.8394	12	up	7.86917
WG09776	TvsR	complete	1.58046	1.24427	1.91666	21.3838	9.82052	5.33433e-09	1.69227e-08	10.5909	12	up	7.77153
WG13447	MvsR	complete	1.91851	1.55352	2.2835	20.1508	10.9806	8.27818e-10	2.88668e-08	12.7074	12	up	7.5396
WG24943	MvsR	complete	1.6374	1.32304	1.95176	20.1949	10.881	9.65922e-10	3.16413e-08	12.5528	12	up	7.49975
WG12696	TvsR	complete	1.36695	1.05662	1.67729	19.2365	9.20167	1.53445e-08	4.34368e-08	9.50689	12	up	7.36214
WG06935	TvsR	complete	-1.32871	-1.63719	-1.02024	20.5187	-8.99804	2.19454e-08	6.01184e-08	9.13975	12	down	7.22099
WG00621	TvsR	MAR	3.87225	3.01167	4.73283	19.1808	9.47054	2.56618e-08	6.84315e-08	9.17355	10	up	7.16474
WG00051	MvsR	complete	1.65303	1.29875	2.00732	21.5207	9.74703	6.03311e-09	1.01903e-07	10.712	12	up	6.99181
WG02638	MvsR	complete	1.39873	1.09629	1.70117	21.0539	9.66144	6.96875e-09	1.12436e-07	10.5667	12	up	6.94909
WG09744	TvsR	MAR	1.63394	1.25572	2.01216	18.8645	9.09274	4.6744e-08	1.16754e-07	8.55785	10	up	6.93273
WG00220	TvsR	complete	1.32167	0.984211	1.65913	20.1479	8.18168	9.70792e-08	2.2999e-07	7.61417	12	up	6.63829
WG12004	TvsR	complete	1.65849	1.23064	2.08635	20.1011	8.0976	1.13702e-07	2.65947e-07	7.45206	12	up	6.57521
WG00931	TvsR	MAR	2.14641	1.60156	2.69126	19.8314	8.25872	1.24145e-07	2.87808e-07	7.45054	11	up	6.5409
WG25429	TvsR	complete	1.35751	0.997684	1.71734	21.7976	7.88115	1.71527e-07	3.81786e-07	7.03043	12	up	6.41818
WG05227	MvsR	complete	1.02715	0.766027	1.28826	20.5066	8.21742	9.07976e-08	7.01087e-07	7.97465	12	up	6.15423
WG14763	MvsR	complete	1.15747	0.861951	1.45299	20.2745	8.18213	9.6998e-08	7.43651e-07	7.90784	12	up	6.12863
WG08156	MvsR	complete	1.80616	1.34219	2.27012	21.6293	8.13222	1.06526e-07	7.99686e-07	7.81306	12	up	6.09708
WG16676	MvsR	complete	1.57498	1.1608	1.98916	20.2955	7.94378	1.52193e-07	1.06831e-06	7.45214	12	up	5.9713
WG06189	TvsM	complete	1.25206	0.939448	1.56468	21.8792	8.36679	6.87752e-08	1.48547e-06	8.06314	12	up	5.82814
WG05227	TvsM	complete	1.01413	0.753013	1.27525	20.5066	8.1133	1.10387e-07	2.16634e-06	7.57933	12	up	5.66427
WG08321	TvsR	complete	1.10745	0.772068	1.44283	20.5682	6.89806	1.20144e-06	2.30676e-06	5.03656	12	up	5.637
WG07224	MvsR	complete	1.71491	1.2247	2.20513	19.9764	7.30796	5.25233e-07	2.82476e-06	6.19852	12	up	5.54902
WG02546	TvsR	complete	1.11108	0.754704	1.46745	21.8312	6.51301	2.66801e-06	4.75845e-06	4.22096	12	up	5.32253
WG04754	TvsM	complete	1.16986	0.881831	1.45789	19.1313	8.68019	3.9067e-07	5.42789e-06	6.57434	12	up	5.26537
WG06935	TvsM	complete	-1.09724	-1.40572	-0.788762	20.5187	-7.43051	4.11933e-07	5.5753e-06	6.23324	12	down	5.25373
WG04125	MvsR	complete	1.54792	1.07654	2.01931	20.3124	6.85985	1.29929e-06	5.85222e-06	5.28185	12	up	5.23268
WG00621	MvsR	MAR	2.87374	2.01317	3.73432	19.1808	7.02844	1.69448e-06	7.12735e-06	5.17107	10	up	5.14707
WG26490	TvsM	complete	1.23909	0.8677	1.61049	19.8578	6.96965	1.03808e-06	9.64371e-06	5.28929	12	up	5.01576
WG10849	TvsM	complete	1.15279	0.84066	1.46492	19.5052	7.89308	1.24031e-06	1.10016e-05	5.37754	12	up	4.95854
WG08983	MvsR	complete	1.12119	0.754879	1.48751	20.691	6.39394	3.4281e-06	1.30027e-05	4.30051	12	up	4.88597
WG03437	TvsM	complete	1.01336	0.716939	1.30979	20.2195	7.22746	1.65247e-06	1.35327e-05	4.95645	12	up	4.86861
WG00220	TvsM	complete	1.08482	0.747361	1.42228	20.1479	6.71548	1.74954e-06	1.40142e-05	4.75667	12	up	4.85343
WG12004	MvsR	complete	1.27817	0.850313	1.70603	20.1011	6.24067	4.74646e-06	1.71031e-05	3.97161	12	up	4.76693
WG09776	TvsM	complete	1.02096	0.684769	1.35716	21.3838	6.34396	3.81054e-06	2.38862e-05	3.96323	12	up	4.62185
WG09744	MvsR	MAR	1.11354	0.735326	1.49176	18.8645	6.19678	8.44826e-06	2.82742e-05	3.54726	10	up	4.54861
WG01217	TvsM	MAR	1.13725	0.790788	1.4837	20.014	7.11706	9.51538e-06	4.72758e-05	3.49882	10	up	4.32536
WG10432	MvsR	MAR	-1.35844	-1.84946	-0.86742	19.5989	-5.82293	1.79271e-05	5.55279e-05	2.78745	10	down	4.25549
WG04125	TvsM	complete	1.27687	0.80548	1.74825	20.3124	5.65861	1.67733e-05	7.13659e-05	2.45641	12	up	4.14651
WG05977	TvsM	complete	1.40274	0.922777	1.88271	17.5696	6.246	1.79595e-05	7.53077e-05	2.61033	12	up	4.12316
WG07704	TvsR	MAR	3.3458	2.00108	4.69053	23.3949	5.23682	6.04161e-05	9.2638e-05	1.15867	11	up	4.03321
WG15411	TvsM	complete	1.09765	0.685255	1.51004	20.168	5.62713	3.33079e-05	0.000121612	1.87322	12	up	3.91502
WG01286	TvsM	complete	1.22646	0.745968	1.70695	20.5821	5.39638	5.2824e-05	0.000174712	1.40193	12	up	3.75768
WG08156	TvsM	complete	1.1378	0.673832	1.60177	21.6293	5.12295	5.54522e-05	0.000180998	1.24577	12	up	3.74233
WG00931	TvsM	complete	1.26424	0.744745	1.78374	19.8314	5.10184	6.80189e-05	0.000211465	1.07068	12	up	3.67476
WG17958	MvsR	MNAR	1.81978	1.09644	2.54312	19.2905	5.41256	0.00010246	0.000248897	1.51585	7	up	3.60398
WG12074	TvsM	MAR	1.60357	0.971184	2.23595	19.8157	5.49799	0.000116199	0.000319498	0.898261	10	up	3.49553
WG12161	TvsM	MAR	1.17435	0.678071	1.67062	19.4402	5.09094	0.000181773	0.00046104	0.320347	11	up	3.33626
WG14504	TvsR	MNAR	1.99	1.04586	2.93414	17.7131	4.53462	0.000505778	0.000701481	-0.334112	7	up	3.15398
WG01414	TvsM	MAR	1.03855	0.561547	1.51556	19.3212	4.65306	0.000337432	0.000752511	-0.304227	10	up	3.12349
WG08071	MvsR	complete	-1.18148	-1.74652	-0.616432	18.9022	-4.46865	0.000483629	0.000990913	-0.516956	12	down	3.00396
WG02975	TvsM	MAR	1.31152	0.701329	1.92171	19.2112	4.66022	0.000488906	0.00103031	-0.586245	10	up	2.98703
WG05594	TvsM	MNAR	1.40478	0.76326	2.04629	18.767	4.91013	0.000701582	0.00141035	-0.336452	7	up	2.85067
WG10849	TvsR	MNAR	1.0697	0.485755	1.65365	19.5052	3.91493	0.0014528	0.0019324	-1.43206	7	up	2.7139
WG13684	TvsR	MNAR	1.60305	0.658723	2.54737	20.6658	3.62794	0.00259027	0.00336035	-2.00668	7	up	2.47362
WG09196	TvsR	complete	-1.11527	-1.79605	-0.434498	19.9967	-3.42231	0.0027665	0.00358476	-2.76895	12	down	2.44554
WG07226	TvsR	complete	1.03929	0.393076	1.6855	19.5426	3.35971	0.00319207	0.00411687	-2.90887	12	up	2.38543
WG17342	TvsM	MAR	1.01428	0.420754	1.6078	20.8337	3.67658	0.00261679	0.00443668	-2.4001	11	up	2.35294
WG12161	TvsR	MNAR	1.40208	0.516842	2.28732	19.4402	3.40751	0.00442812	0.00563208	-2.50622	7	up	2.24933
WG08982	TvsM	MNAR	1.04013	0.433646	1.64661	20.2053	3.84559	0.003519	0.00574306	-1.99	7	up	2.24086
WG07704	MvsR	MAR	2.14784	0.74332	3.55236	23.3949	3.21866	0.00488198	0.00791217	-2.81731	10	up	2.1017
WG06487	TvsM	complete	1.01994	0.261037	1.77885	18.8135	2.84134	0.0114977	0.0164703	-3.98324	12	up	1.7833
WG13684	MvsR	MNAR	1.26173	0.317409	2.20605	20.6658	2.85549	0.0123214	0.0184735	-3.18056	7	up	1.73345
WG09826	MvsR	MAR	-1.06763	-1.99373	-0.14153	18.4375	-2.49954	0.0271749	0.0380519	-4.34926	10	down	1.41962
